# Supplementary material for: Chemo- and regioselective synthesis of C3-sulfonate esters and C4-chlorides of quinolines under metal-free conditions
Source: Royal Society of Chemistry journal article supplement (doi:10.1039/d2qo01621d), 2023-01-01

## Supporting Information

### **Chemo- and Regioselective Synthesis of C3-Sulfonate Esters and C4-Chloro of Quinolines Under Metal Free Conditions**

Dong Chen,\* Yan Liu, Zhiqiang Lu, Haojie Wang, Mingjia Li, Dan Yue\* and Zhenling Wang\*

College of Material Engineering, Henan International Joint Laboratory of Rare Earth Composite Materials, Henan University of Engineering, Zhengzhou, 451191, P. R. China.

Email: chendong@haue.edu.cn

### **Table of Contents**

|                                     |     |
|-------------------------------------|-----|
| 1. General experimental details     | S2  |
| 2. General procedure for reactions  | S2  |
| 3. X-ray crystal structure of 3na   | S2  |
| 4. Characterization of new products | S5  |
| 5. Spectroscopic data for products  | S16 |

## 1. General experimental details

Unless otherwise noted all commercial materials were used without further purification.  $^1\text{H-NMR}$  spectra were recorded on a BRUKER AVANCE III HD (400 MHz) spectrometer. Chemical shifts are reported in ppm from tetramethylsilane with the solvent resonance as internal standard ( $\text{CDCl}_3$ ;  $\delta$  7.26). Data are reported as follows: chemical shift, multiplicity (s = singlet, d = doublet, t = triplet, q = quadruplet, br = broad, m = multiplet), coupling constants (Hz) and integration.  $^{13}\text{C-NMR}$  spectra were recorded on a BRUKER AVANCE III HD (100 MHz) spectrometer with complete proton decoupling. Chemical shifts are reported in ppm from tetramethylsilane with the solvent resonance as the internal standard ( $\text{CDCl}_3$ ;  $\delta$  77.16).  $^{19}\text{F-NMR}$  spectra were recorded on a BRUKER AVANCE III HD (377 MHz) spectrometer. Mass spectra were measured with an Agilent Technologies 6120 Quadrupole LC/MS. High resolution mass spectrometry (HRMS) were measured with a GCT Premier<sup>TM</sup> and BRUKER micrOTF-Q III.

## 2. General procedure for reactions

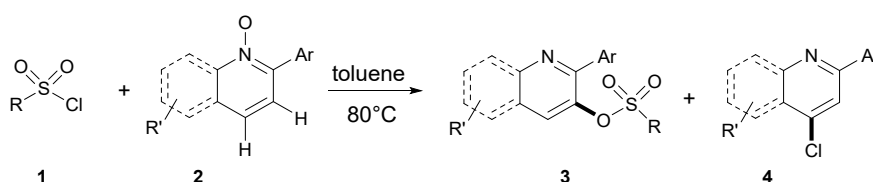

0.2 mmol Sulfonyl chlorides (**1**) in 2 mL toluene was added into a Schlenk tube charged with 0.42 mmol 2-arylquinoline N-oxides (**2**). The mixture was stirred at 80 °C for 12 hours, then cooled down to room temperature. The mixture was concentrated, and purified by flash column chromatography on silica gel (EA/ PE = 0/50-1/10) to give the product **3** and **4**.

## 3. X-ray crystal structure of 3na

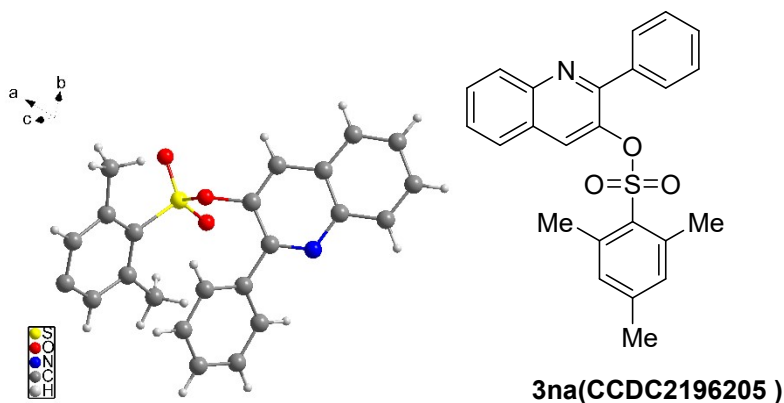

**Table 1 Crystallographic Data collection and Refinement result for CD**

|                                                                                                                                                                                                                        |                                                   |
|------------------------------------------------------------------------------------------------------------------------------------------------------------------------------------------------------------------------|---------------------------------------------------|
| Identification code                                                                                                                                                                                                    | CD                                                |
| Chemical formula                                                                                                                                                                                                       | C <sub>24</sub> H <sub>21</sub> NO <sub>3</sub> S |
| Formula weight                                                                                                                                                                                                         | 403.08                                            |
| Temperature/ K                                                                                                                                                                                                         | 293(2)                                            |
| Wavelength/ Å                                                                                                                                                                                                          | 1.54178                                           |
| Crystal system                                                                                                                                                                                                         | Triclinic                                         |
| Space group                                                                                                                                                                                                            | <i>P</i> -1                                       |
| <i>a</i> / Å                                                                                                                                                                                                           | 9.9176(12)                                        |
| <i>b</i> / Å                                                                                                                                                                                                           | 10.2533(12)                                       |
| <i>c</i> / Å                                                                                                                                                                                                           | 11.2559(13)                                       |
| <i>α</i> / °                                                                                                                                                                                                           | 67.180(4)                                         |
| <i>β</i> / °                                                                                                                                                                                                           | 70.253(4)                                         |
| <i>γ</i> / °                                                                                                                                                                                                           | 79.073(4)                                         |
| <i>Z</i>                                                                                                                                                                                                               | 2                                                 |
| Density (calculated g/cm <sup>3</sup> )                                                                                                                                                                                | 1.353                                             |
| Absorption coefficient /mm <sup>-1</sup>                                                                                                                                                                               | 1.661                                             |
| Reflections collected                                                                                                                                                                                                  | 11590                                             |
| Independent reflections                                                                                                                                                                                                | 3439 [R(int) = 0.0680]                            |
| F(000)                                                                                                                                                                                                                 | 424                                               |
| Goodness-of-fit on F <sup>2</sup>                                                                                                                                                                                      | 1.031                                             |
| R <sub>1</sub> , wR <sub>2</sub> (I > 2σ(I)) <sup>a</sup>                                                                                                                                                              | 0.1156, 0.2850                                    |
| R <sub>1</sub> , wR <sub>2</sub> (all data) <sup>a</sup>                                                                                                                                                               | 0.1168, 0.2865                                    |
| <sup>a</sup> R <sub>1</sub> = Σ( F <sub>o</sub> -  F <sub>c</sub>   ) / Σ F <sub>o</sub>  ; wR <sub>2</sub> = [Σw( F <sub>o</sub> -  F <sub>c</sub>    <sup>2</sup> ) / ΣwF <sub>o</sub> <sup>2</sup> ] <sup>1/2</sup> |                                                   |

**Table 2. Atomic coordinates ( $\times 10^4$ ) and equivalent isotropic displacement parameters ( $\text{\AA}^2 \times 10^3$ ) for CD.  $U(\text{eq})$  is defined as one third of the trace of the orthogonalized  $U_{ij}$  tensor.**

|        | x        | y        | z       | $U(\text{eq})$ |
|--------|----------|----------|---------|----------------|
| S(1)   | 5805(1)  | 2955(1)  | 2689(1) | 18(1)          |
| O(003) | 4878(4)  | 1899(3)  | 3014(4) | 33(1)          |
| O(2)   | 5739(3)  | 3073(3)  | 4098(3) | 22(1)          |
| O(004) | 7266(3)  | 2764(3)  | 1993(3) | 27(1)          |
| N(3)   | 9060(3)  | 3025(3)  | 4836(3) | 18(1)          |
| C(006) | 6922(4)  | 2549(4)  | 4618(4) | 16(1)          |
| C(007) | 8039(4)  | 4941(4)  | 3303(4) | 17(1)          |
| C(008) | 9116(4)  | 1670(4)  | 5719(4) | 17(1)          |
| C(009) | 6960(4)  | 1180(4)  | 5470(4) | 20(1)          |
| C(00A) | 5839(4)  | 5649(4)  | 791(4)  | 19(1)          |
| C(00B) | 7992(4)  | 3465(4)  | 4287(4) | 16(1)          |
| C(00C) | 5029(4)  | 4658(4)  | 1970(4) | 15(1)          |
| C(00D) | 8102(4)  | 697(4)   | 6060(4) | 18(1)          |
| C(00E) | 3030(5)  | 6371(4)  | 2127(4) | 24(1)          |
| C(00F) | 2647(4)  | 3971(5)  | 3846(4) | 24(1)          |
| C(00G) | 5169(5)  | 6990(4)  | 319(4)  | 23(1)          |
| C(00H) | 9361(5)  | 5401(4)  | 2400(4) | 24(1)          |
| C(00I) | 10252(4) | 1239(4)  | 6315(4) | 23(1)          |
| C(00J) | 3607(4)  | 4998(4)  | 2642(4) | 19(1)          |
| C(00K) | 6961(5)  | 7281(4)  | 2392(5) | 29(1)          |
| C(00L) | 9370(5)  | -1091(4) | 7497(4) | 26(1)          |
| C(00M) | 6827(5)  | 5898(4)  | 3298(4) | 22(1)          |
| C(00N) | 10360(5) | -116(5)  | 7189(4) | 26(1)          |
| C(00O) | 8250(5)  | -702(4)  | 6963(4) | 24(1)          |
| C(00P) | 9472(5)  | 6771(5)  | 1488(5) | 31(1)          |
| C(00Q) | 7345(5)  | 5396(5)  | -3(4)   | 26(1)          |
| C(00R) | 3794(5)  | 7368(4)  | 962(4)  | 25(1)          |
| C(00S) | 8255(6)  | 7712(5)  | 1491(5) | 34(1)          |
| C(00T) | 3113(6)  | 8834(5)  | 409(6)  | 41(1)          |

## 4. Characterization of new products

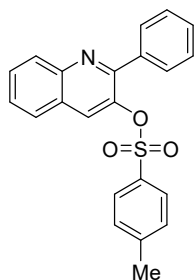

**2-phenylquinolin-3-yl 4-methylbenzenesulfonate 3aa.** Yield: 61.7 mg, 82% (based on sulfonyl chloride **1**). White solid. m.p. 107-108 °C. **<sup>1</sup>H NMR (400 MHz, CDCl<sub>3</sub>)** δ 8.33 (s, 1H), 8.11 (d, *J* = 8.4 Hz, 1H), 7.89 (d, *J* = 8.0 Hz, 1H), 7.74 (ddd, *J* = 1.2, 6.8, 8.4 Hz, 1H), 7.63-7.56 (m, 1H), 7.54-7.48 (m, 2H), 7.39-7.27 (m, 3H), 7.16 (d, *J* = 8.4 Hz, 2H), 6.91 (d, *J* = 8.0 Hz, 2H), 2.33 (s, 3H); **<sup>13</sup>C NMR (101 MHz, CDCl<sub>3</sub>)** δ 153.6, 146.6, 145.3, 141.4, 136.5, 131.4, 130.2, 130.1, 129.6, 129.5, 129.5, 128.9, 128.1, 128.0, 127.8, 127.7, 127.5, 21.7; **HRMS [ESI]** calcd for C<sub>22</sub>H<sub>18</sub>NO<sub>3</sub>S [M+H]<sup>+</sup> 376.1002, found 376.1008.

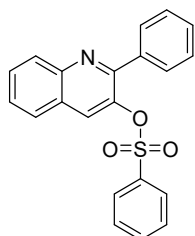

**2-phenylquinolin-3-yl benzenesulfonate 3ba.** Yield: 61.4 mg, 85% (based on sulfonyl chloride **1**). White solid. m.p. 104-105 °C. **<sup>1</sup>H NMR (400 MHz, CDCl<sub>3</sub>)** δ 8.39-8.30 (m, 1H), 8.19-8.08 (m, 1H), 7.96-7.86 (m, 1H), 7.81-7.71 (m, 1H), 7.67-7.58 (m, 1H), 7.58-7.50 (m, 2H), 7.50-7.41 (m, 1H), 7.41-7.27 (m, 5H), 7.22-7.11 (m, 2H); **<sup>13</sup>C NMR (101 MHz, CDCl<sub>3</sub>)** δ 153.5, 146.6, 141.3, 136.4, 134.6, 134.1, 130.2, 130.0, 129.5, 129.5, 128.9, 128.9, 128.2, 128.1, 127.8, 127.7, 127.5; **HRMS [ESI]** calcd for C<sub>21</sub>H<sub>16</sub>NO<sub>3</sub>S [M+H]<sup>+</sup> 362.0845, found 362.0841.

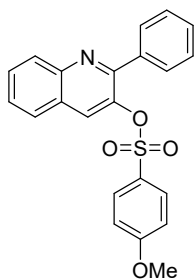

**2-phenylquinolin-3-yl 4-methoxybenzenesulfonate 3ca.** Yield: 61.8 mg, 79% (based on sulfonyl chloride **1**). White solid. m.p. 102-103 °C. **<sup>1</sup>H NMR (400 MHz, CDCl<sub>3</sub>)** δ 8.33 (s, 1H), 8.11 (d, *J* = 8.4 Hz, 1H), 7.89 (d, *J* = 8.0 Hz, 1H), 7.74 (ddd, *J* = 1.2, 6.8, 8.4 Hz, 1H), 7.63-7.58 (m, 1H), 7.58-7.53 (m, 2H), 7.38-7.29 (m, 3H), 7.22-7.16 (m, 2H), 6.58-6.53 (m, 2H), 3.79 (s, 3H); **<sup>13</sup>C NMR (101 MHz, CDCl<sub>3</sub>)** δ 164.0, 153.5, 146.6, 141.4, 136.6, 130.3, 130.2, 130.2, 129.6, 129.5, 128.9, 128.1, 127.8, 127.7, 127.4, 125.6, 114.1, 55.7; **HRMS [ESI]** calcd for C<sub>22</sub>H<sub>18</sub>NO<sub>4</sub>S [M+H]<sup>+</sup> 392.0951, found 392.0956.

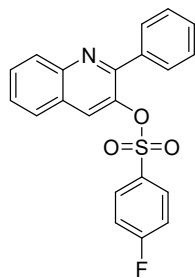

**2-phenylquinolin-3-yl 4-fluorobenzenesulfonate 3da.** Yield: 66.0 mg, 87% (based on sulfonyl chloride **1**). White solid. m.p. 145-146 °C. **<sup>1</sup>H NMR (400 MHz, CDCl<sub>3</sub>)** δ 8.35 (s, 1H), 8.12 (d, *J* = 8.4 Hz, 1H), 7.91 (d, *J* = 8.0 Hz, 1H), 7.76 (dd, *J* = 7.2, 7.2 Hz, 1H), 7.61 (dd, *J* = 7.2, 7.6 Hz, 1H), 7.56-7.50 (m, 2H), 7.40-7.31 (m, 3H), 7.30-7.24 (m, 2H), 6.78 (dd, *J* = 8.4, 8.4 Hz, 2H); **<sup>13</sup>C NMR (101 MHz, CDCl<sub>3</sub>)** δ 166.0 (d, *J*<sub>C-F</sub> = 256.0 Hz), 153.3, 146.8, 141.2, 136.4, 131.0 (d, *J*<sub>C-F</sub> = 9.9 Hz), 130.4, 130.4, 130.4, 129.6, 129.6, 129.1, 128.3, 127.8, 127.7, 127.6, 116.3 (d, *J*<sub>C-F</sub> = 22.8 Hz); **<sup>19</sup>F NMR (377 MHz, CDCl<sub>3</sub>)** δ -102.1 (s); **HRMS [ESI]** calcd for C<sub>21</sub>H<sub>15</sub>FNO<sub>3</sub>S [M+H]<sup>+</sup> 380.0751, found 380.0751.

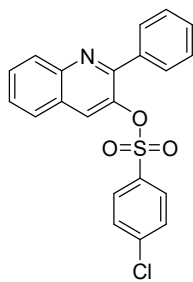

**2-phenylquinolin-3-yl 4-chlorobenzenesulfonate 3ea.** Yield: 52.2 mg, 66% (based on sulfonyl chloride **1**). White solid. m.p. 146-147 °C. **<sup>1</sup>H NMR (400 MHz, CDCl<sub>3</sub>)** δ 8.34 (s, 1H), 8.12 (d, *J* = 8.8 Hz, 1H), 7.91 (d, *J* = 8.0 Hz, 1H), 7.75 (ddd, *J* = 1.2, 7.2, 8.4 Hz, 1H), 7.61 (dd, *J* = 7.2, 7.2 Hz, 1H), 7.53-7.46 (m, 2H), 7.40-7.30 (m, 3H), 7.16 (d, *J* = 8.4 Hz, 2H), 7.05 (d, *J* = 8.4 Hz, 2H); **<sup>13</sup>C NMR (101 MHz, CDCl<sub>3</sub>)** δ 153.2, 146.8, 141.1, 141.1, 136.3, 132.7, 130.5, 130.4, 129.6, 129.5, 129.4, 129.2, 129.1, 128.2, 127.8, 127.7, 127.6; **HRMS [ESI]** calcd for C<sub>21</sub>H<sub>15</sub>ClNO<sub>3</sub>S [M+H]<sup>+</sup> 396.0456, found 396.0457.

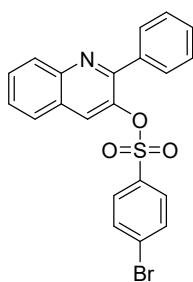

**2-phenylquinolin-3-yl 4-bromobenzenesulfonate 3fa.** Yield: 59.8 mg, 68% (based on sulfonyl chloride **1**). White solid. m.p. 167-168 °C. **<sup>1</sup>H NMR (400 MHz, CDCl<sub>3</sub>)** δ 8.34 (s, 1H), 8.12 (d, *J* = 8.8 Hz, 1H), 7.91 (d, *J* = 8.0 Hz, 1H), 7.76 (dd, *J* = 7.2, 8.0 Hz, 1H), 7.61 (dd, *J* = 7.2, 7.6 Hz, 1H), 7.52-7.45 (m, 2H), 7.41-7.31 (m, 3H), 7.22 (d, *J* = 8.4 Hz, 1H), 7.08 (d, *J* = 8.4 Hz, 1H); **<sup>13</sup>C NMR (101 MHz, CDCl<sub>3</sub>)** δ 153.3, 146.8, 141.2, 136.3, 133.3, 132.2, 130.5, 130.4, 129.8, 129.6, 129.5, 129.4, 129.1, 128.2, 127.8, 127.7, 127.7; **HRMS [ESI]** calcd for C<sub>21</sub>H<sub>15</sub>BrNO<sub>3</sub>S [M+H]<sup>+</sup> 439.9951, found 439.9947.

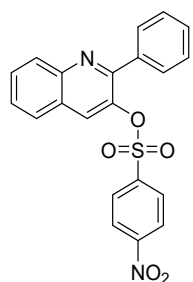

**2-phenylquinolin-3-yl 4-nitrobenzenesulfonate 3ga.** Yield: 64.2 mg, 79% (based on sulfonyl chloride **1**). Yellow solid. m.p. 168-169 °C. **<sup>1</sup>H NMR (400 MHz, CDCl<sub>3</sub>)** δ 8.34 (s, 1H), 8.12 (d, *J* = 8.4 Hz, 1H), 7.91 (d, *J* = 8.4 Hz, 1H), 7.76 (ddd, *J* = 1.2, 7.2, 8.4 Hz, 1H), 7.61 (ddd, *J* = 0.8, 6.8, 7.6 Hz, 1H), 7.51-7.45 (m, 2H), 7.41-7.31 (m, 3H), 7.22 (d, *J* = 8.4 Hz, 1H), 7.08 (d, *J* = 8.4 Hz, 1H); **<sup>13</sup>C NMR (101 MHz, CDCl<sub>3</sub>)** δ 153.2, 146.8, 141.1, 136.3, 133.3, 132.1, 130.5, 130.4, 129.8, 129.6, 129.5, 129.4, 129.1, 128.2, 127.8, 127.7, 127.6; **HRMS [ESI]** calcd for C<sub>21</sub>H<sub>15</sub>FNO<sub>3</sub>S [M+H]<sup>+</sup> 407.0696, found 407.0688.

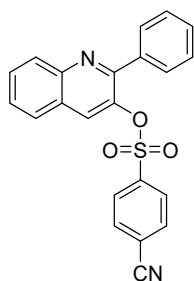

**2-phenylquinolin-3-yl 4-cyanobenzenesulfonate 3ha.** Yield: 67.3 mg, 87% (based on sulfonyl chloride **1**). White solid. m.p. 128-129 °C. **<sup>1</sup>H NMR (400 MHz, CDCl<sub>3</sub>)** δ 8.35 (s, 1H), 8.12 (d, *J* = 8.4 Hz, 1H), 7.92 (d, *J* = 8.0 Hz, 1H), 7.78 (ddd, *J* = 1.2, 6.8, 8.4 Hz, 1H), 7.63 (ddd, *J* = 0.8, 7.2, 8.0 Hz, 1H), 7.50-7.44 (m, 2H), 7.42-7.29 (m, 7H); **<sup>13</sup>C NMR (101 MHz, CDCl<sub>3</sub>)** δ 152.7, 146.9, 140.9, 138.5, 136.2, 132.4, 130.7, 130.6, 129.6, 129.5, 129.3, 128.6, 128.4, 127.8, 127.8, 127.6, 117.7, 116.9; **HRMS [ESI]** calcd for C<sub>22</sub>H<sub>15</sub>N<sub>2</sub>O<sub>3</sub>S [M+H]<sup>+</sup> 387.0798, found 387.0804.

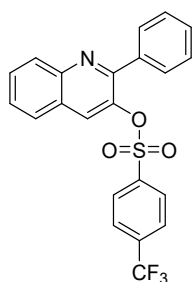

**2-phenylquinolin-3-yl 4-(trifluoromethyl)benzenesulfonate 3ia.** Yield: 49.8 mg, 58% (based on sulfonyl chloride **1**). White solid. m.p. 92-93 °C. **<sup>1</sup>H NMR (400 MHz, CDCl<sub>3</sub>)** δ 8.37 (s, 1H), 8.12 (d, *J* = 8.4 Hz, 1H), 7.93 (d, *J* = 8.0 Hz, 1H), 7.77 (dd, *J* = 7.6, 8.0 Hz, 1H), 7.63 (dd, *J* = 7.2, 7.6 Hz, 1H), 7.44 (d, *J* = 7.2 Hz, 1H), 7.40-7.32 (m, 5H), 7.28 (dd, *J* = 6.8, 7.6 Hz, 2H); **<sup>13</sup>C NMR (101 MHz, CDCl<sub>3</sub>)** δ 153.0, 146.9, 141.1, 137.9, 136.2, 135.5 (q, *J*<sub>C-F</sub> = 33.0 Hz), 130.6, 130.6, 129.6, 129.4, 129.1, 128.6, 128.4, 127.8, 127.7, 127.7, 125.9 (q, *J*<sub>C-F</sub> = 3.6 Hz), 123.0 (q, *J*<sub>C-F</sub> = 271.6 Hz); **<sup>19</sup>F NMR (377 MHz, CDCl<sub>3</sub>)** δ -63.5 (s); **HRMS [ESI]** calcd for C<sub>22</sub>H<sub>15</sub>F<sub>3</sub>NO<sub>3</sub>S [M+H]<sup>+</sup> 430.0719, found 430.0718.

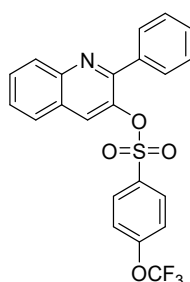

**2-phenylquinolin-3-yl 4-(trifluoromethoxy)benzenesulfonate 3ja.** Yield: 51.7 mg, 58% (based on sulfonyl chloride **1**). White solid. m.p. 62-63 °C. **<sup>1</sup>H NMR (400 MHz, CDCl<sub>3</sub>)** δ 8.36 (s, 1H), 8.12 (d, *J* = 8.4 Hz, 1H), 7.92 (d, *J* = 8.0 Hz, 1H), 7.76 (dd, *J* = 7.2, 8.4 Hz, 1H), 7.62 (dd, *J* = 7.2, 7.6 Hz, 1H), 7.51 (d, *J* = 6.8 Hz, 1H), 7.40-7.27 (m, 5H), 6.91 (d, *J* = 8.4 Hz, 2H); **<sup>13</sup>C NMR (101 MHz, CDCl<sub>3</sub>)** δ 153.2, 153.1, 146.8, 141.1, 136.3, 132.6, 130.5 (q, *J*<sub>C-F</sub> = 2.2 Hz), 130.4, 129.6, 129.5, 129.1, 128.3, 127.8, 127.7, 120.4, 120.2 (q, *J*<sub>C-F</sub> = 258.6 Hz); **<sup>19</sup>F NMR (377 MHz, CDCl<sub>3</sub>)** δ -57.5 (s); **HRMS [ESI]** calcd for C<sub>22</sub>H<sub>15</sub>F<sub>3</sub>NO<sub>4</sub>S [M+H]<sup>+</sup> 446.0668, found 446.0672.

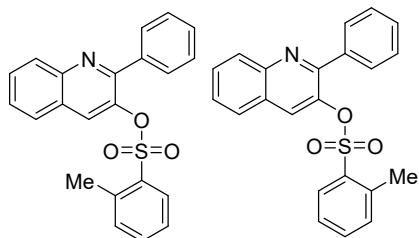

**2-phenylquinolin-3-yl 2-methylbenzenesulfonate 3la** (mixture of 3la and 3l'a', ratio 4:1). Yield: 52.5 mg, 70% (based on sulfonyl chloride **1**). White solid. m.p. 167-168 °C. **<sup>1</sup>H NMR (400 MHz, CDCl<sub>3</sub>)** δ 8.32 (s, 0.2H, one isomer), 8.22 (s, 0.8H, one isomer), 8.12 (d, *J* = 8.4 Hz, 1H, two isomers), 7.89 (d, *J* = 8.4 Hz, 0.2H, one isomer), 7.84 (d, *J* = 8.0 Hz, 0.8H, one isomer), 7.77-7.69 (m, 1H, two isomers), 7.63-7.51 (m, 3.2H, two isomers), 7.47 (d, *J* = 7.6 Hz, 0.8H, one isomer), 7.42-7.28 (m, 4H, two isomers), 7.18 (d, *J* = 8.4 Hz, 0.3H, one isomer), 7.11-7.02 (m, 1.6H, one isomer), 6.92 (d, *J* = 8.0 Hz, 0.4H, one isomer), 2.33 (s, 0.6H, one isomer), 2.30 (s, 2.4H, one isomer); **<sup>13</sup>C NMR (101 MHz, CDCl<sub>3</sub>)** δ 153.8 & 153.5 (two isomers), 146.4 & 145.3 (two isomers), 141.5 & 141.4 (two isomers), 139.4 & 139.2 (two isomers), 136.6 & 136.5 (two isomers), 134.3 & 133.7 (two isomers), 132.8 & 131.4 (two isomers), 130.2 (overlap, two isomers), 130.1 & 130.1 (two isomers), 129.5 & 129.5 (two isomers), 129.3 (overlap, two isomers), 129.0 & 128.9 (two isomers), 128.3 (overlap, two isomers), 128.1 & 128.1 (overlap, two isomers), 128.0 (overlap, two isomers), 127.7 & 127.7 (two isomers), 127.6 (overlap, two isomers), 127.4 (overlap, two isomers), 126.1 (overlap, two isomers), 21.7 & 20.7 (two isomers); **HRMS [ESI]** calcd for C<sub>22</sub>H<sub>18</sub>NO<sub>3</sub>S [M+H]<sup>+</sup> 376.1002, found 376.1006.

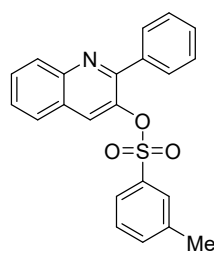

**2-phenylquinolin-3-yl 3-methylbenzenesulfonate 3ma.** Yield: 53.3 mg, 71%

(based on sulfonyl chloride **1**). White solid. m.p. 60-61 °C.  $^1\text{H NMR}$  (400 MHz,  $\text{CDCl}_3$ )  $\delta$  8.34 (s, 1H), 8.12 (d,  $J = 8.4$  Hz, 1H), 7.90 (d,  $J = 8.0$  Hz, 1H), 7.74 (ddd,  $J = 1.6, 7.2, 8.4$  Hz, 1H), 7.60 (ddd,  $J = 0.8, 7.2, 8.0$  Hz, 1H), 7.56-7.51 (m, 2H), 7.39-7.28 (m, 3H), 7.25 (d,  $J = 7.2$  Hz, 1H), 7.10 (d,  $J = 8.8$  Hz, 2H), 7.05 (dd,  $J = 7.6, 7.6$  Hz, 1H), 2.15 (s, 3H);  $^{13}\text{C NMR}$  (101 MHz,  $\text{CDCl}_3$ )  $\delta$  153.6, 146.6, 141.4, 139.4, 136.3, 135.1, 134.4, 130.2, 129.9, 129.5, 128.9, 128.6, 128.5, 128.1, 127.8, 127.7, 127.5, 125.4, 21.3; **HRMS [ESI]** calcd for  $\text{C}_{22}\text{H}_{18}\text{NO}_3\text{S}$   $[\text{M}+\text{H}]^+$  376.1002, found 376.1012.

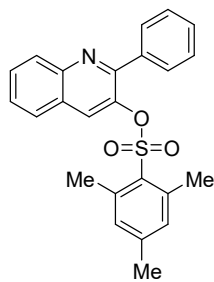

**2-phenylquinolin-3-yl 2,4,6-trimethylbenzenesulfonate 3na.** Yield: 75.8 mg, 94% (based on sulfonyl chloride **1**). White solid. m.p. 73-74 °C.  $^1\text{H NMR}$  (400 MHz,  $\text{CDCl}_3$ )  $\delta$  8.17 (s, 1H), 8.13 (d,  $J = 8.4$  Hz, 1H), 7.82 (d,  $J = 8.0$  Hz, 1H), 7.72 (dd,  $J = 7.2, 7.6$  Hz, 1H), 7.62-7.53 (m, 3H), 7.38-7.28 (m, 3H), 6.73 (s, 2H), 2.25 (s, 3H), 2.23 (s, 6H);  $^{13}\text{C NMR}$  (101 MHz,  $\text{CDCl}_3$ )  $\delta$  154.1, 146.3, 144.0, 141.4, 140.3, 136.8, 131.9, 130.4, 130.0, 129.6, 129.5, 129.3, 128.8, 128.1, 127.6, 127.5, 127.4, 23.0, 21.1; **HRMS [ESI]** calcd for  $\text{C}_{24}\text{H}_{22}\text{NO}_3\text{S}$   $[\text{M}+\text{H}]^+$  404.1315, found 404.1309.

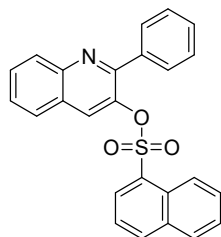

**2-phenylquinolin-3-yl naphthalene-1-sulfonate 3oa.** Yield: 68.3 mg, 83% (based on sulfonyl chloride **1**). White solid. m.p. 98-99 °C.  $^1\text{H NMR}$  (400 MHz,  $\text{CDCl}_3$ )  $\delta$  8.45 (d,  $J = 8.4$  Hz, 1H), 8.19 (s, 1H), 8.09 (d,  $J = 8.4$  Hz, 1H), 7.97 (d,  $J = 8.0$  Hz, 1H), 7.85 (d,  $J = 7.2$  Hz, 1H), 7.82 (d,  $J = 8.4$  Hz, 2H), 7.72 (dd,  $J = 7.6, 7.6$  Hz, 1H), 7.56 (dd,  $J = 6.8, 8.0$  Hz, 1H), 7.54 (dd,  $J = 6.0, 7.2$  Hz, 1H), 7.46 (dd,  $J = 7.2, 8.4$  Hz, 1H), 7.39 (d,  $J = 7.2$  Hz, 2H), 7.30 (dd,  $J = 7.6, 8.0$  Hz, 1H), 7.09-6.96 (m, 3H);  $^{13}\text{C NMR}$  (101 MHz,  $\text{CDCl}_3$ )  $\delta$  153.8, 146.4, 141.8, 136.1, 136.1, 134.1, 130.9, 130.9, 130.1, 129.5, 129.4, 129.0, 128.8, 128.6, 128.4, 127.9, 127.6, 127.5, 127.4, 127.1, 124.9, 123.7; **HRMS [ESI]** calcd for  $\text{C}_{25}\text{H}_{18}\text{NO}_3\text{S}$   $[\text{M}+\text{H}]^+$  412.1002, found 412.0998.

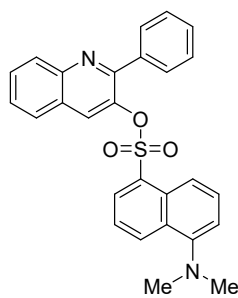

**2-phenylquinolin-3-yl 5-(dimethylamino)naphthalene-1-sulfonate 3pa.** Yield: 51.0 mg, 56% (based on sulfonyl chloride **1**). Yellow oil.  $^1\text{H NMR}$  (400 MHz,  $\text{CDCl}_3$ )  $\delta$  8.48 (d,  $J = 8.4$  Hz, 1H), 8.16 (s, 1H), 8.14 (d,  $J = 9.6$  Hz, 1H), 8.09 (d,  $J = 8.4$  Hz, 1H), 7.85 (d,  $J = 7.2$  Hz, 1H), 7.81 (d,  $J = 8.4$  Hz, 1H), 7.72 (dd,  $J = 7.2, 8.0$  Hz, 1H), 7.56 (dd,  $J = 7.6, 7.6$  Hz, 1H), 7.45 (dd,  $J = 7.2$  Hz, 2H), 7.38 (dd,  $J = 8.0, 8.4$  Hz, 1H), 7.30 (dd,  $J = 8.0, 8.0$  Hz, 1H), 7.13 (d,  $J = 7.6$  Hz, 1H), 7.11-7.01 (m, 3H), 7.08-6.96 (m, 3H), 2.88 (s, 6H);  $^{13}\text{C NMR}$  (101 MHz,  $\text{CDCl}_3$ )  $\delta$  153.9, 151.6, 146.4, 141.9, 136.3, 132.2, 131.2, 130.8, 130.1, 129.9, 129.8, 129.5, 129.4, 129.1, 128.9, 128.6, 127.9, 127.7, 127.6, 127.4, 122.8, 119.6, 115.6, 45.6; **HRMS [ESI]** calcd for  $\text{C}_{27}\text{H}_{23}\text{N}_2\text{O}_3\text{S}$   $[\text{M}+\text{H}]^+$  455.1424, found 455.1424.



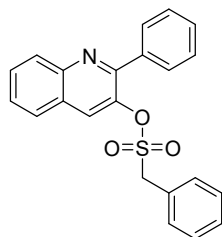

**2-phenylquinolin-3-yl phenylmethanesulfonate 3qa.** Yield: 49.5 mg, 66% (based on sulfonyl chloride **1**). White solid. m.p. 95-96 °C. **<sup>1</sup>H NMR (400 MHz, CDCl<sub>3</sub>)** δ 8.18 (d, *J* = 8.4 Hz, 1H), 8.09 (s, 1H), 7.90 (dd, *J* = 1.6, 8.4 Hz, 1H), 7.82 (d, *J* = 8.4 Hz, 1H), 7.76 (ddd, *J* = 1.6, 7.2, 8.4 Hz, 1H), 7.60 (ddd, *J* = 0.8, 7.2, 8.0 Hz, 1H), 7.57-7.49 (m, 3H), 7.40-7.30 (m, 3H), 7.26-7.20 (m, 2H), 4.07 (s, 2H); **<sup>13</sup>C NMR (101 MHz, CDCl<sub>3</sub>)** δ 153.4, 146.6, 141.4, 136.9, 130.9, 130.3, 129.8, 129.6, 129.6, 129.5, 129.1, 129.1, 128.7, 127.8, 127.7, 127.7, 126.6, 57.8; **HRMS [ESI]** calcd for C<sub>22</sub>H<sub>18</sub>NO<sub>3</sub>S [M+H]<sup>+</sup> 376.1002, found 376.1002.

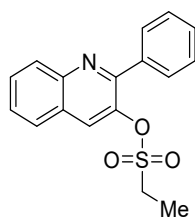

**2-phenylquinolin-3-yl ethanesulfonate 3ra.** Yield: 38.9 mg, 62% (based on sulfonyl chloride **1**). Colorless oil. **<sup>1</sup>H NMR (400 MHz, CDCl<sub>3</sub>)** δ 8.30 (s, 1H), 8.17 (d, *J* = 8.8 Hz, 1H), 7.88 (d, *J* = 8.0 Hz, 3H), 7.76 (dd, *J* = 7.2, 8.0 Hz, 1H), 7.60 (dd, *J* = 7.2, 7.6 Hz, 1H), 7.57-7.46 (m, 3H), 2.88 (q, *J* = 7.2 Hz, 2H), 1.16 (t, *J* = 7.6 Hz, 3H); **<sup>13</sup>C NMR (101 MHz, CDCl<sub>3</sub>)** δ 153.4, 146.6, 141.2, 136.9, 130.2, 129.7, 129.6, 129.5, 129.2, 128.7, 127.8, 127.7, 127.7, 46.4, 7.8; **HRMS [ESI]** calcd for C<sub>17</sub>H<sub>16</sub>NO<sub>3</sub>S [M+H]<sup>+</sup> 314.0845, found 314.0848.

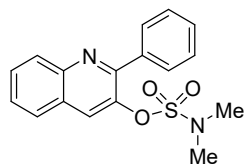

**2-phenylquinolin-3-yl dimethylsulfamate 3sa.** Yield: 26.2 mg, 40% (based on sulfonyl chloride **1**). Pale yellow solid. m.p. 50-51 °C. **<sup>1</sup>H NMR (400 MHz, CDCl<sub>3</sub>)** δ 8.34 (s, 1H), 8.16 (d, *J* = 8.4 Hz, 1H), 7.92-7.84 (m, 3H), 7.74 (dd, *J* = 7.2, 8.4 Hz, 1H), 7.59 (dd, *J* = 6.8, 8.0 Hz, 1H), 7.56-7.43 (m, 3H), 2.58 (s, 6H); **<sup>13</sup>C NMR (101 MHz, CDCl<sub>3</sub>)** δ 153.6, 146.3, 142.3, 137.1, 129.9, 129.6, 129.3, 128.5, 128.2, 127.9, 127.7, 127.5, 38.3; **HRMS [ESI]** calcd for C<sub>17</sub>H<sub>17</sub>N<sub>2</sub>O<sub>3</sub>S [M+H]<sup>+</sup> 329.0954, found 329.0952.

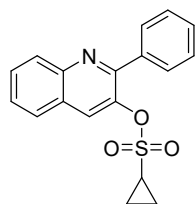

**2-phenylquinolin-3-yl cyclopropanesulfonate 3ta.** Yield: 59.2 mg, 91% (based on sulfonyl chloride **1**). Colorless solid. m.p. 94-95 °C. **<sup>1</sup>H NMR (400 MHz, CDCl<sub>3</sub>)** δ 8.27 (s, 1H), 8.18 (d, *J* = 8.4 Hz, 1H), 7.98 (d, *J* = 6.8 Hz, 2H), 7.87 (d, *J* = 8.4 Hz, 1H), 7.76 (dd, *J* = 7.6, 7.6 Hz, 1H), 7.60 (dd, *J* = 7.2, 7.6 Hz, 1H), 7.56-7.44 (m, 3H), 2.03-1.94 (m, 1H), 0.99-0.91 (m, 2H), 0.74-0.66 (m, 2H); **<sup>13</sup>C NMR (101 MHz, CDCl<sub>3</sub>)** δ 153.4, 146.7, 141.7, 137.1, 130.2, 130.0, 129.6, 129.5, 128.6, 127.8, 127.7, 127.6, 28.6, 6.3; **HRMS [ESI]** calcd for C<sub>18</sub>H<sub>16</sub>NO<sub>3</sub>S [M+H]<sup>+</sup> 326.0845, found 326.0849.

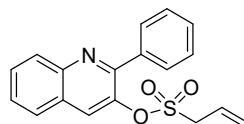

**2-phenylquinolin-3-yl prop-2-ene-1-sulfonate 3ua.** Yield: 61.8 mg, 95% (based on sulfonyl chloride **1**). Colorless oil. **<sup>1</sup>H NMR (400 MHz, CDCl<sub>3</sub>)**

$\delta$  8.28 (s, 1H), 8.18 (d,  $J = 8.4$  Hz, 1H), 7.94-7.84 (m, 3H), 7.76 (dd,  $J = 7.2, 7.6$  Hz, 1H), 7.60 (dd,  $J = 7.6, 7.6$  Hz, 1H), 7.57-7.47 (m, 3H), 5.55-5.53 (m, 1H), 5.34 (d,  $J = 10$  Hz, 1H), 5.25 (d,  $J = 16.8$  Hz, 1H), 3.57 (d,  $J = 7.2$  Hz, 2H);  $^{13}\text{C}$  NMR (101 MHz,  $\text{CDCl}_3$ )  $\delta$  153.2, 146.6, 141.2, 136.8, 130.3, 129.8, 129.6, 129.5, 129.0, 128.7, 127.7, 127.7, 125.5, 123.1, 55.9; HRMS [ESI] calcd for  $\text{C}_{18}\text{H}_{16}\text{NO}_3\text{S}$   $[\text{M}+\text{H}]^+$  326.0845 found 326.0844.

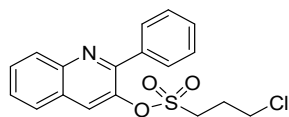

**2-phenylquinolin-3-yl 3-chloropropane-1-sulfonate 3va.** Yield: 47.7 mg, 66% (based on sulfonyl chloride **1**). Pale yellow solid 75-76 °C.  $^1\text{H}$  NMR (400 MHz,  $\text{CDCl}_3$ )  $\delta$  8.29 (s, 1H), 8.18 (d,  $J = 8.4$  Hz, 1H), 7.92-7.84 (m, 3H), 7.77 (dd,  $J = 7.2, 8.0$  Hz, 1H), 7.61 (dd,  $J = 7.2, 7.6$  Hz, 1H), 7.58-7.47 (m, 3H), 3.38 (t,  $J = 6.0$  Hz, 2H), 3.01 (t,  $J = 7.6$  Hz, 2H), 2.02-1.92 (m, 2H);  $^{13}\text{C}$  NMR (101 MHz,  $\text{CDCl}_3$ )  $\delta$  153.3, 146.7, 141.0, 136.8, 130.4, 129.8, 129.6, 129.6, 129.4, 128.8, 127.8, 127.7, 49.0, 42.2, 26.2; HRMS [ESI] calcd for  $\text{C}_{18}\text{H}_{17}\text{ClNO}_3\text{S}$   $[\text{M}+\text{H}]^+$  362.0612, found 362.0608.

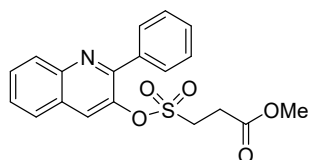

**methyl 3-(((2-phenylquinolin-3-yl)oxy)sulfonyl)propanoate 3wa.** Yield: 53.5 mg, 72% (based on sulfonyl chloride **1**). Pale yellow solid 61-62 °C.  $^1\text{H}$  NMR (400 MHz,  $\text{CDCl}_3$ )  $\delta$  8.29 (s, 1H), 8.18 (d,  $J = 8.4$  Hz, 1H), 7.88 (d,  $J = 8.4$  Hz, 1H), 7.85 (d,  $J = 6.8$  Hz, 2H), 7.77 (dd,  $J = 7.2, 8.0$  Hz, 1H), 7.61 (dd,  $J = 7.2, 8.0$  Hz, 1H), 7.57-7.47 (m, 3H), 3.66 (s, 3H), 3.18 (t,  $J = 7.6$  Hz, 2H), 2.46 (t,  $J = 7.6$  Hz, 2H);  $^{13}\text{C}$  NMR (101 MHz,  $\text{CDCl}_3$ )  $\delta$  169.9, 153.3, 146.7, 141.0, 136.7, 130.4, 129.7, 129.7, 129.6, 129.4, 128.8, 127.8, 127.8, 52.5, 46.8, 27.8; HRMS [ESI] calcd for  $\text{C}_{19}\text{H}_{18}\text{NO}_5\text{S}$   $[\text{M}+\text{H}]^+$  372.0900, found 372.0893.

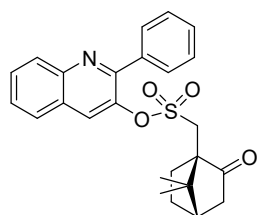

**2-phenylquinolin-3-yl ((1R,4S)-7,7-dimethyl-2-oxobicyclo[2.2.1]heptan-1-yl)methanesulfonate 3xa.** Yield: 54.0 mg, 62% (based on sulfonyl chloride **1**). White solid, m.p. 175-176 °C.  $^1\text{H}$  NMR (400 MHz,  $\text{CDCl}_3$ )  $\delta$  8.28 (s, 1H), 8.19 (d,  $J = 8.4$  Hz, 1H), 7.90 (dd,  $J = 6.8, 7.6$  Hz, 3H), 7.76 (dd,  $J = 7.2, 8.0$  Hz, 1H), 7.60 (dd,  $J = 7.6, 7.6$  Hz, 1H), 7.54 (dd,  $J = 7.2, 7.6$  Hz, 2H), 7.51-7.45 (m, 1H), 3.30 (d,  $J = 14.4$  Hz, 1H), 2.57 (d,  $J = 14.8$  Hz, 1H), 2.35-2.17 (m, 2H), 2.04 (t,  $J = 4.4$  Hz, 1H), 2.00-1.90 (m, 1H), 1.87 (d,  $J = 18.4$  Hz, 1H), 1.61-1.51 (m, 1H), 1.40-1.34 (m, 1H), 0.90 (s, 3H), 0.64 (s, 3H);  $^{13}\text{C}$  NMR (101 MHz,  $\text{CDCl}_3$ )  $\delta$  213.4, 153.5, 146.7, 141.4, 137.1, 130.3, 129.9, 129.6, 129.5, 129.5, 128.8, 127.9, 127.8, 127.6, 57.9, 49.0, 48.0, 42.8, 42.4, 27.0, 25.0, 19.7, 19.5; HRMS [ESI] calcd for  $\text{C}_{25}\text{H}_{26}\text{NO}_4\text{S}$   $[\text{M}+\text{H}]^+$  436.1577, found 436.1576.

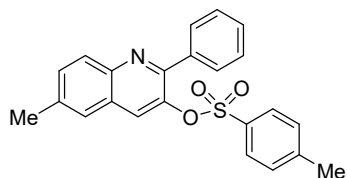

**6-methyl-2-phenylquinolin-3-yl 4-methylbenzenesulfonate 3ab.** Yield: 71.6 mg, 92% (based on sulfonyl chloride **1**). Pale yellow solid 137-138 °C.  $^1\text{H}$  NMR (400 MHz,  $\text{CDCl}_3$ )  $\delta$  8.23 (s,

1H), 7.99 (d,  $J = 8.4$  Hz, 1H), 7.65 (s, 1H), 7.57 (dd,  $J = 1.6, 8.8$  Hz, 1H), 7.52-7.47 (m, 2H), 7.38-7.27 (m, 3H), 7.15 (d,  $J = 8.4$  Hz, 2H), 6.90 (d,  $J = 8.4$  Hz, 2H), 2.57 (s, 3H), 2.33 (s, 3H);  $^{13}\text{C}$  NMR (101 MHz,  $\text{CDCl}_3$ )  $\delta$  152.6, 145.3, 145.2, 141.5, 137.6, 136.6, 132.6, 131.5, 129.5, 129.5, 129.5, 129.2, 128.8, 128.1, 128.0, 127.8, 126.5, 21.8, 21.7; HRMS [ESI] calcd for  $\text{C}_{23}\text{H}_{20}\text{NO}_3\text{S}$   $[\text{M}+\text{H}]^+$  390.1158, found 190.1161.

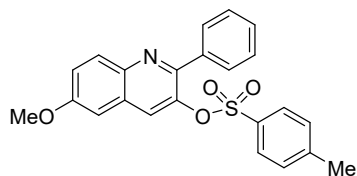

**6-methoxy-2-phenylquinolin-3-yl 4-methylbenzenesulfonate 3ac.** Yield: 53.4 mg, 66% (based on sulfonyl chloride 1). White solid, m.p. 163-164 °C.  $^1\text{H}$  NMR (400 MHz,  $\text{CDCl}_3$ )  $\delta$  8.23 (s, 1H), 7.98 (d,  $J = 9.2$  Hz, 1H), 7.49-7.

46 (m, 1H), 7.46 (d,  $J = 2.0$  Hz, 1H), 7.38 (dd,  $J = 2.8, 9.6$  Hz, 1H), 7.35-7.27 (m, 3H), 7.17-7.11 (m, 3H), 6.90 (d,  $J = 8.0$  Hz, 2H), 3.97 (s, 3H), 2.33 (s, 3H);  $^{13}\text{C}$  NMR (101 MHz,  $\text{CDCl}_3$ )  $\delta$  154.1, 146.0, 145.0, 140.1, 139.5, 137.8, 132.5, 130.2, 129.7, 129.6, 129.5, 128.6, 128.2, 128.1, 128.1, 127.1, 124.5, 21.8, 14.0; HRMS [ESI] calcd for  $\text{C}_{23}\text{H}_{20}\text{NO}_4\text{S}$   $[\text{M}+\text{H}]^+$  406.1108, found 406.1110.

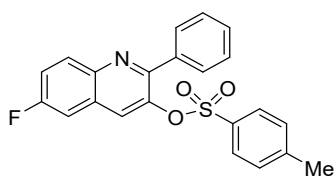

**6-fluoro-2-phenylquinolin-3-yl 4-methylbenzenesulfonate 3ad.**

Yield: 54.3 mg, 69% (based on sulfonyl chloride 1). Pale yellow solid 184-185 °C.  $^1\text{H}$  NMR (400 MHz,  $\text{CDCl}_3$ )  $\delta$  8.26 (s, 1H), 8.09 (dd,  $J = 8.8$  Hz, 1H), 7.87 (d,  $J = 2.0$  Hz, 1H), 7.67 (dd,  $J = 2.4, 9.2$  Hz, 1H), 7.51 (d,  $J = 7.2$  Hz, 1H), 7.40-7.28 (m, 3H), 7.17 (d,  $J =$

8.0 Hz, 2H), 6.93 (d,  $J = 8.4$  Hz, 2H), 2.34 (s, 3H);  $^{13}\text{C}$  NMR (101 MHz,  $\text{CDCl}_3$ )  $\delta$  161.1 (d,  $J_{\text{C-F}} = 248.6$  Hz), 152.9 (d,  $J_{\text{C-F}} = 3.0$  Hz), 145.4, 143.8, 142.1, 136.2, 132.1 (d,  $J_{\text{C-F}} = 9.4$  Hz), 131.4, 129.6, 129.5, 129.4, 129.0, 128.5 (d,  $J_{\text{C-F}} = 10.5$  Hz), 128.1, 128.1, 120.5 (d,  $J_{\text{C-F}} = 25.7$  Hz), 110.8 (d,  $J_{\text{C-F}} = 22.2$  Hz), 21.8;  $^{19}\text{F}$  NMR (377 MHz,  $\text{CDCl}_3$ )  $\delta$  -111.8 (s); HRMS [ESI] calcd for  $\text{C}_{22}\text{H}_{17}\text{FNO}_3\text{S}$   $[\text{M}+\text{H}]^+$  394.0908, found 394.0904.

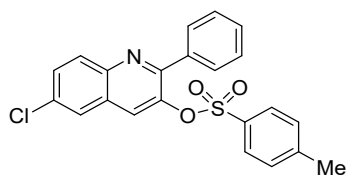

**6-chloro-2-phenylquinolin-3-yl 4-methylbenzenesulfonate 3ae.**

Yield: 50.8 mg, 62% (based on sulfonyl chloride 1). Pale yellow solid 163-164 °C.  $^1\text{H}$  NMR (400 MHz,  $\text{CDCl}_3$ )  $\delta$  8.22 (s, 1H), 8.03 (d,  $J = 8.8$  Hz, 1H), 7.54-7.47 (m, 4H), 7.40-7.28 (m, 3H), 7.17 (d,  $J = 8.4$  Hz, 2H), 6.93 (d,  $J = 8.4$  Hz, 2H), 2.34 (s, 3H);  $^{13}\text{C}$

NMR (101 MHz,  $\text{CDCl}_3$ )  $\delta$  153.9, 145.5, 145.0, 142.1, 136.2, 133.4, 131.4, 131.2, 131.1, 129.6, 129.6, 129.2, 128.3, 128.2, 128.1, 126.3, 21.8; HRMS [ESI] calcd for  $\text{C}_{22}\text{H}_{17}\text{ClNO}_3\text{S}$   $[\text{M}+\text{H}]^+$  410.0612, found 410.0623.

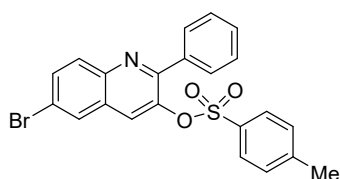

**6-bromo-2-phenylquinolin-3-yl 4-methylbenzenesulfonate 3af.**

Yield: 60.7 mg, 67% (based on sulfonyl chloride 1). Pale yellow solid 168-169 °C.  $^1\text{H}$  NMR (400 MHz,  $\text{CDCl}_3$ )  $\delta$  8.22 (s, 1H), 8.05 (d,  $J = 2.0$  Hz, 1H), 7.96 (d,  $J = 9.2$  Hz, 1H), 7.80 (dd,  $J = 2.0, 8.8$

Hz, 1H), 7.54-7.49 (m, 2H), 7.40-7.29 (m, 3H), 7.17 (d,  $J = 8.4$  Hz, 2H), 6.93 (d,  $J = 8.0$  Hz, 2H), 2.34 (s, 3H);  $^{13}\text{C NMR}$  (101 MHz,  $\text{CDCl}_3$ )  $\delta$  154.0, 145.5, 145.2, 142.0, 136.2, 133.7, 131.4, 131.2, 129.7, 129.6, 129.6, 129.2, 129.1, 128.8, 128.2, 128.1, 121.6, 21.8; **HRMS [ESI]** calcd for  $\text{C}_{22}\text{H}_{17}\text{BrNO}_3\text{S}$   $[\text{M}+\text{H}]^+$  454.0107, found 454.0110.

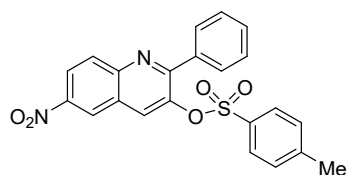

**6-nitro-2-phenylquinolin-3-yl 4-methylbenzenesulfonate 3ag.**

Yield: 59.7 mg, 71% (based on sulfonyl chloride **1**). Yellow solid 172-173 °C.  $^1\text{H NMR}$  (400 MHz,  $\text{CDCl}_3$ )  $\delta$  8.85 (d,  $J = 2.4$  Hz, 1H), 8.49 (dd,  $J = 2.4, 9.2$  Hz, 1H), 8.46 (s, 1H), 8.22 (d,  $J = 9.2$  Hz, 1H), 7.62-7.57 (m, 2H), 7.45-7.40 (m, 1H), 7.39-7.33 (m, 2H),

7.21 (d,  $J = 8.4$  Hz, 2H), 6.97 (d,  $J = 8.0$  Hz, 2H), 2.36 (s, 3H);  $^{13}\text{C NMR}$  (101 MHz,  $\text{CDCl}_3$ )  $\delta$  157.2, 148.4, 146.1, 145.8, 142.8, 135.7, 131.6, 131.4, 131.3, 129.9, 129.7, 128.3, 128.2, 126.6, 124.5, 123.6, 21.8; **HRMS [ESI]** calcd for  $\text{C}_{22}\text{H}_{17}\text{N}_2\text{O}_5\text{S}$   $[\text{M}+\text{H}]^+$  421.0853, found 421.0845.

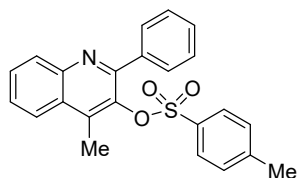

**4-methyl-2-phenylquinolin-3-yl 4-methylbenzenesulfonate 3ah.**

Yield: 48.3 mg, 62% (based on sulfonyl chloride **1**). Pale yellow solid 85-86 °C.  $^1\text{H NMR}$  (400 MHz,  $\text{CDCl}_3$ )  $\delta$  8.11 (d,  $J = 8.4$  Hz, 1H), 8.04 (d,  $J = 8.4$  Hz, 1H), 7.73 (ddd,  $J = 1.2, 7.2, 8.0$  Hz, 1H), 7.61 (ddd,  $J = 0.8, 7.2, 8.0$  Hz, 1H), 7.54-7.49 (m, 2H), 7.29-7.17 (m, 5H), 6.95 (d,  $J = 8.0$  Hz, 2H), 2.85 (s, 3H), 2.36 (s, 3H);  $^{13}\text{C NMR}$  (101 MHz,  $\text{CDCl}_3$ )  $\delta$  154.0, 146.0, 145.0, 140.1,

139.5, 137.8, 132.5, 130.2, 129.7, 129.6, 129.5, 128.5, 128.2, 128.1, 128.0, 127.1, 124.5, 21.8, 14.0. **HRMS [ESI]** calcd for  $\text{C}_{23}\text{H}_{20}\text{NO}_3\text{S}$   $[\text{M}+\text{H}]^+$  390.1158, found 390.1159.

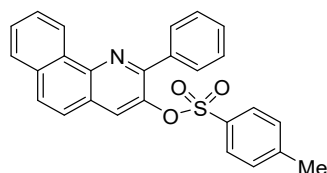

**2-phenylbenzo[h]quinolin-3-yl 4-methylbenzenesulfonate 3ai.**

Yield: 72.3 mg, 85% (based on sulfonyl chloride **1**). Pale yellow solid 129-130 °C.  $^1\text{H NMR}$  (400 MHz,  $\text{CDCl}_3$ )  $\delta$  9.26 (dd,  $J = 3.6, 6.0$  Hz, 1H), 8.34 (s, 1H), 7.92 (dd,  $J = 3.2, 5.6$  Hz, 1H), 7.86 (d,  $J = 8.8$  Hz, 1H), 7.74 (d,  $J = 8.8$  Hz, 1H), 7.73-7.67 (m, 4H), 7.42-7.31 (m, 3H), 7.18 (d,  $J = 8.4$  Hz, 2H), 6.88 (d,  $J = 8.4$  Hz, 2H), 2.31 (s, 3H);  $^{13}\text{C NMR}$  (101 MHz,  $\text{CDCl}_3$ )  $\delta$  151.0, 145.3, 144.8,

142.2, 136.8, 133.9, 131.3, 131.2, 130.4, 129.9, 129.4, 129.0, 128.8, 128.7, 128.2, 128.0, 127.9, 127.4, 126.1, 124.9, 124.8, 21.7. **HRMS [ESI]** calcd for  $\text{C}_{26}\text{H}_{20}\text{NO}_3\text{S}$   $[\text{M}+\text{H}]^+$  426.1158, found 426.1150.

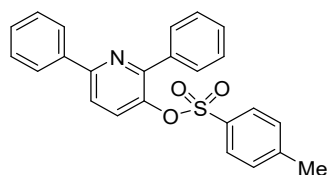

**2,6-diphenylpyridin-3-yl 4-methylbenzenesulfonate 3aj.**

Yield: 65.8 mg, 82% (based on sulfonyl chloride **1**). Colorless oil.  $^1\text{H NMR}$  (400 MHz,  $\text{CDCl}_3$ )  $\delta$  8.06 (d,  $J = 6.8$  Hz, 1H), 7.91 (d,  $J = 8.4$  Hz, 1H), 7.76 (d,  $J = 8.4$  Hz, 1H), 7.57-7.52 (m, 2H), 7.50-7.40 (m, 3H),

7.34-7.26 (m, 3H), 7.21 (d,  $J = 8.0$  Hz, 2H), 6.91 (d,  $J = 8.4$  Hz, 2H), 2.32 (s, 3H);  $^{13}\text{C NMR}$  (101

**MHz, CDCl<sub>3</sub>)**  $\delta$  155.5, 151.5, 145.3, 143.0, 138.2, 136.4, 133.2, 131.3, 129.5, 129.4, 128.9, 128.7, 128.2, 127.9, 127.1, 119.6, 21.7; **HRMS [ESI]** calcd for C<sub>24</sub>H<sub>20</sub>NO<sub>3</sub>S [M+H]<sup>+</sup> 402.1158, found 402.1152.

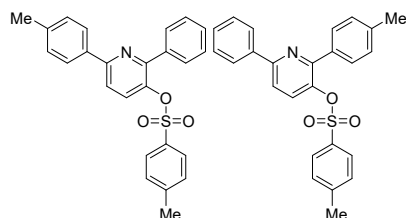

**2-phenyl-6-(p-tolyl)pyridin-3-yl 4-methylbenzenesulfonate/6-phenyl-2-(p-tolyl)pyridin-3-yl 4-methylbenzenesulfonate 3ak.** Yield: 60.6 mg, 73% (based on sulfonyl chloride 1). Colorless solid 102-103 °C. **<sup>1</sup>H NMR (400 MHz, CDCl<sub>3</sub>)**  $\delta$  8.05 (d, *J* = 6.8 Hz, 1H), 7.95 (d, *J* =

8.0 Hz, 1H), 7.87 (dd, *J* = 6.8, 8.4 Hz, 1H), 7.72 (d, *J* = 8.8 Hz, 1H), 7.59-7.53 (m, 1H), 7.51-7.40 (m, 2H), 7.35-7.19 (m, 5H), 7.10 (d, *J* = 8.0 Hz, 1H), 6.93 (dd, *J* = 6.8, 7.2 Hz, 2H), 2.40 (d, *J* = 4.2 Hz, 3H), 2.33 (d, *J* = 4.2 Hz, 3H); **<sup>13</sup>C NMR (101 MHz, CDCl<sub>3</sub>)**  $\delta$  155.5&155.4 (two isomers), 151.6&151.4 (two isomers), 145.3&145.2 (two isomers), 143.0&142.8 (two isomers), 139.6&133.7 (two isomers), 138.7&138.4 (two isomers), 136.5 &135.5 (two isomers), 133.0&132.9 (two isomers), 131.7&131.5 (two isomers), 129.6&129.5 (two isomers), 129.4 (overlap, two isomers), 129.4&128.7 (two isomers), 129.4&128.8 (two isomers), 128.6&128.3 (two isomers), 128.3&127.9 (two isomers), 127.1&127.0 (two isomers), 119.3&119.2 (two isomers), 21.7&21.7 (two isomers), 21.4&21.4 (two isomers); **HRMS [ESI]** calcd for C<sub>25</sub>H<sub>22</sub>NO<sub>3</sub>S [M+H]<sup>+</sup> 416.1315, found 416.1313.

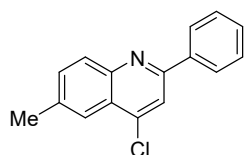

**4-chloro-6-methyl-2-phenylquinoline 4ab.** Yield: 30.9 mg, 61% (based on sulfonyl chloride 1). Pale yellow solid 68-69 °C. **<sup>1</sup>H NMR (400 MHz, CDCl<sub>3</sub>)**  $\delta$  8.15-8.10 (m, 2H), 8.07 (d, *J* = 8.8 Hz, 1H), 7.98 (s, 1H), 7.93 (s, 1H), 7.60 (dd, *J* = 2.0, 8.8 Hz, 1H), 7.56-7.44 (m, 3H), 2.59 (s, 3H); **<sup>13</sup>C NMR (101 MHz, CDCl<sub>3</sub>)**  $\delta$  156.4, 147.8, 142.5, 138.8, 137.5, 132.9, 129.9, 129.7, 129.0, 127.5, 125.3, 122.9, 119.2, 22.0; **HRMS [ESI]** calcd for C<sub>16</sub>H<sub>13</sub>ClN [M+H]<sup>+</sup> 254.0731, found 254.0735.

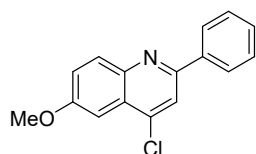

**4-chloro-6-methoxy-2-phenylquinoline 4ac.** Yield: 27.5 mg, 51% (based on sulfonyl chloride 1). Colorless oil. **<sup>1</sup>H NMR (400 MHz, CDCl<sub>3</sub>)**  $\delta$  8.13-8.09 (m, 2H), 8.07 (d, *J* = 8.8 Hz, 1H), 7.93 (s, 1H), 7.52 (dd, *J* = 7.2, 7.6 Hz, 2H), 7.49-7.39 (m, 3H), 3.98 (s, 3H); **<sup>13</sup>C NMR (101 MHz, CDCl<sub>3</sub>)**  $\delta$  158.7, 154.9, 145.2, 141.6, 138.8, 131.8, 129.5, 129.0, 127.3, 126.4, 123.5, 119.4, 101.7, 55.8; **HRMS [ESI]** calcd for C<sub>16</sub>H<sub>13</sub>ClNO [M+H]<sup>+</sup> 270.0680, found 270.0685.

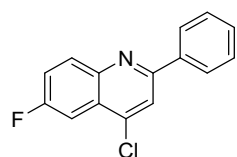

**4-chloro-6-fluoro-2-phenylquinoline 4ad.** Yield: 34.0 mg, 66% (based on sulfonyl chloride 1). Pale yellow solid 91-92 °C. **<sup>1</sup>H NMR (400 MHz, CDCl<sub>3</sub>)**  $\delta$  8.18 (dd, *J* = 5.6, 9.2 Hz, 1H), 8.14-8.10 (m, 2H), 7.99 (s, 1H), 7.84 (dd, *J* = 2.8, 9.2 Hz, 1H), 7.58-7.46 (m, 4H); **<sup>13</sup>C NMR (101 MHz, CDCl<sub>3</sub>)**  $\delta$  161.2 (d, *J*<sub>C-F</sub> = 247.9 Hz), 156.8 (d, *J*<sub>C-F</sub> = 2.9 Hz), 146.2, 142.4, 138.4, 132.8 (d, *J*<sub>C-F</sub> =

9.1 Hz), 130.0, 129.1, 127.5, 126.3 (d,  $J_{C-F} = 10.2$  Hz), 121.0 (d,  $J_{C-F} = 25.6$  Hz), 119.8, 107.9 (d,  $J_{C-F} = 24.2$  Hz);  **$^{19}\text{F}$ NMR (377 MHz,  $\text{CDCl}_3$ )  $\delta$  -111.2 (s); HRMS [ESI] calcd for  $\text{C}_{15}\text{H}_{10}\text{ClFN}$   $[\text{M}+\text{H}]^+$  258.0480, found 258.0480**

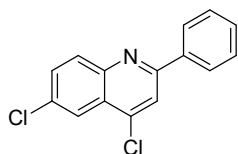

**4,6-dichloro-2-phenylquinoline 4ae.** Yield: 28.4 mg, 52% (based on sulfonyl chloride **1**). Pale yellow solid 104-105. °C.  **$^1\text{H}$  NMR (400 MHz,  $\text{CDCl}_3$ )  $\delta$  8.18 (d,  $J = 2.0$  Hz, 1H), 8.12 (d,  $J = 6.8$  Hz, 2H), 8.09 (d,  $J = 12.0$  Hz, 1H), 7.97 (s, 1H), 7.69 (dd,  $J = 2.0, 8.8$  Hz, 1H), 7.56-7.46 (m, 3H);  $^{13}\text{C}$  NMR (101 MHz,  $\text{CDCl}_3$ )  $\delta$  157.5, 147.5, 142.2, 138.2, 133.4, 131.8, 131.6, 130.2, 129.1, 127.6, 126.1, 123.1, 119.9; HRMS [ESI] calcd for  $\text{C}_{15}\text{H}_{10}\text{Cl}_2\text{N}$   $[\text{M}+\text{H}]^+$  274.0185, found 274.0191.**

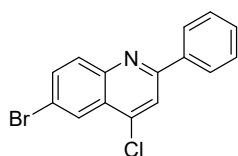

**6-bromo-4-chloro-2-phenylquinoline 4af.** Yield: 29.8 mg, 47% (based on sulfonyl chloride **1**). Pale yellow solid 113-114 °C.  **$^1\text{H}$  NMR (400 MHz,  $\text{CDCl}_3$ )  $\delta$  8.36 (d,  $J = 2.0$  Hz, 1H), 8.12 (dd,  $J = 1.6, 8.4$  Hz, 2H), 8.02 (d,  $J = 9.2$  Hz, 1H), 7.96 (s, 1H), 7.82 (dd,  $J = 2.0, 8.8$  Hz, 1H), 7.56-7.48 (m, 3H);  $^{13}\text{C}$  NMR (101 MHz,  $\text{CDCl}_3$ )  $\delta$  157.7, 147.7, 142.0, 138.2, 134.2, 131.8, 130.2, 129.1, 127.6, 126.5, 126.4, 121.6, 121.5; HRMS [ESI] calcd for  $\text{C}_{15}\text{H}_{10}\text{BrClN}$   $[\text{M}+\text{H}]^+$  317.9680, found 317.9678.**

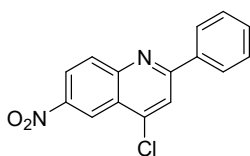

**4-chloro-6-nitro-2-phenylquinoline 4ag.** Yield: 21.1 mg, 37% (based on sulfonyl chloride **1**). Pale yellow solid 152-153 °C.  **$^1\text{H}$  NMR (400 MHz,  $\text{CDCl}_3$ )  $\delta$  9.15 (d,  $J = 2.4$  Hz, 1H), 8.51 (dd,  $J = 2.4, 9.2$  Hz, 1H), 8.27 (d,  $J = 9.2$  Hz, 1H), 8.21-8.15 (m, 2H), 8.10 (s, 1H), 7.60-7.52 (m, 3H);  $^{13}\text{C}$  NMR (101 MHz,  $\text{CDCl}_3$ )  $\delta$  160.6, 151.2, 145.9, 144.0, 137.5, 132.0, 131.1, 129.3, 127.9, 124.7, 124.2, 121.3, 120.7; HRMS [ESI] calcd for  $\text{C}_{15}\text{H}_{10}\text{ClN}_2\text{O}_2$   $[\text{M}+\text{H}]^+$  285.0425, found 285.0425.**

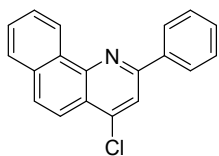

**4-chloro-2-phenylbenzo[h]quinolone 4ai.** Yield: 37.6 mg, 65% (based on sulfonyl chloride **1**). White solid 94-95 °C.  **$^1\text{H}$  NMR (400 MHz,  $\text{CDCl}_3$ )  $\delta$  9.48 (d,  $J = 8.0$  Hz, 1H), 8.32 (d,  $J = 7.6$  Hz, 2H), 8.13 (d,  $J = 9.2$  Hz, 1H), 8.09 (s, 1H), 7.94 (d,  $J = 8.0$  Hz, 1H), 7.89 (d,  $J = 9.2$  Hz, 1H), 7.80-7.71 (m, 2H), 7.58 (dd,  $J = 7.2, 7.6$  Hz, 2H), 7.51 (dd,  $J = 7.2, 7.2$  Hz, 1H);  $^{13}\text{C}$  NMR (101 MHz,  $\text{CDCl}_3$ )  $\delta$  155.7, 147.5, 143.1, 138.8, 134.1, 131.7, 129.9, 129.1, 128.9, 128.6, 128.0, 127.6, 127.5, 125.4, 123.3, 121.0, 119.3. HRMS [ESI] calcd for  $\text{C}_{19}\text{H}_{13}\text{ClN}$   $[\text{M}+\text{H}]^+$  290.0731, found 290.0740.**

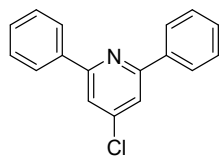

**4-chloro-2,6-diphenylpyridine 4aj.** Yield: 31.3 mg, 59% (based on sulfonyl chloride **1**). Pale yellow solid 109-110 °C.  **$^1\text{H}$  NMR (400 MHz,  $\text{CDCl}_3$ )  $\delta$  8.16-8.10 (m, 4H), 7.69 (s, 2H), 7.54-7.43 (m, 6H);  $^{13}\text{C}$  NMR (101 MHz,  $\text{CDCl}_3$ )  $\delta$  158.4, 145.5, 138.4, 129.8, 128.9, 127.2, 118.9; HRMS [ESI] calcd for  $\text{C}_{17}\text{H}_{13}\text{ClN}$   $[\text{M}+\text{H}]^+$  266.0731, found 266.0735.**

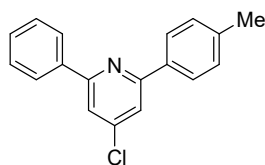

**4-chloro-2-phenyl-6-(p-tolyl)pyridine 4ak.** Yield: 34.1 mg, 61% (based on sulfonyl chloride **1**). White solid 54-55 °C. **<sup>1</sup>H NMR (400 MHz, CDCl<sub>3</sub>)** δ 8.12 (d, *J* = 6.8 Hz, 2H), 8.03 (d, *J* = 8.4 Hz, 2H), 7.66 (s, 2H), 7.54-7.42 (m, 3H), 7.31 (d, *J* = 8.0 Hz, 2H), 2.43 (s, 3H); **<sup>13</sup>C NMR (101 MHz, CDCl<sub>3</sub>)** δ 158.4, 158.3, 145.4, 139.9, 138.6, 135.7, 129.7, 128.9, 127.2, 127.1, 118.6, 118.5, 21.5; **HRMS [ESI]** calcd for C<sub>18</sub>H<sub>15</sub>ClN [M+H]<sup>+</sup> 280.0888, found 280.0885.

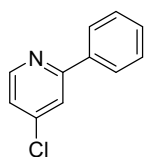

**4-chloro-2-phenylpyridine 4al.** Yield: 18.2 mg, 48% (based on sulfonyl chloride **1**). Colorless oil. **<sup>1</sup>H NMR (400 MHz, CDCl<sub>3</sub>)** δ 8.00 (dd, *J* = 1.6, 8.4 Hz, 2H), 7.70 (dd, *J* = 7.6, 7.6 Hz, 1H), 7.65 (d, *J* = 7.6 Hz, 1H), 7.51-7.41 (m, 3H), 7.26 (d, *J* = 7.6 Hz, 1H); **<sup>13</sup>C NMR (101 MHz, CDCl<sub>3</sub>)** δ 158.2, 151.5, 139.4, 137.8, 129.7, 128.9, 127.1, 122.7, 118.8; **HRMS [ESI]** calcd for C<sub>11</sub>H<sub>9</sub>ClN [M+H]<sup>+</sup> 190.0418, found 190.0427.

## 5. Spectroscopic data for products

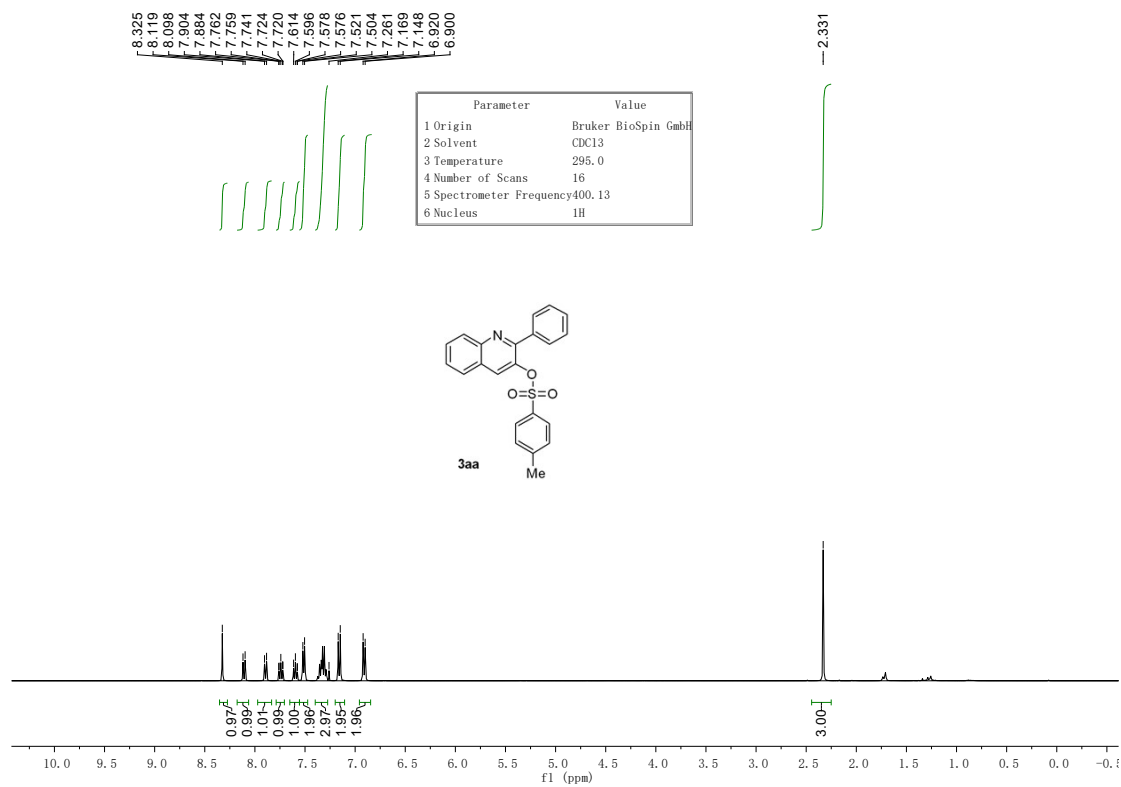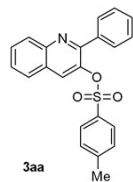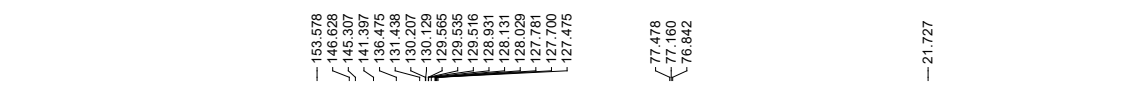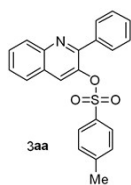

| Parameter                | Value               |
|--------------------------|---------------------|
| 1 Origin                 | Bruker BioSpin GmbH |
| 2 Solvent                | CDCl3               |
| 3 Temperature            | 295.1               |
| 4 Number of Scans        | 37                  |
| 5 Spectrometer Frequency | 100.61              |
| 6 Nucleus                | <sup>13</sup> C     |

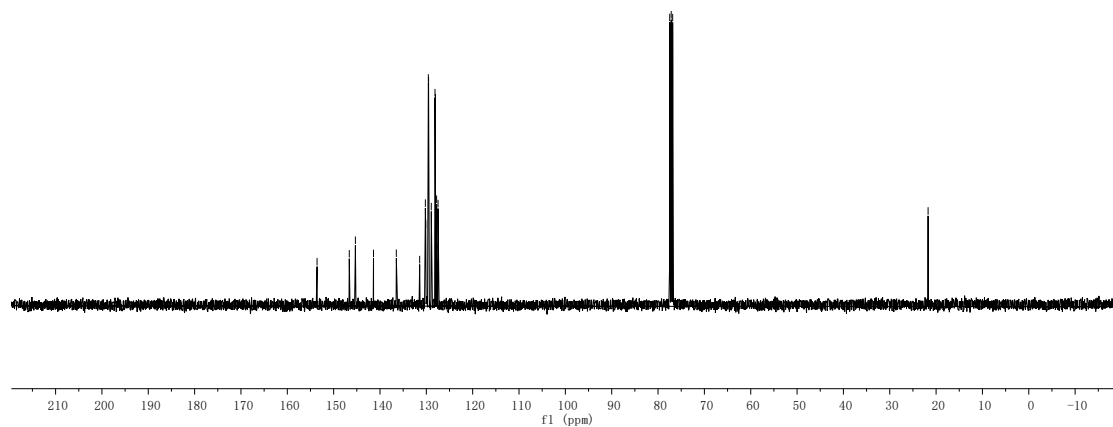



8.366  
8.345  
8.328  
8.162  
8.140  
8.121  
8.102  
7.938  
7.918  
7.900  
7.882  
7.779  
7.744  
7.724  
7.632  
7.614  
7.596  
7.528  
7.510  
7.484  
7.465  
7.447  
7.429  
7.350  
7.321  
7.313  
7.281  
7.167  
7.146  
7.131

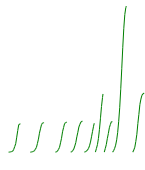

| Parameter                | Value               |
|--------------------------|---------------------|
| 1 Origin                 | Bruker BioSpin GmbH |
| 2 Solvent                | CDCl3               |
| 3 Temperature            | 295.1               |
| 4 Number of Scans        | 4                   |
| 5 Spectrometer Frequency | 400.13              |
| 6 Nucleus                | 1H                  |

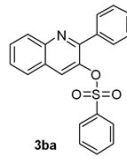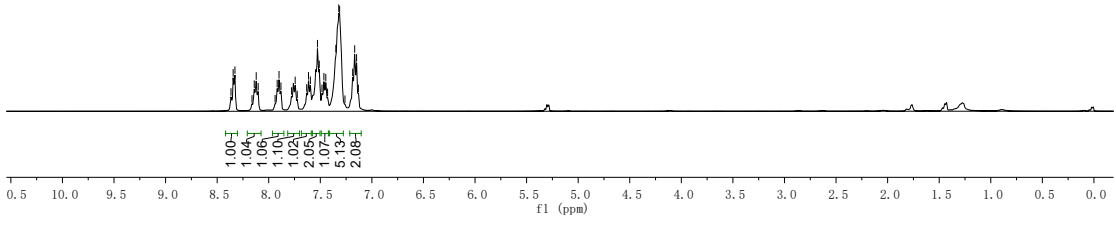

1.001  
1.061  
1.061  
1.101  
1.021  
2.051  
1.071  
5.131  
2.081

| Parameter                | Value               |
|--------------------------|---------------------|
| 1 Origin                 | Bruker BioSpin GmbH |
| 2 Solvent                | CDCl3               |
| 3 Temperature            | 295.6               |
| 4 Number of Scans        | 35                  |
| 5 Spectrometer Frequency | 100.61              |
| 6 Nucleus                | 13C                 |

153.527  
146.641  
141.326  
136.387  
134.566  
134.123  
130.241  
129.953  
129.544  
129.532  
128.904  
128.245  
128.128  
127.758  
127.652  
127.505

77.478  
77.160  
76.842

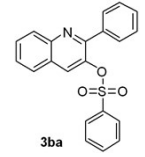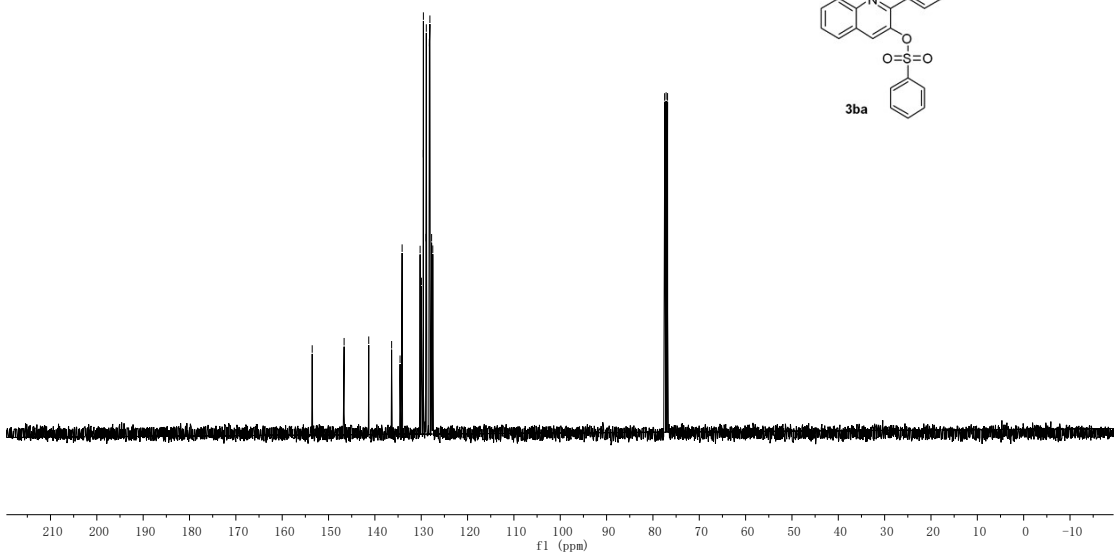

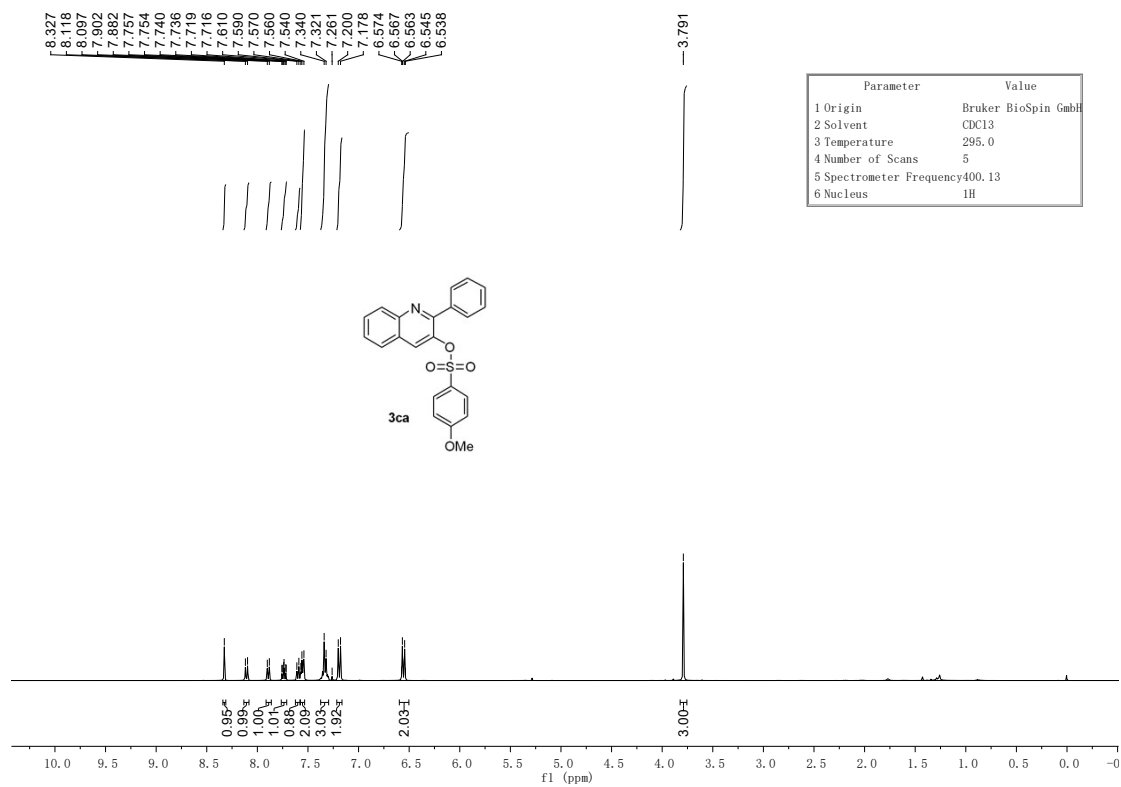

| Parameter                | Value               |
|--------------------------|---------------------|
| 1 Origin                 | Bruker BioSpin GmbH |
| 2 Solvent                | CDCl3               |
| 3 Temperature            | 295.0               |
| 4 Number of Scans        | 5                   |
| 5 Spectrometer Frequency | 400.13              |
| 6 Nucleus                | 1H                  |

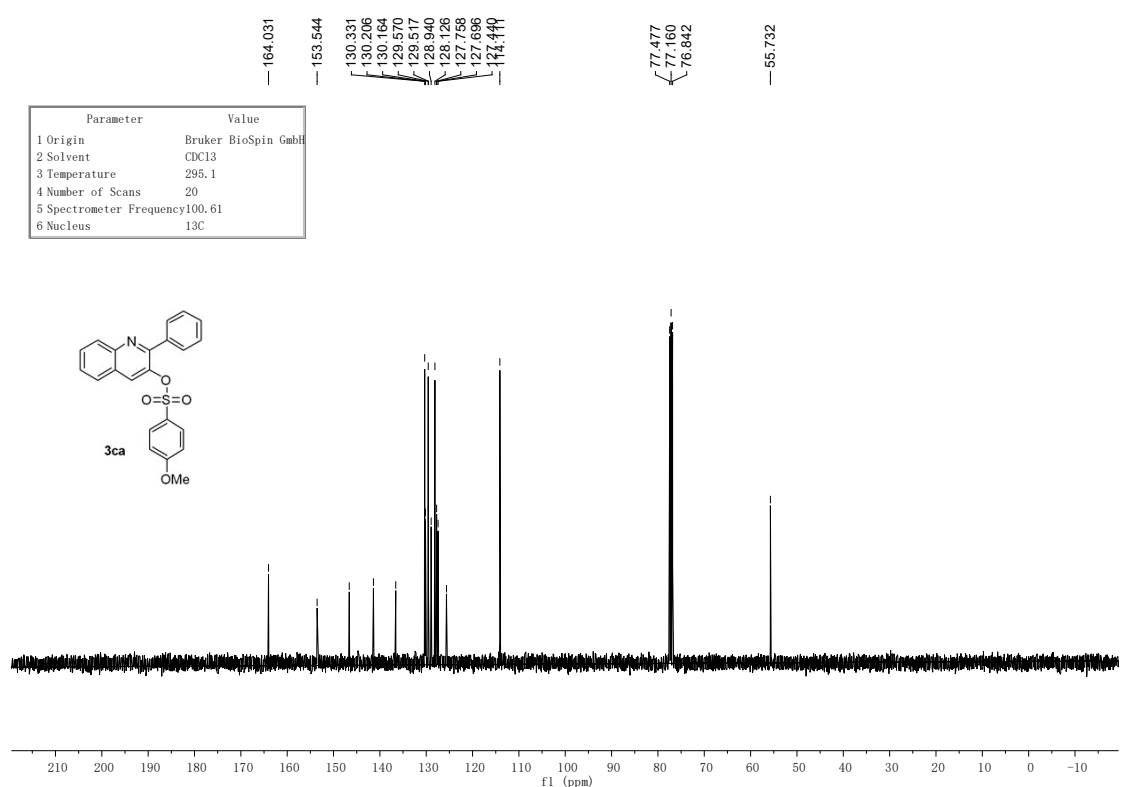

| Parameter                | Value               |
|--------------------------|---------------------|
| 1 Origin                 | Bruker BioSpin GmbH |
| 2 Solvent                | CDCl3               |
| 3 Temperature            | 295.1               |
| 4 Number of Scans        | 20                  |
| 5 Spectrometer Frequency | 100.61              |
| 6 Nucleus                | 13C                 |

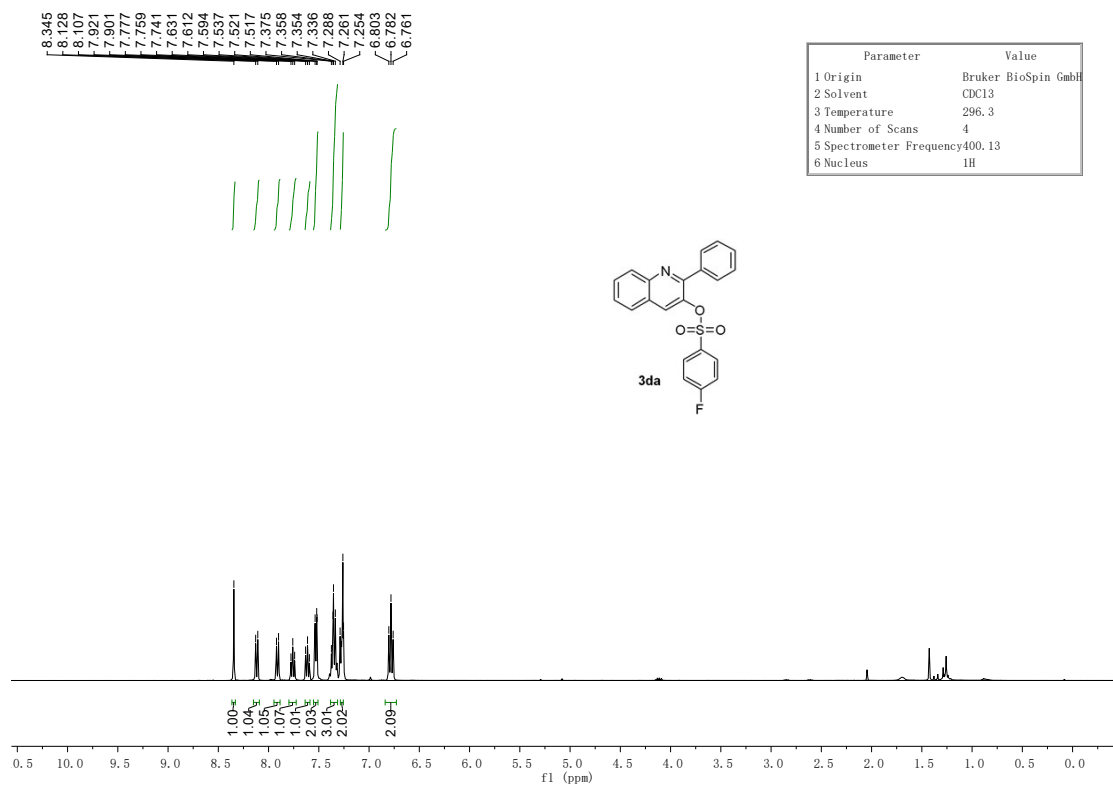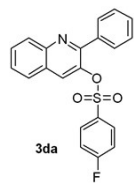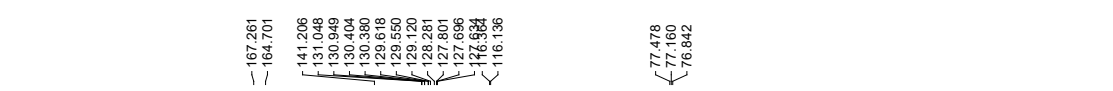

| Parameter                | Value               |
|--------------------------|---------------------|
| 1 Origin                 | Bruker BioSpin GmbH |
| 2 Solvent                | CDCl3               |
| 3 Temperature            | 296.7               |
| 4 Number of Scans        | 40                  |
| 5 Spectrometer Frequency | 100.61              |
| 6 Nucleus                | 13C                 |

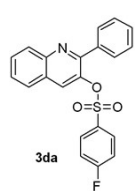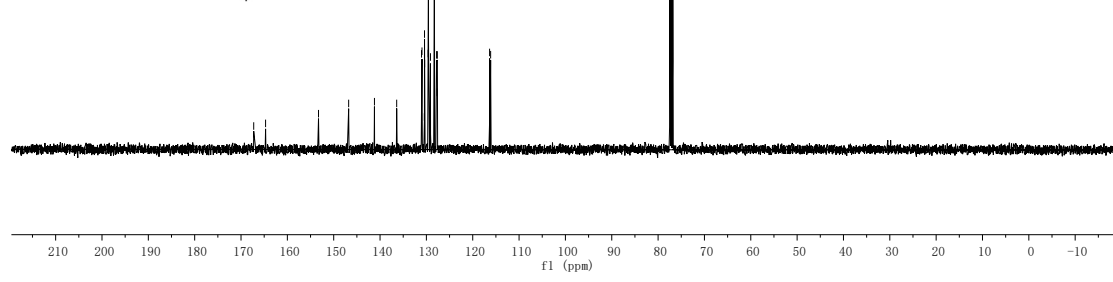

| Parameter                | Value               |
|--------------------------|---------------------|
| 1 Origin                 | Bruker BioSpin GmbH |
| 2 Solvent                | CDCl3               |
| 3 Temperature            | 292.0               |
| 4 Number of Scans        | 4                   |
| 5 Spectrometer Frequency | 376.50              |
| 6 Nucleus                | <sup>19</sup> F     |

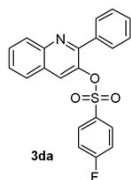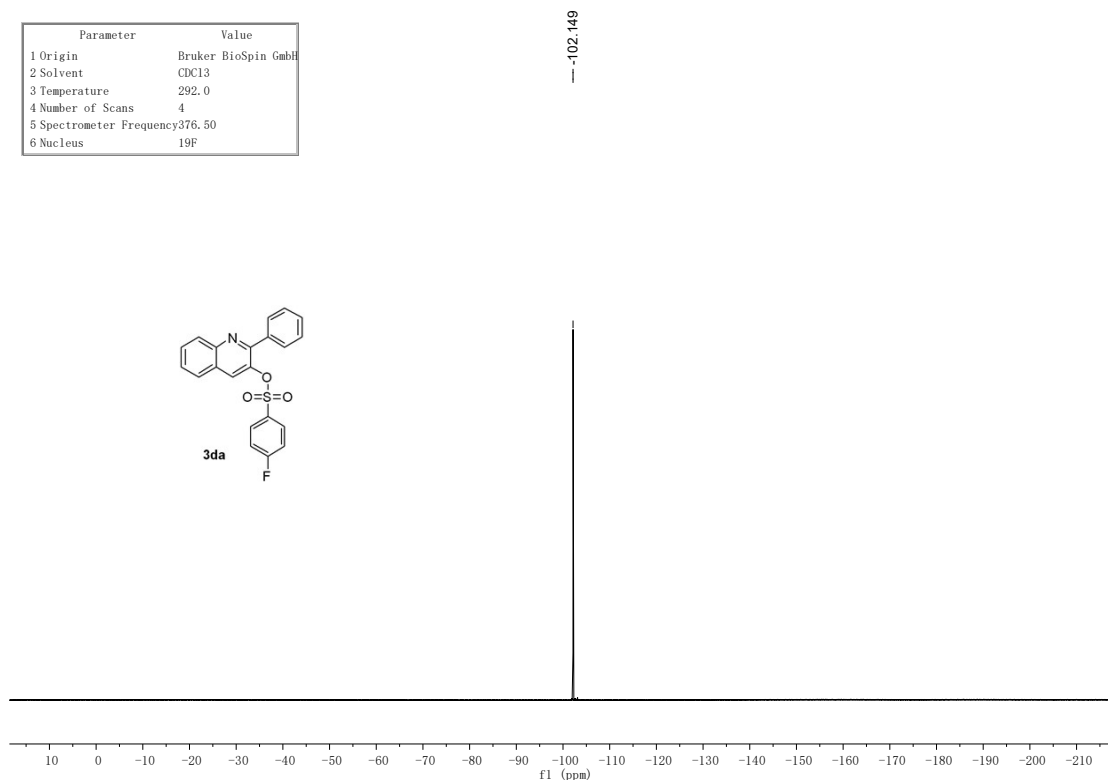

8.340  
8.128  
8.106  
7.918  
7.898  
7.776  
7.736  
7.731  
7.738  
7.628  
7.610  
7.590  
7.501  
7.485  
7.481  
7.398  
7.363  
7.355  
7.337  
7.320  
7.261  
7.174  
7.153  
7.065  
7.044

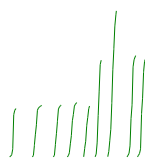

| Parameter                | Value               |
|--------------------------|---------------------|
| 1 Origin                 | Bruker BioSpin GmbH |
| 2 Solvent                | CDCl3               |
| 3 Temperature            | 294.8               |
| 4 Number of Scans        | 4                   |
| 5 Spectrometer Frequency | 400.13              |
| 6 Nucleus                | <sup>1</sup> H      |

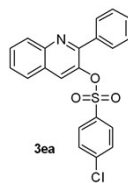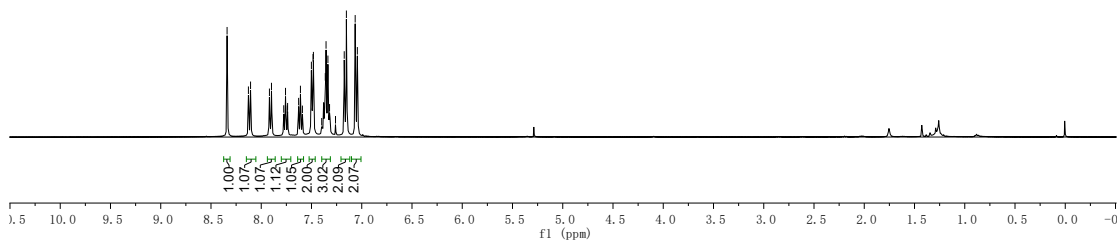

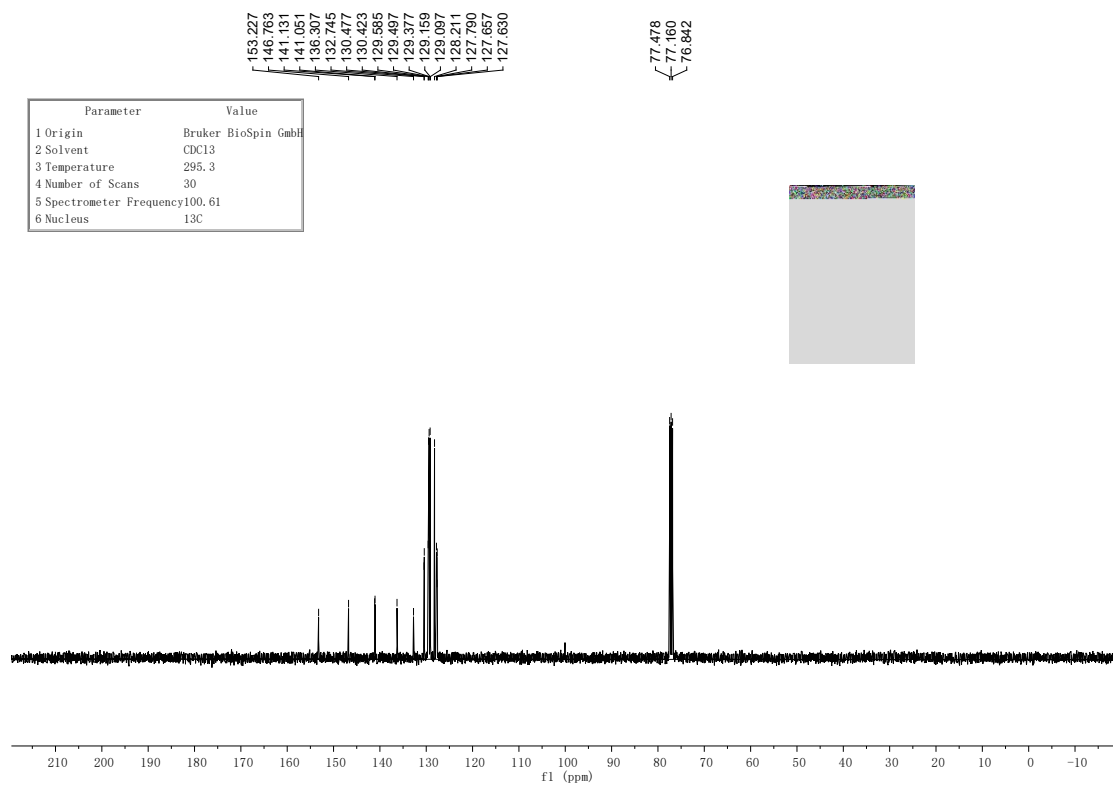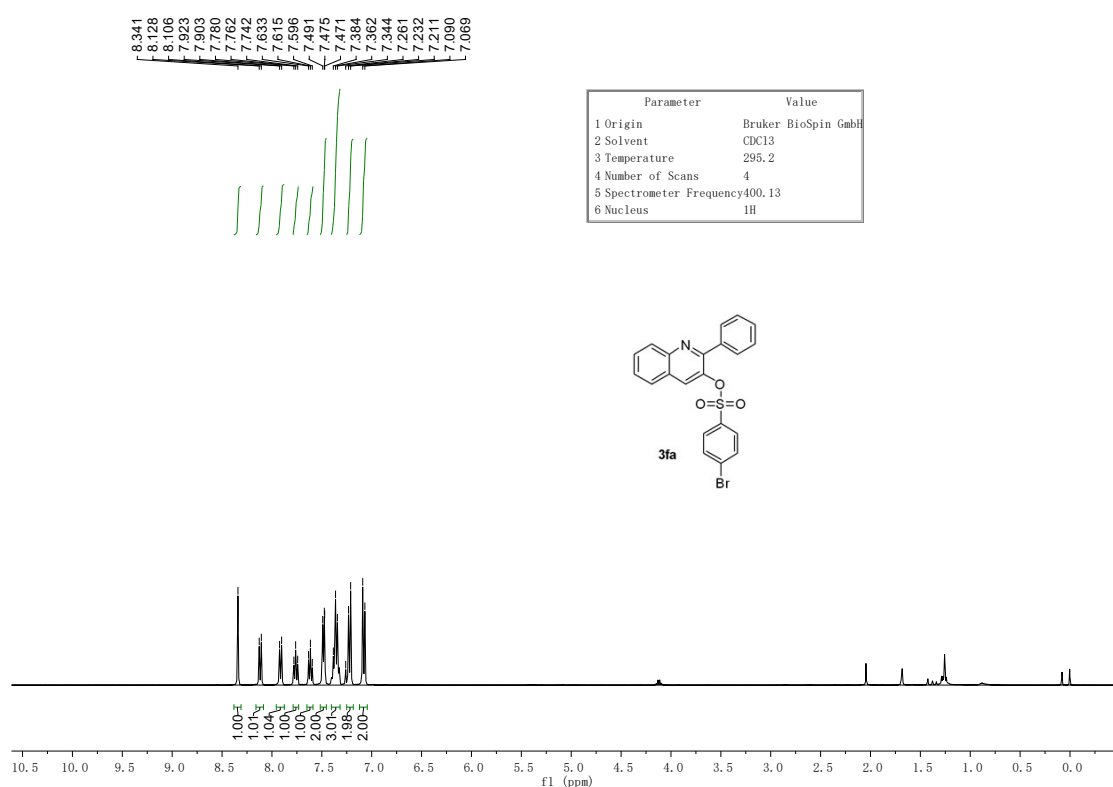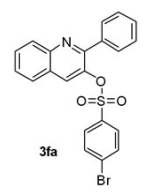

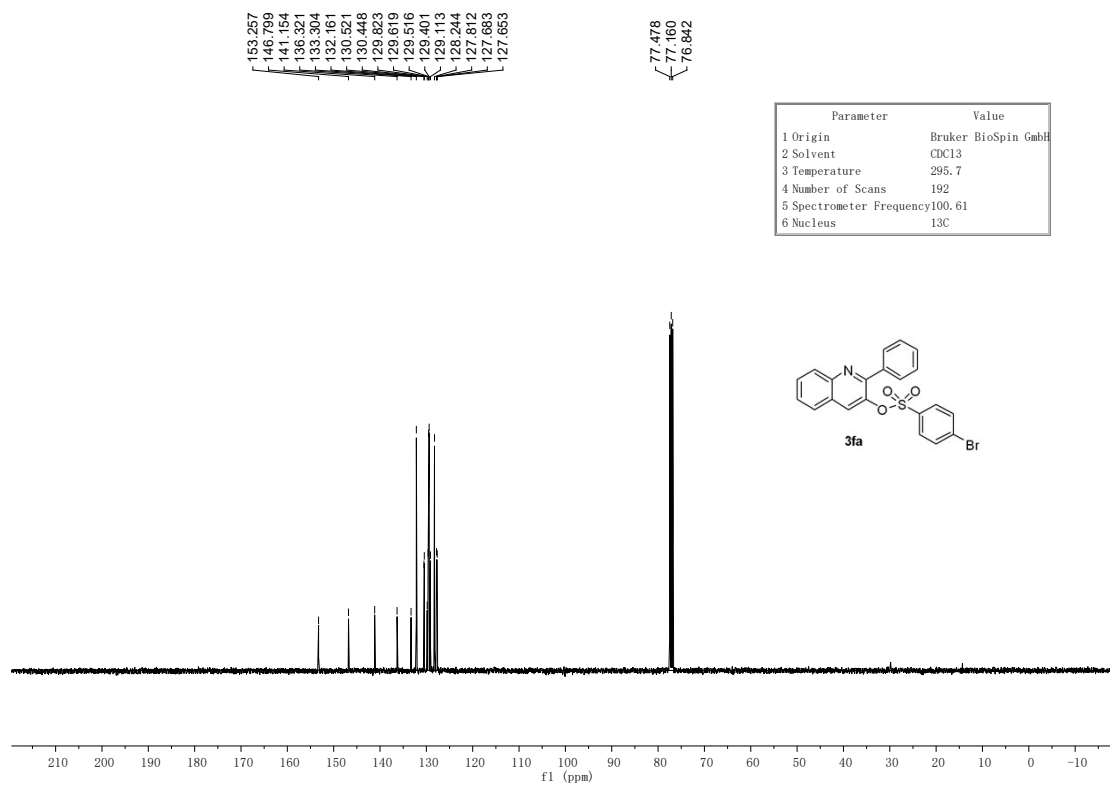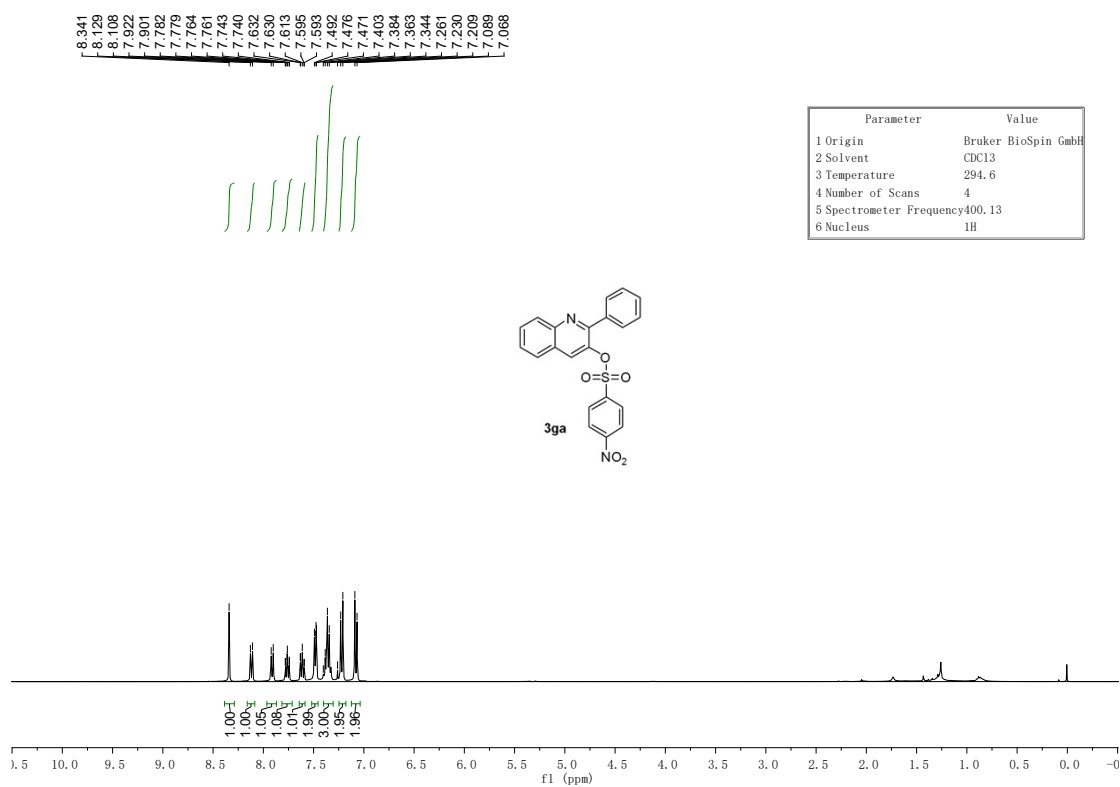

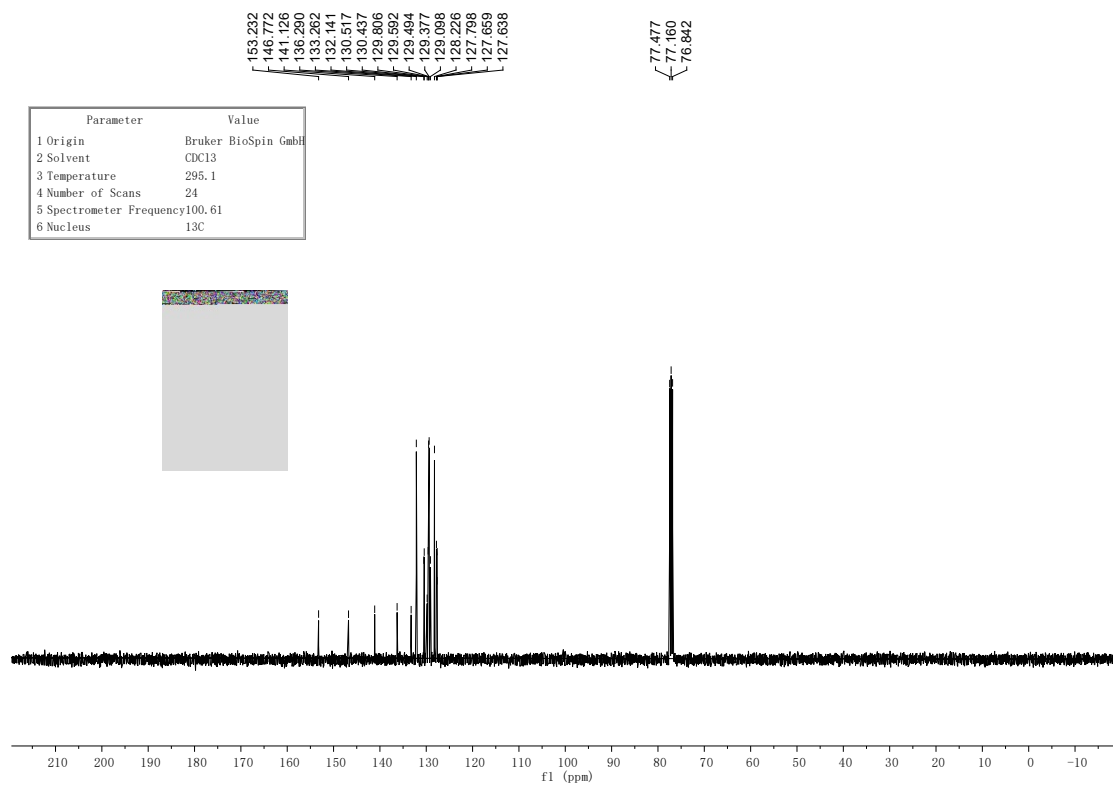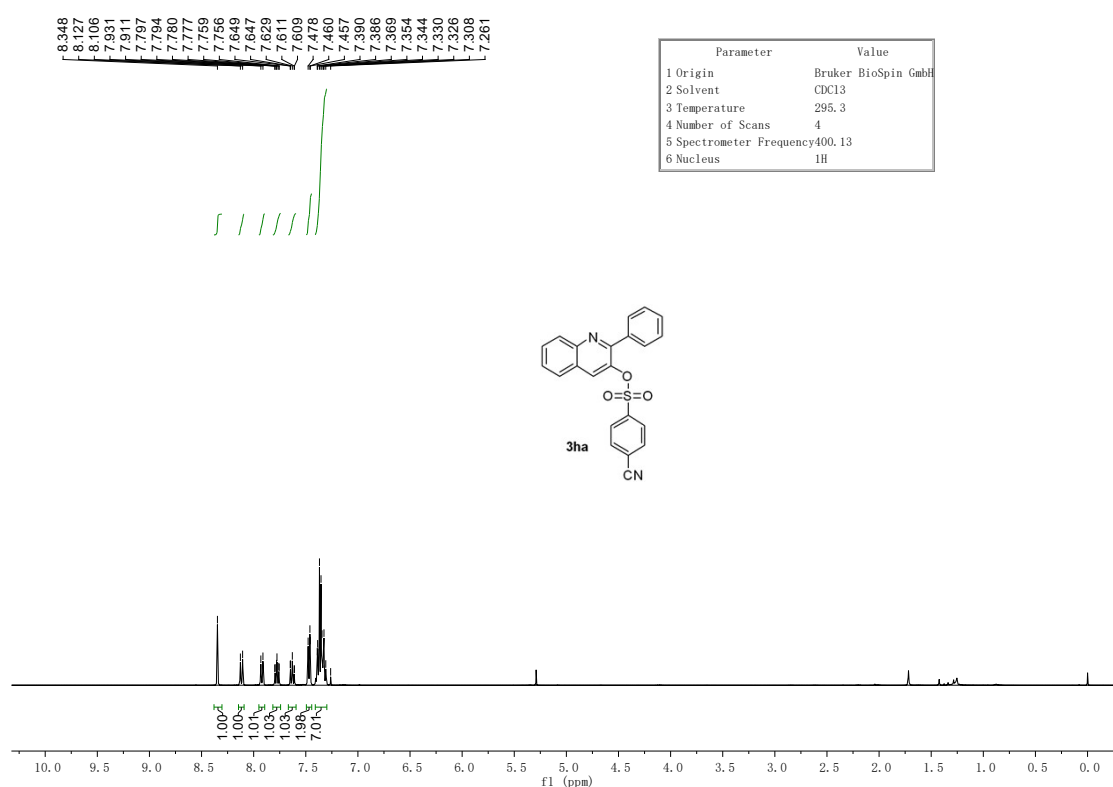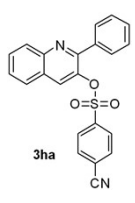

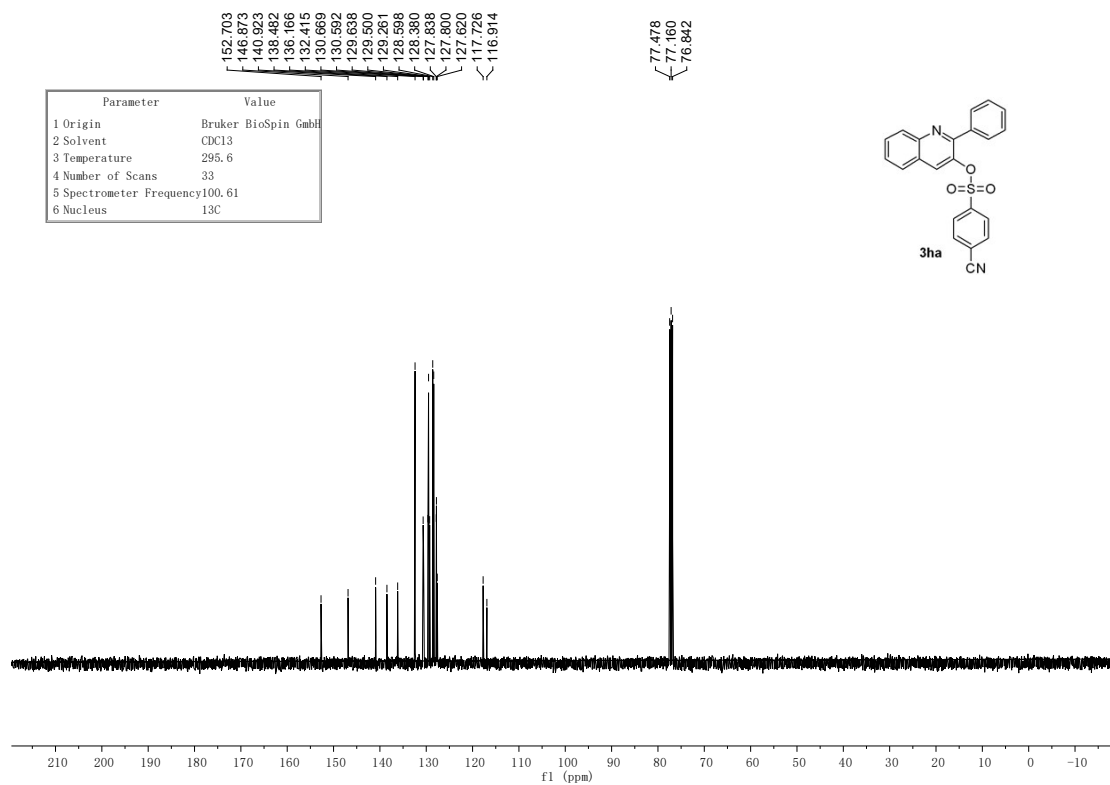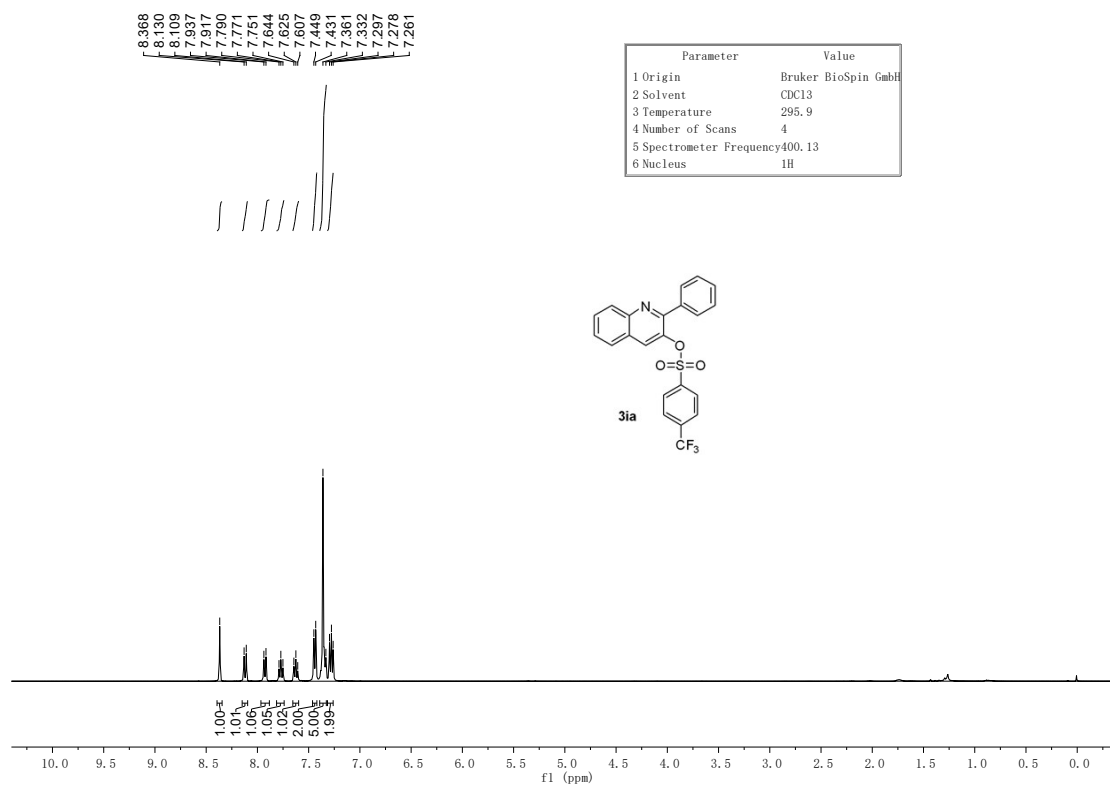



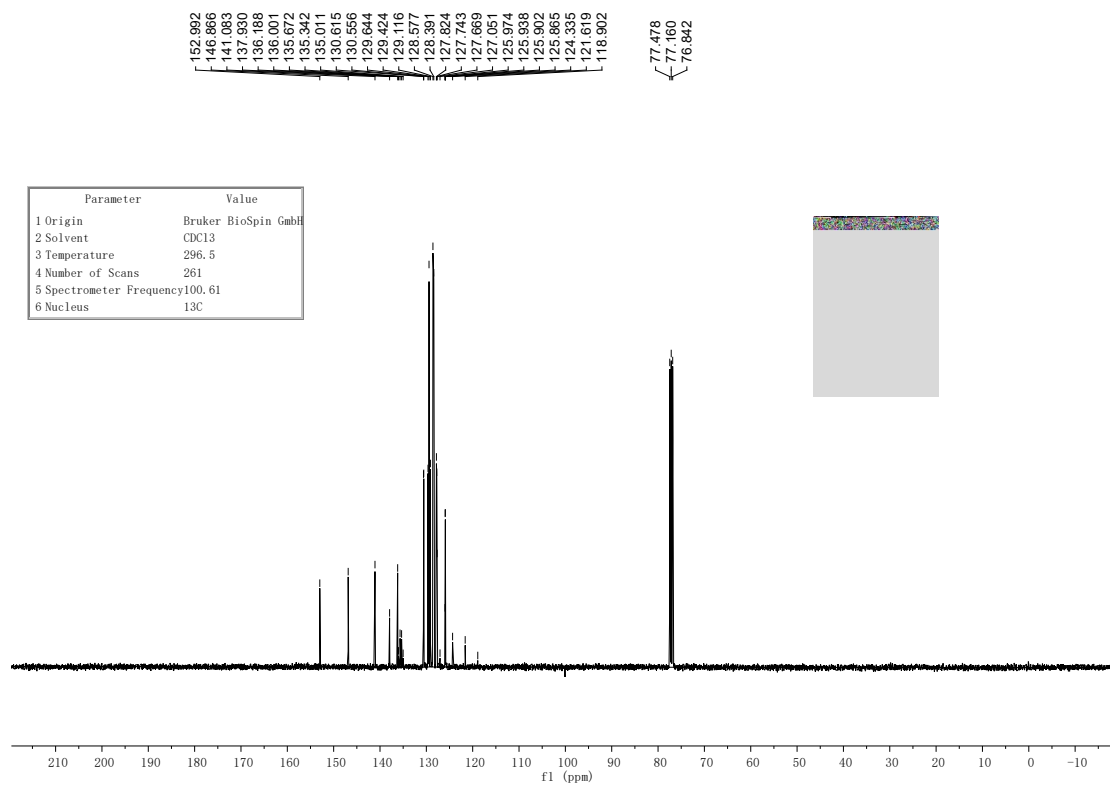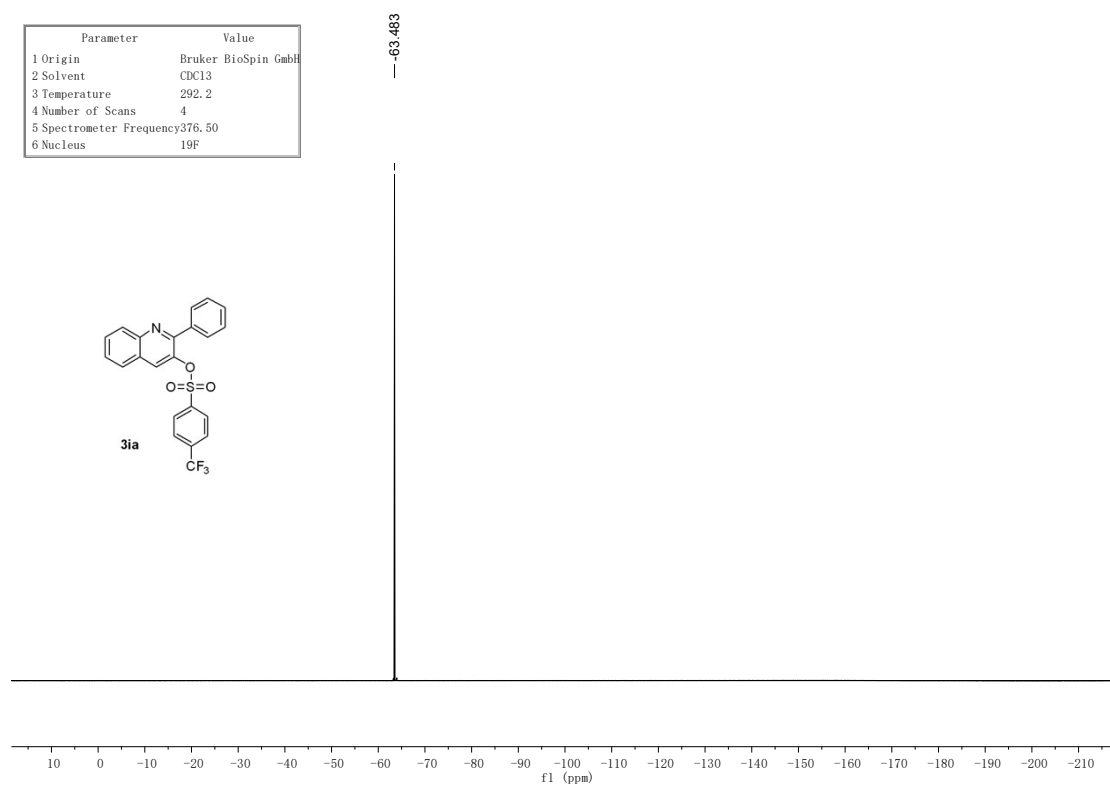

8.360  
8.134  
8.113  
7.926  
7.906  
7.782  
7.764  
7.743  
7.634  
7.616  
7.597  
7.514  
7.497  
7.366  
7.349  
7.334  
7.315  
7.304  
7.282  
7.261  
6.825  
6.804

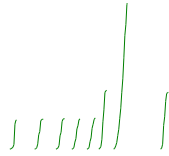

| Parameter                | Value               |
|--------------------------|---------------------|
| 1 Origin                 | Bruker BioSpin GmbH |
| 2 Solvent                | CDCl3               |
| 3 Temperature            | 296.0               |
| 4 Number of Scans        | 4                   |
| 5 Spectrometer Frequency | 400.13              |
| 6 Nucleus                | 1H                  |

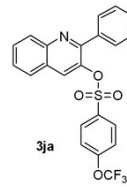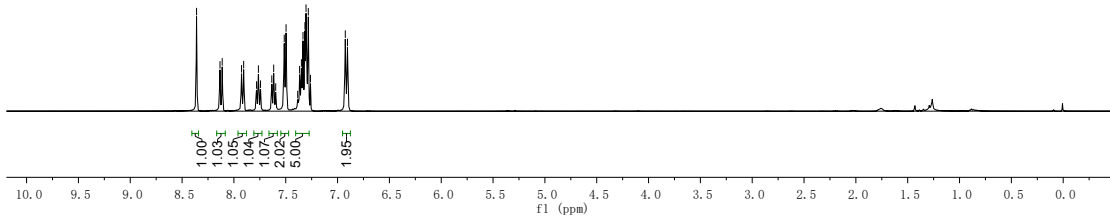

153.161  
146.818  
141.137  
136.302  
132.558  
130.478  
130.456  
130.359  
129.628  
129.472  
129.124  
128.288  
127.804  
127.671  
124.061  
121.475  
120.357  
118.889  
116.303

77.477  
77.160  
76.842

| Parameter                | Value               |
|--------------------------|---------------------|
| 1 Origin                 | Bruker BioSpin GmbH |
| 2 Solvent                | CDCl3               |
| 3 Temperature            | 296.2               |
| 4 Number of Scans        | 210                 |
| 5 Spectrometer Frequency | 100.61              |
| 6 Nucleus                | 13C                 |

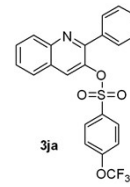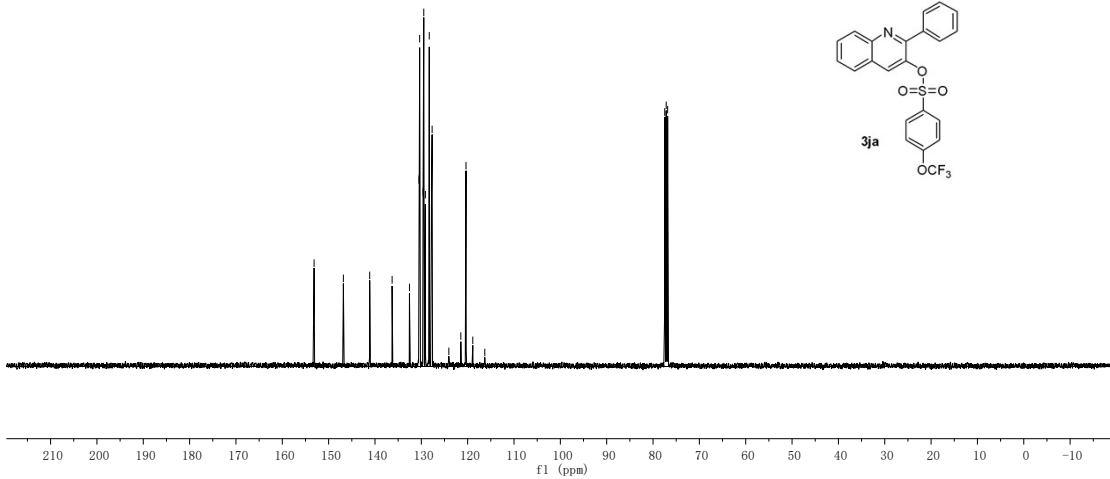

| Parameter                | Value               |
|--------------------------|---------------------|
| 1 Origin                 | Bruker BioSpin GmbH |
| 2 Solvent                | CDCl3               |
| 3 Temperature            | 292.3               |
| 4 Number of Scans        | 4                   |
| 5 Spectrometer Frequency | 376.50              |
| 6 Nucleus                | 19F                 |

-57.514

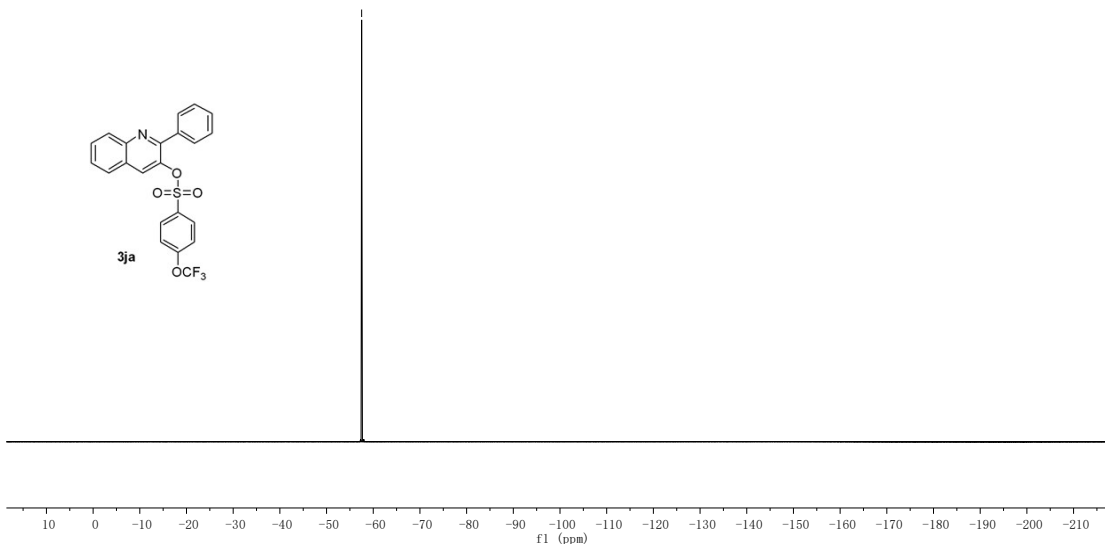

8.321  
8.221  
8.126  
8.105  
7.900  
7.879  
7.853  
7.833  
7.749  
7.746  
7.732  
7.729  
7.711  
7.597  
7.594  
7.577  
7.551  
7.548  
7.532  
7.482  
7.463  
7.377  
7.359  
7.342  
7.334  
7.315  
7.261  
7.195  
7.174  
7.085  
7.067  
6.932  
6.912

2.332  
2.304

| Parameter                | Value               |
|--------------------------|---------------------|
| 1 Origin                 | Bruker BioSpin GmbH |
| 2 Solvent                | CDCl3               |
| 3 Temperature            | 305.2               |
| 4 Number of Scans        | 4                   |
| 5 Spectrometer Frequency | 400.13              |
| 6 Nucleus                | 1H                  |

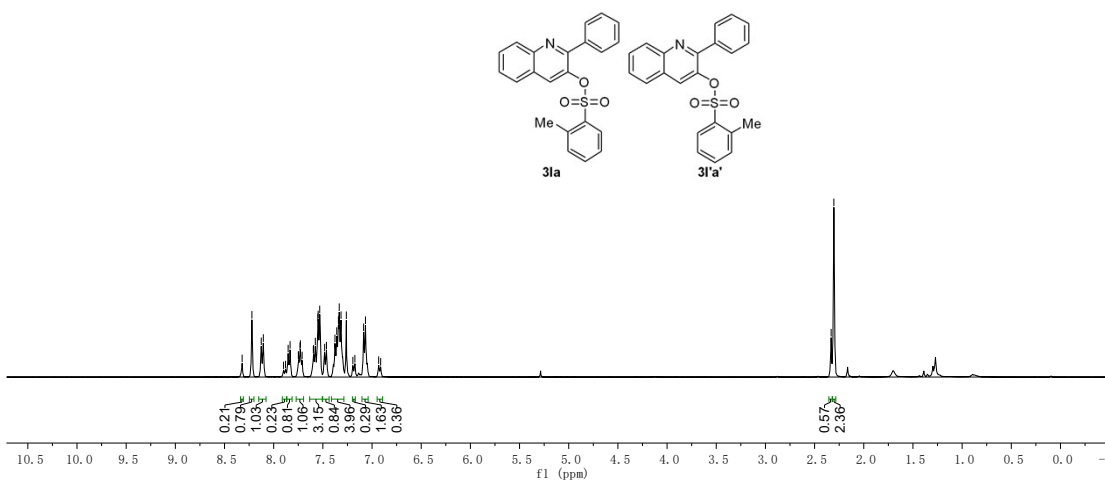

0.21  
0.70  
1.03  
0.23  
0.81  
1.06  
3.15  
0.84  
3.96  
0.29  
1.63  
0.36

0.57  
2.36

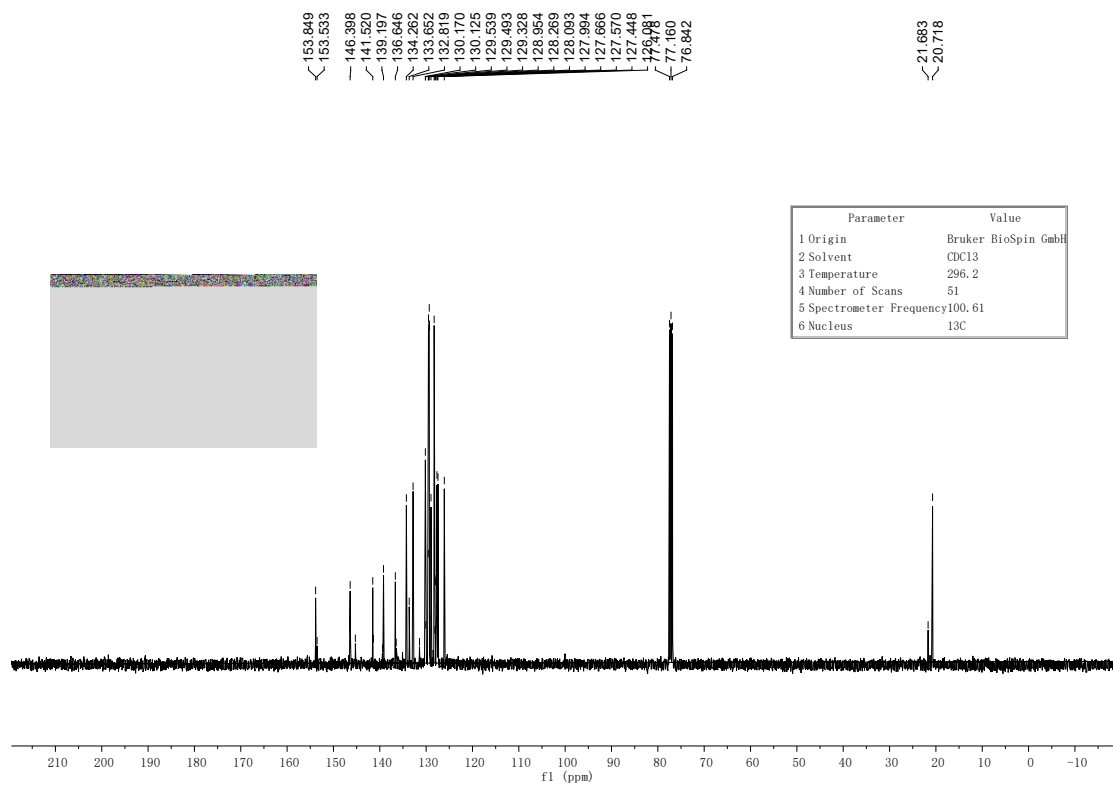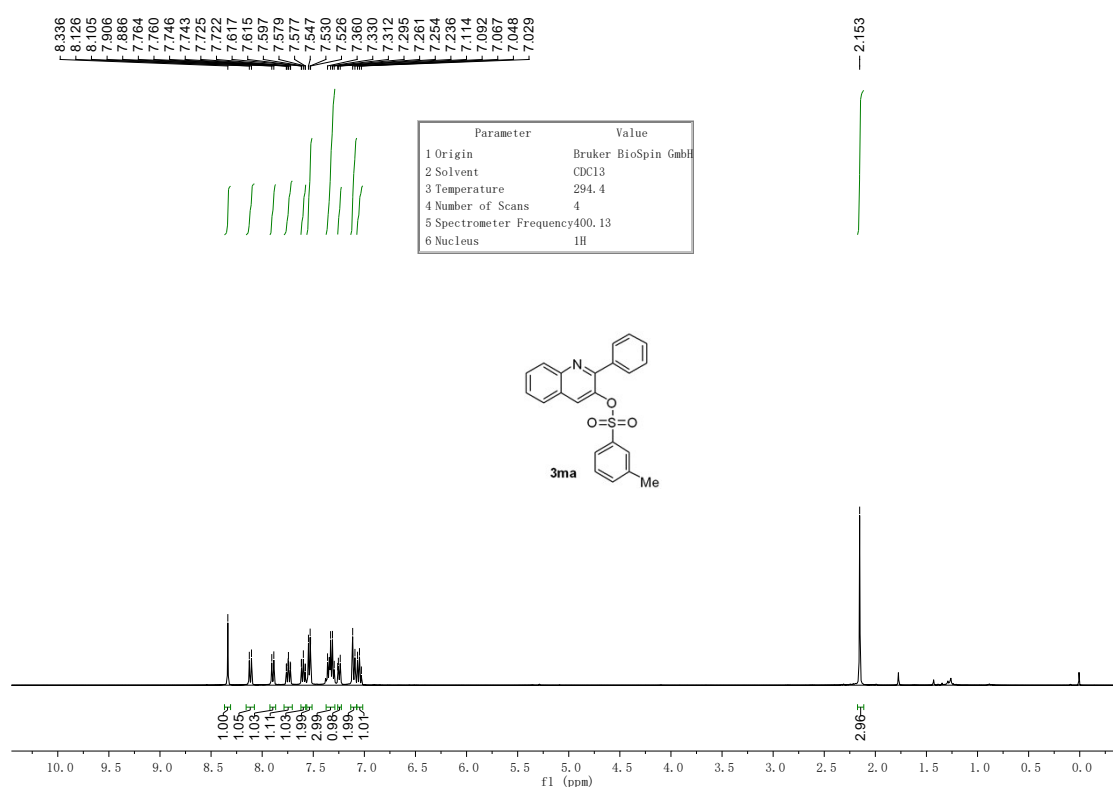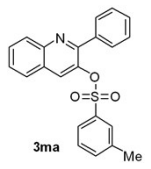

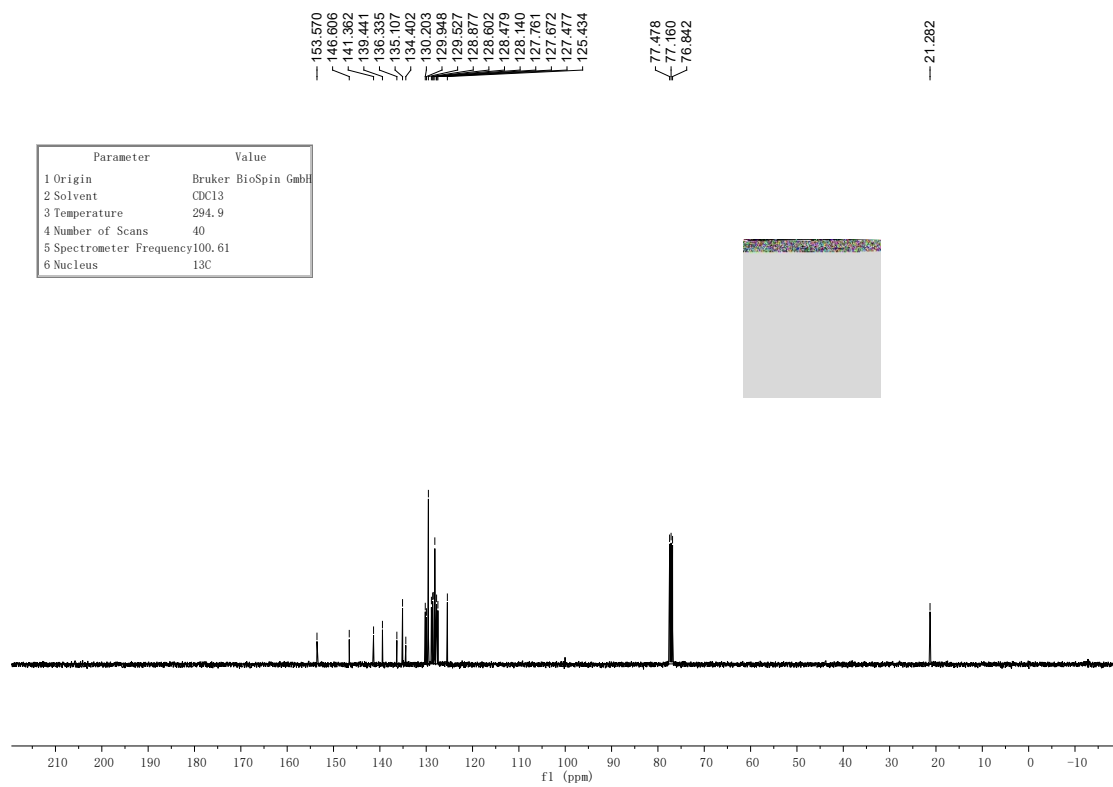

| Parameter                | Value               |
|--------------------------|---------------------|
| 1 Origin                 | Bruker BioSpin GmbH |
| 2 Solvent                | CDCl3               |
| 3 Temperature            | 294.9               |
| 4 Number of Scans        | 40                  |
| 5 Spectrometer Frequency | 100.61              |
| 6 Nucleus                | 13C                 |

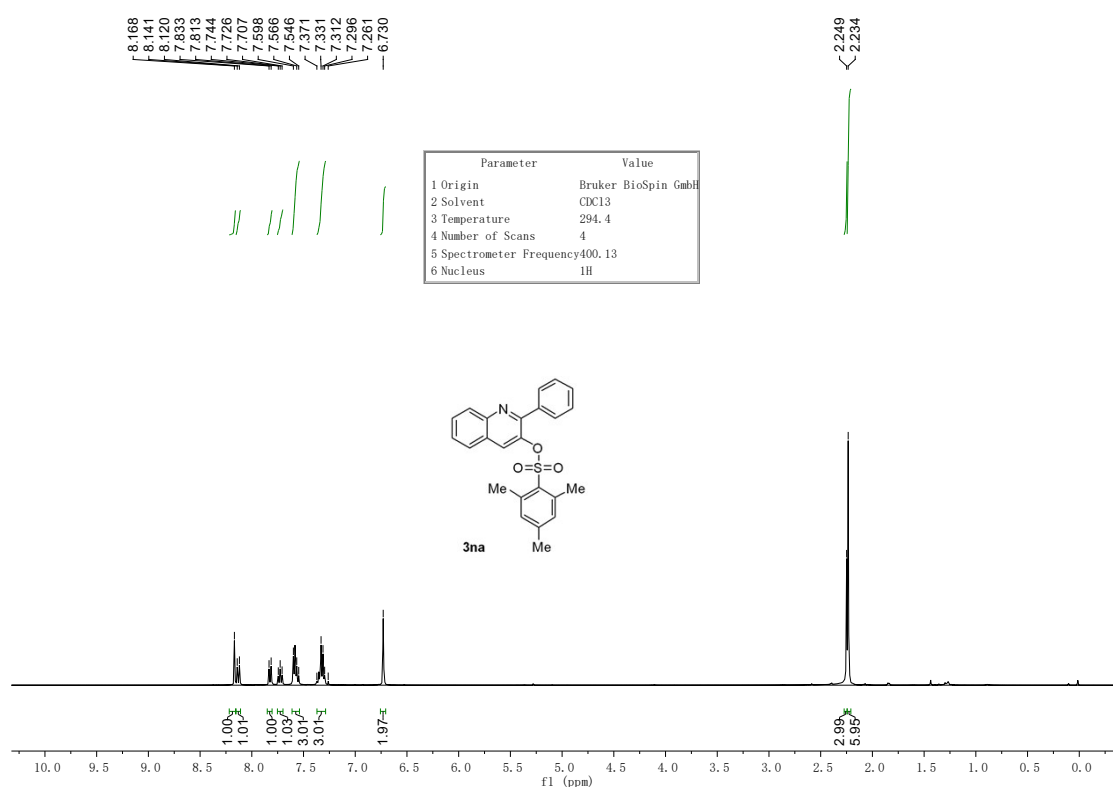

| Parameter                | Value               |
|--------------------------|---------------------|
| 1 Origin                 | Bruker BioSpin GmbH |
| 2 Solvent                | CDCl3               |
| 3 Temperature            | 294.4               |
| 4 Number of Scans        | 4                   |
| 5 Spectrometer Frequency | 400.13              |
| 6 Nucleus                | 1H                  |

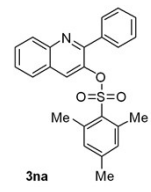

Integration values for the 1H NMR spectrum: 1.00±, 1.01±, 1.00±, 1.09±, 3.01±, 3.01±, 1.97±, 2.99±, 5.95±.

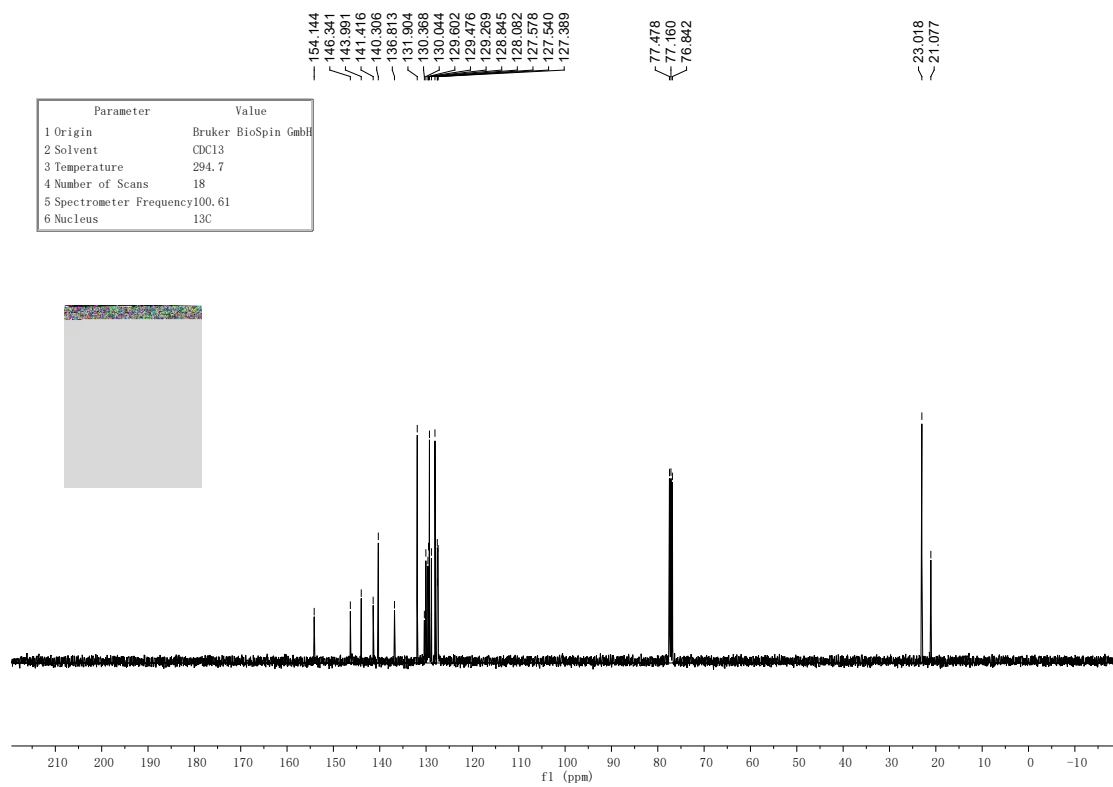

| Parameter                | Value               |
|--------------------------|---------------------|
| 1 Origin                 | Bruker BioSpin GmbH |
| 2 Solvent                | CDCl3               |
| 3 Temperature            | 294.7               |
| 4 Number of Scans        | 18                  |
| 5 Spectrometer Frequency | 100.61              |
| 6 Nucleus                | 13C                 |

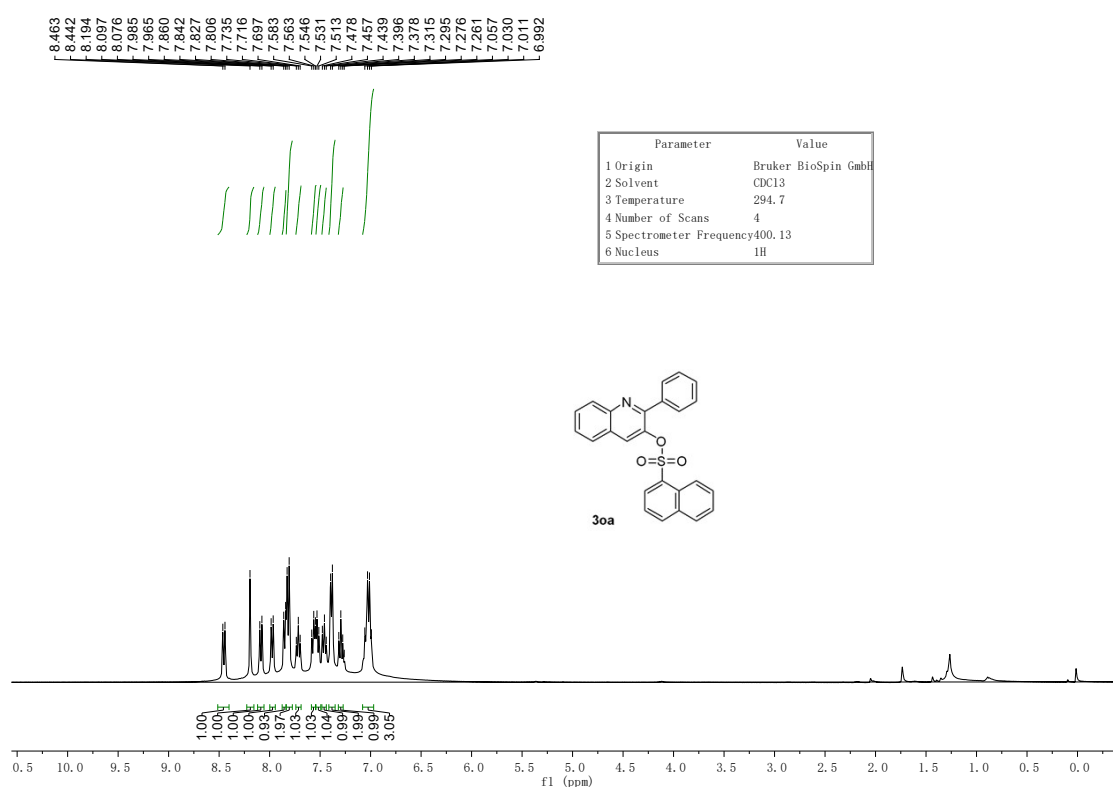

| Parameter                | Value               |
|--------------------------|---------------------|
| 1 Origin                 | Bruker BioSpin GmbH |
| 2 Solvent                | CDCl3               |
| 3 Temperature            | 294.7               |
| 4 Number of Scans        | 4                   |
| 5 Spectrometer Frequency | 400.13              |
| 6 Nucleus                | 1H                  |

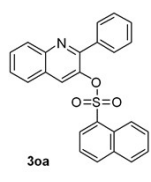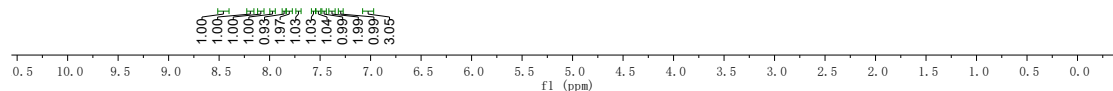

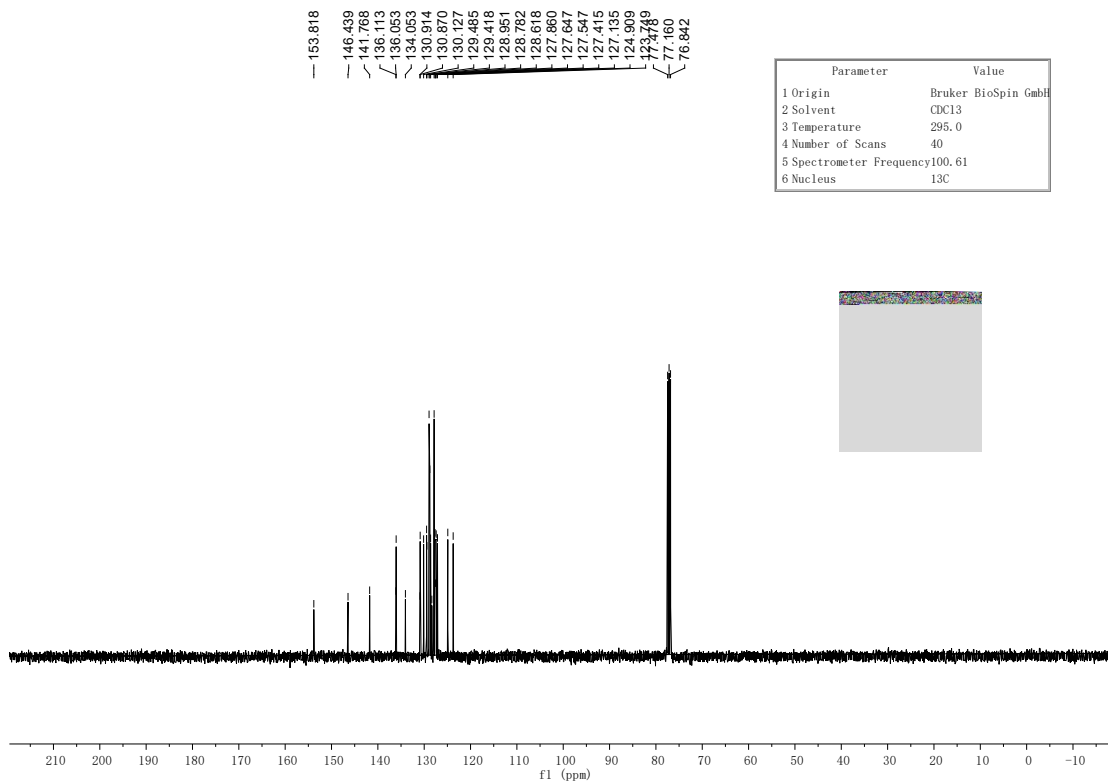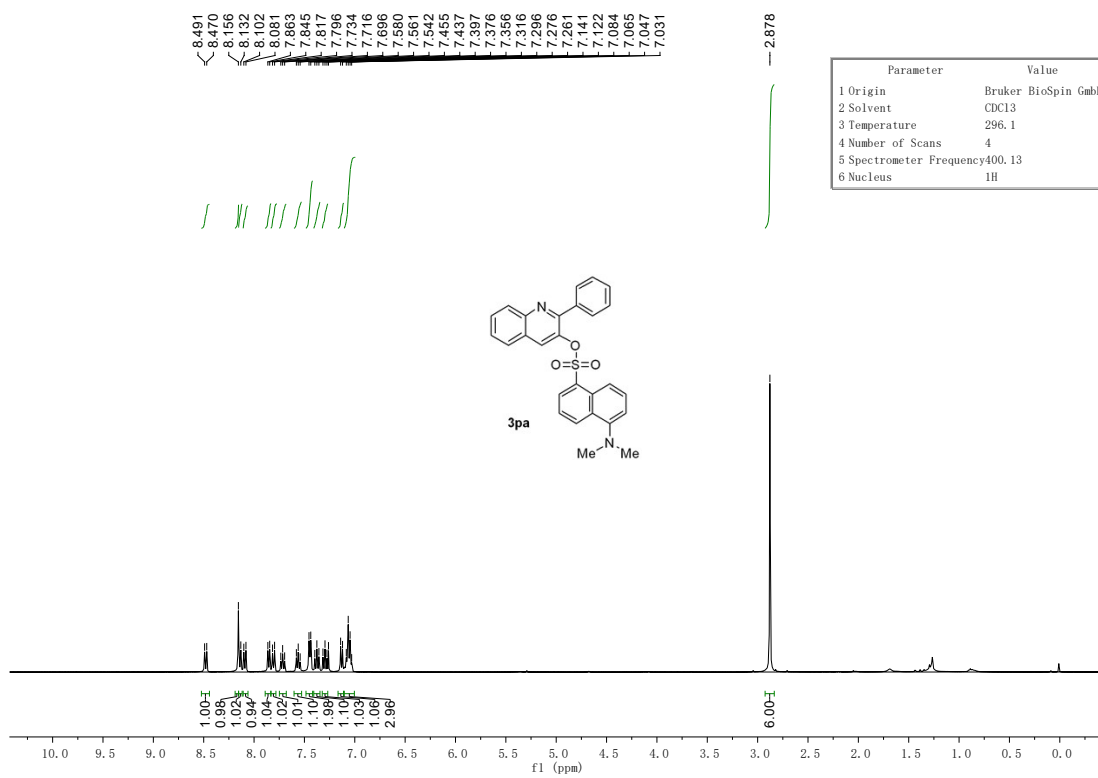

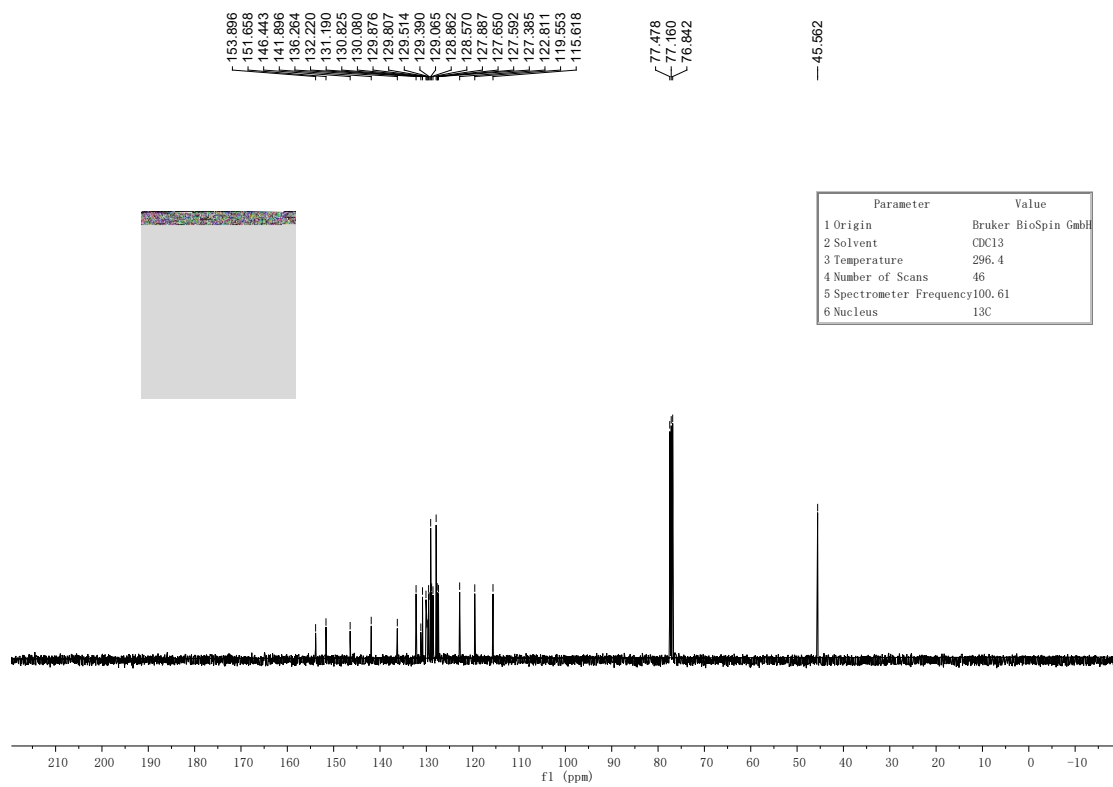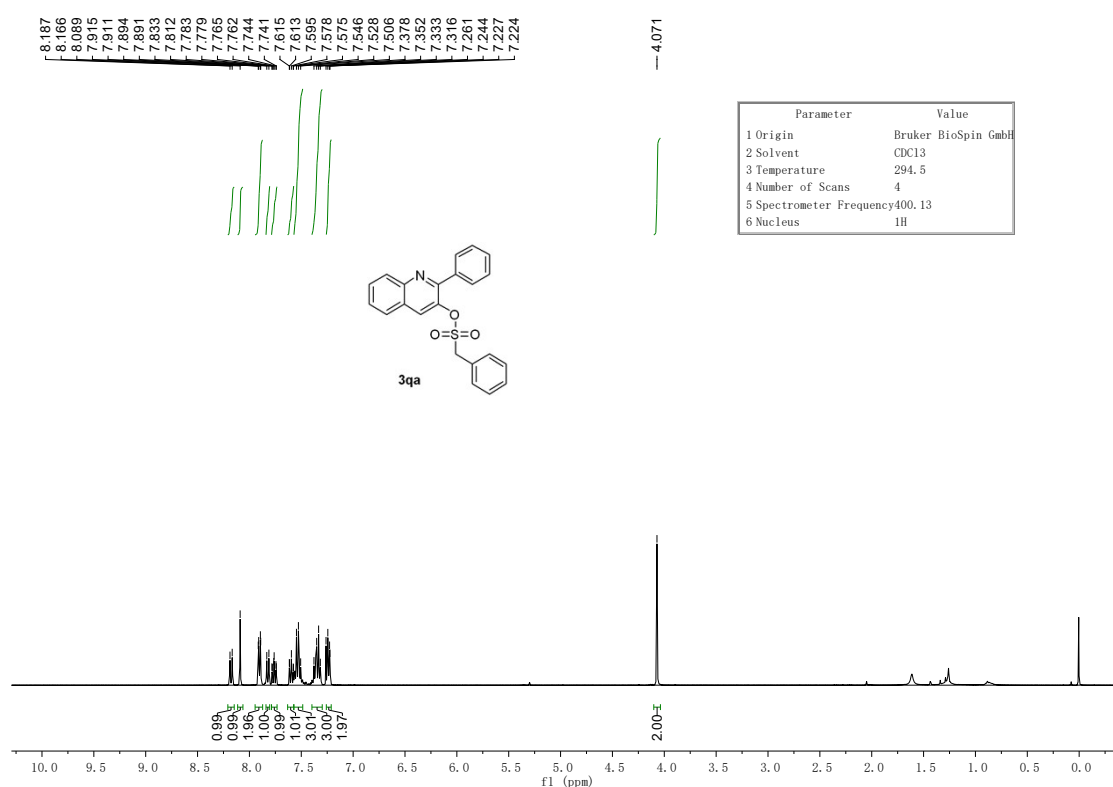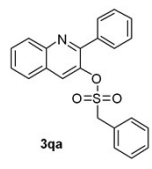



| Parameter                | Value               |
|--------------------------|---------------------|
| 1 Origin                 | Bruker BioSpin GmbH |
| 2 Solvent                | CDCl3               |
| 3 Temperature            | 294.6               |
| 4 Number of Scans        | 100                 |
| 5 Spectrometer Frequency | 100.61              |
| 6 Nucleus                | <sup>13</sup> C     |

153.363  
146.585  
141.420  
136.895  
130.927  
130.270  
129.797  
129.621  
129.598  
129.480  
129.117  
129.050  
128.740  
127.810  
127.716  
127.666  
126.586

77.477  
77.160  
76.842

57.795

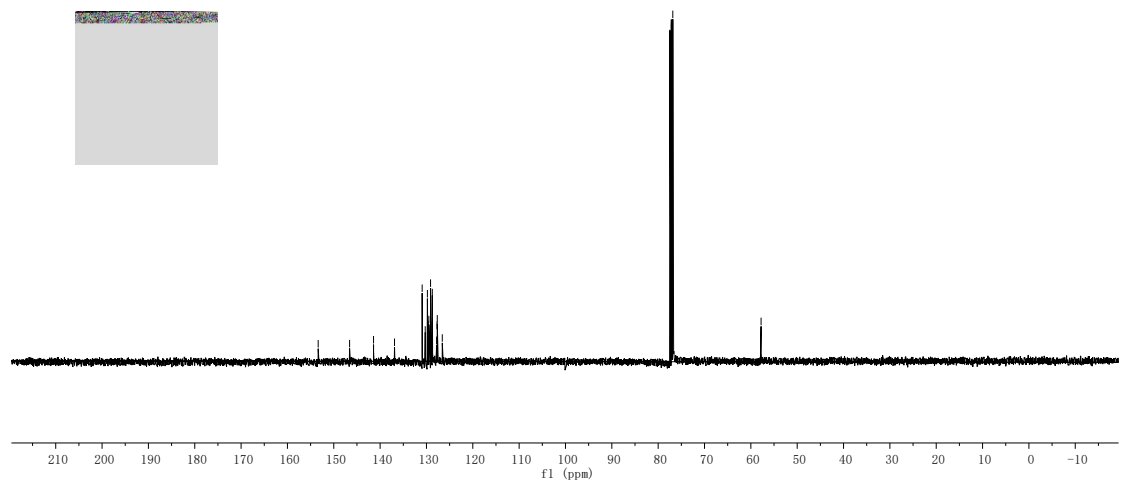

V

8.297  
8.186  
8.164  
7.891  
7.871  
7.781  
7.761  
7.743  
7.623  
7.566  
7.549  
7.532  
7.514  
7.489  
7.261

| Parameter                | Value               |
|--------------------------|---------------------|
| 1 Origin                 | Bruker BioSpin GmbH |
| 2 Solvent                | CDCl3               |
| 3 Temperature            | 296.1               |
| 4 Number of Scans        | 4                   |
| 5 Spectrometer Frequency | 400.13              |
| 6 Nucleus                | <sup>1</sup> H      |

2.804  
2.886  
2.807  
2.849

1.178  
1.159  
1.141

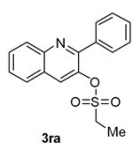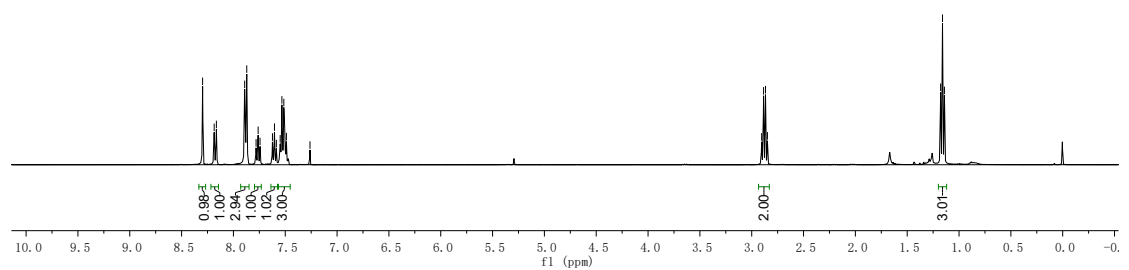

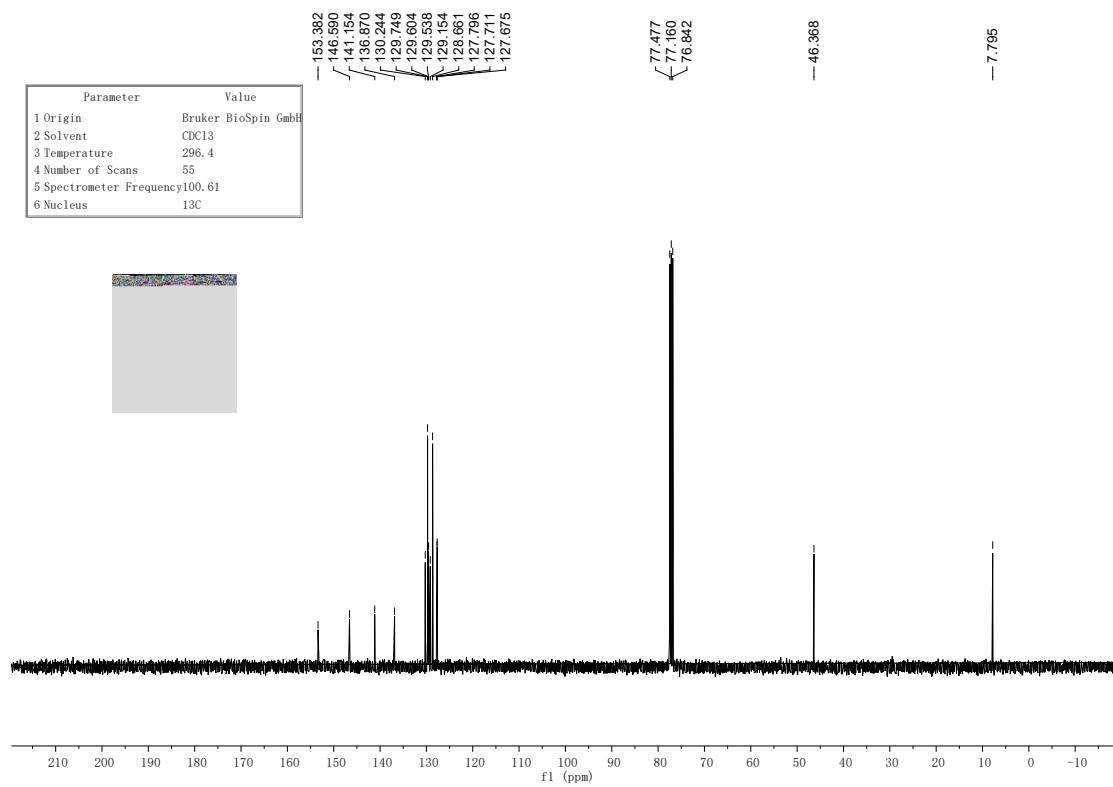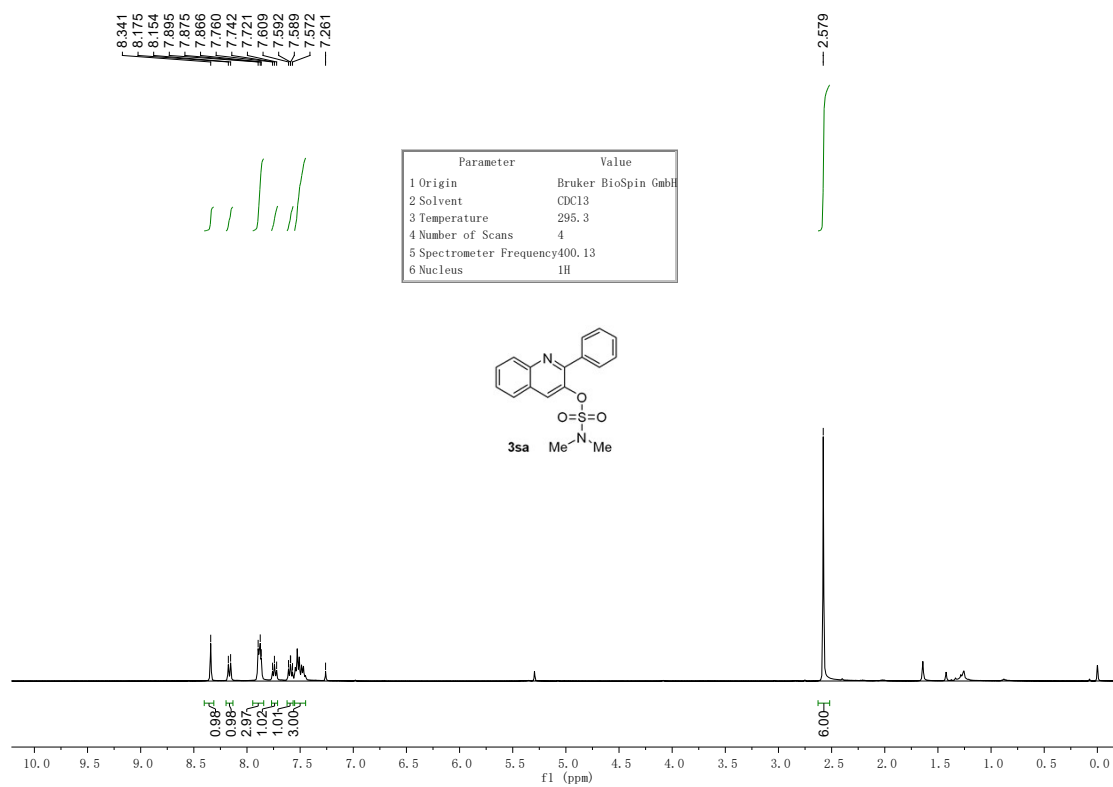

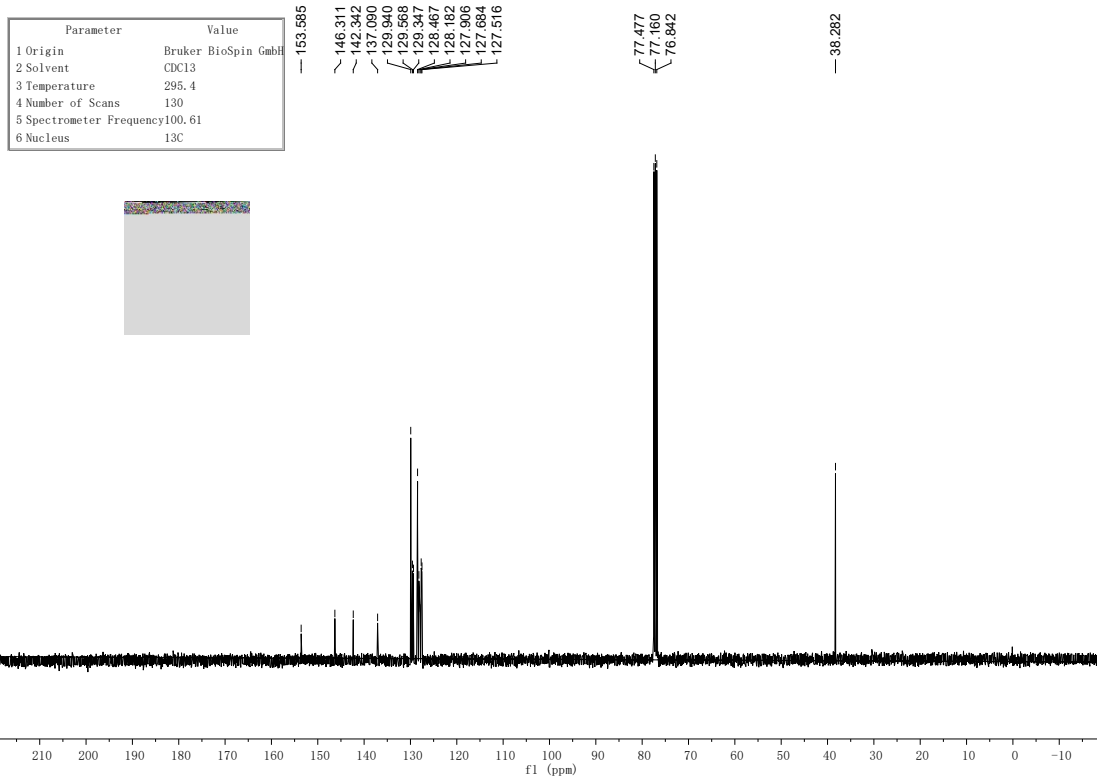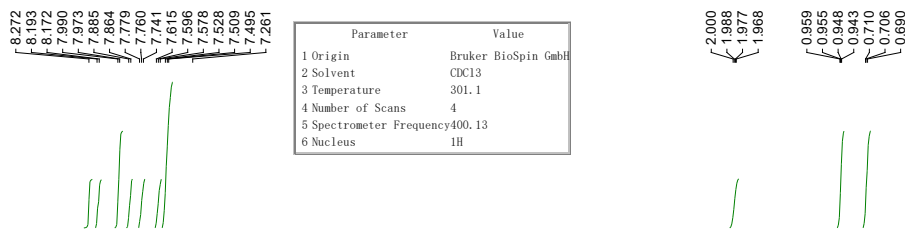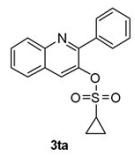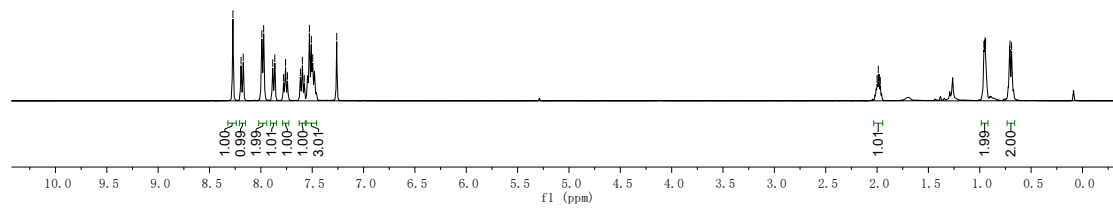

| Parameter                | Value               |
|--------------------------|---------------------|
| 1 Origin                 | Bruker BioSpin GmbH |
| 2 Solvent                | CDCl3               |
| 3 Temperature            | 301.4               |
| 4 Number of Scans        | 40                  |
| 5 Spectrometer Frequency | 100.61              |
| 6 Nucleus                | 13C                 |

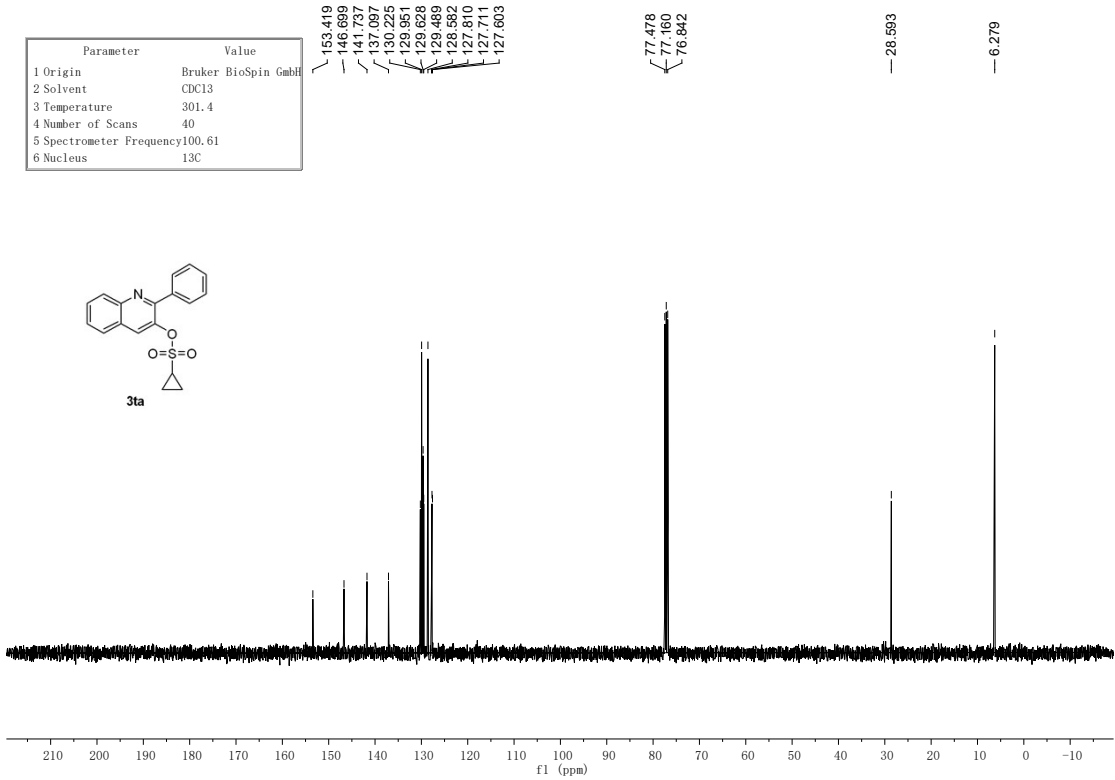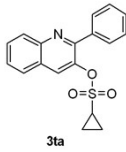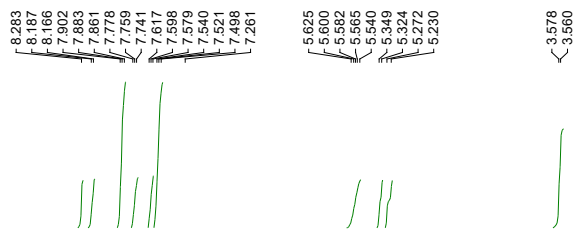

| Parameter                | Value               |
|--------------------------|---------------------|
| 1 Origin                 | Bruker BioSpin GmbH |
| 2 Solvent                | CDCl3               |
| 3 Temperature            | 296.6               |
| 4 Number of Scans        | 4                   |
| 5 Spectrometer Frequency | 400.13              |
| 6 Nucleus                | 1H                  |

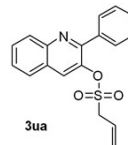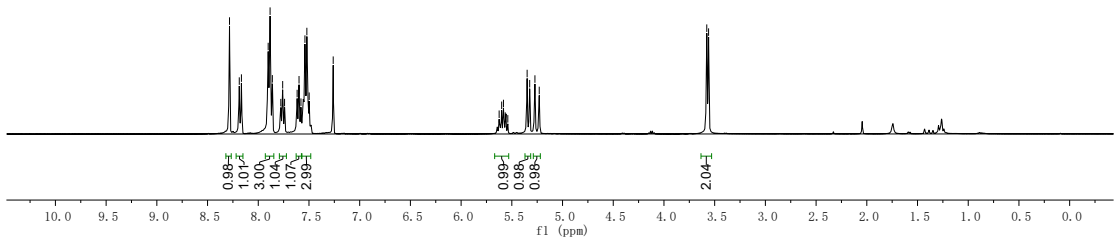

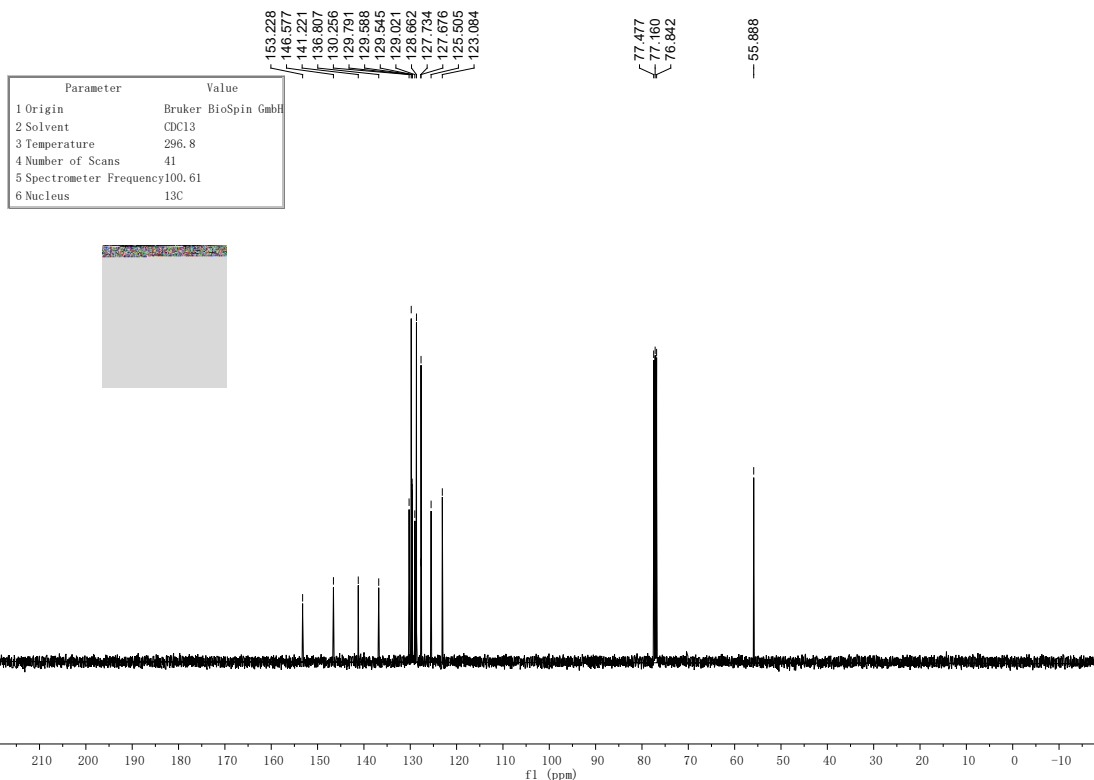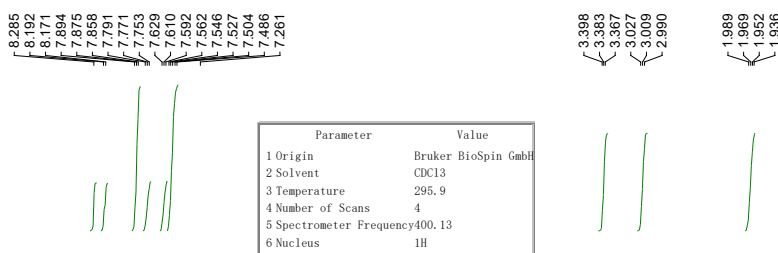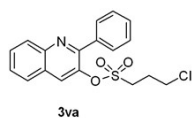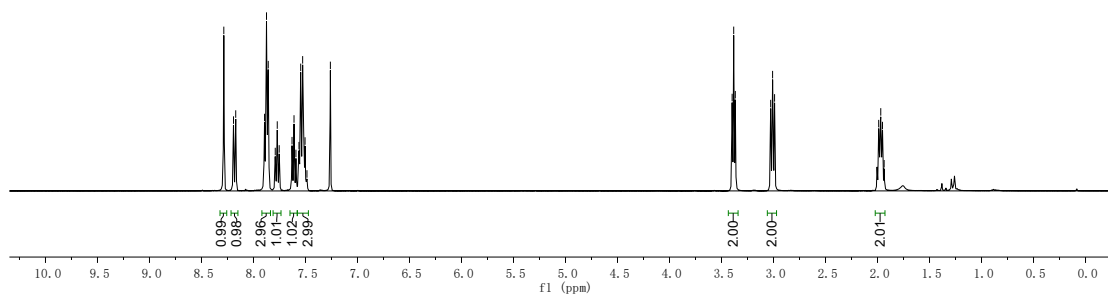

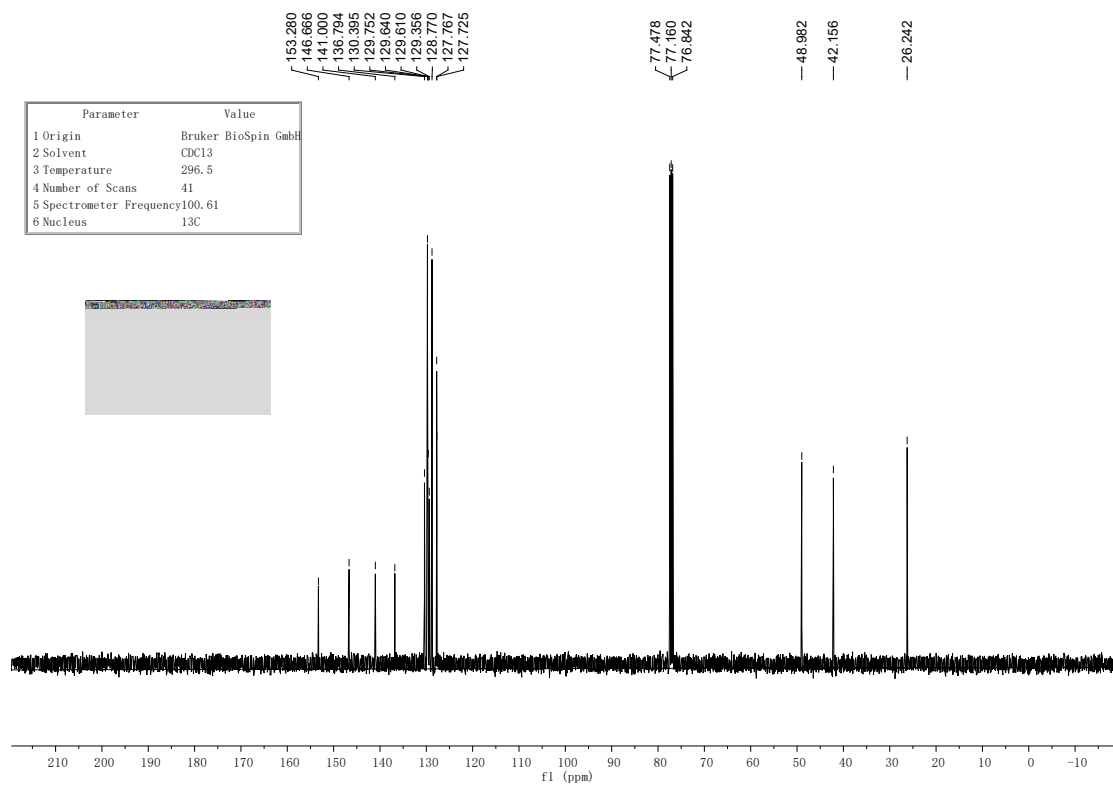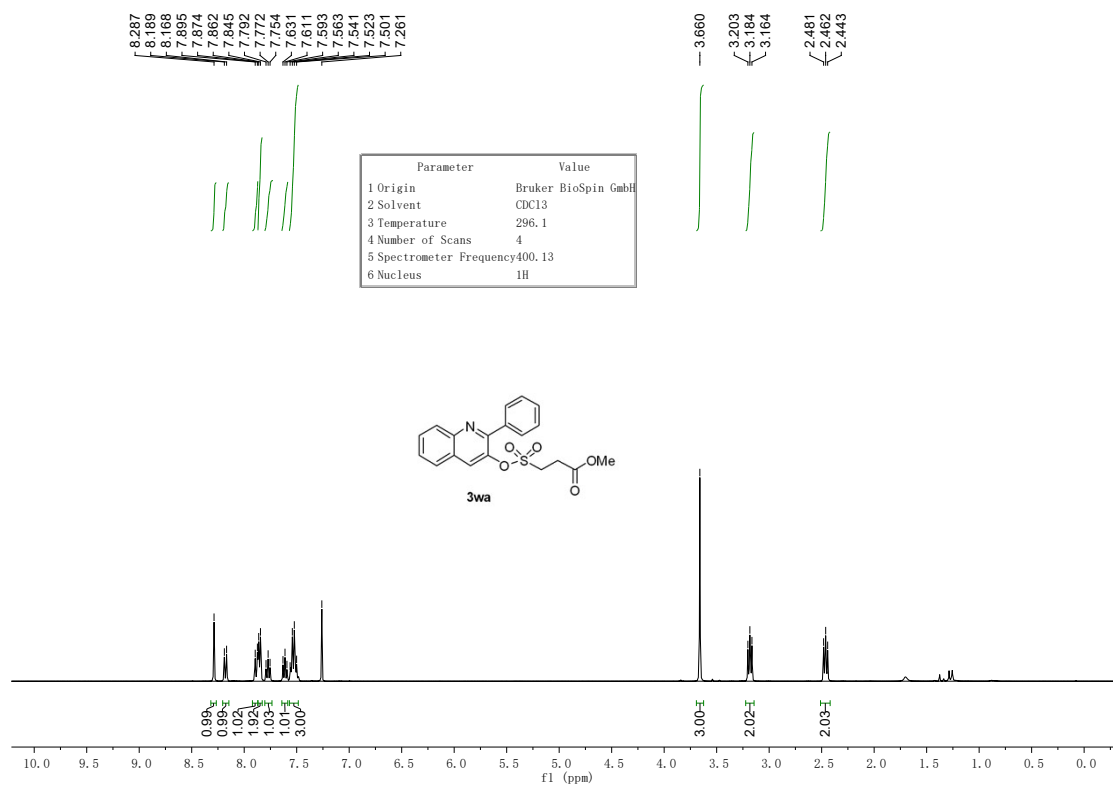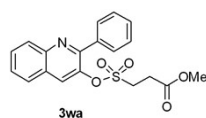

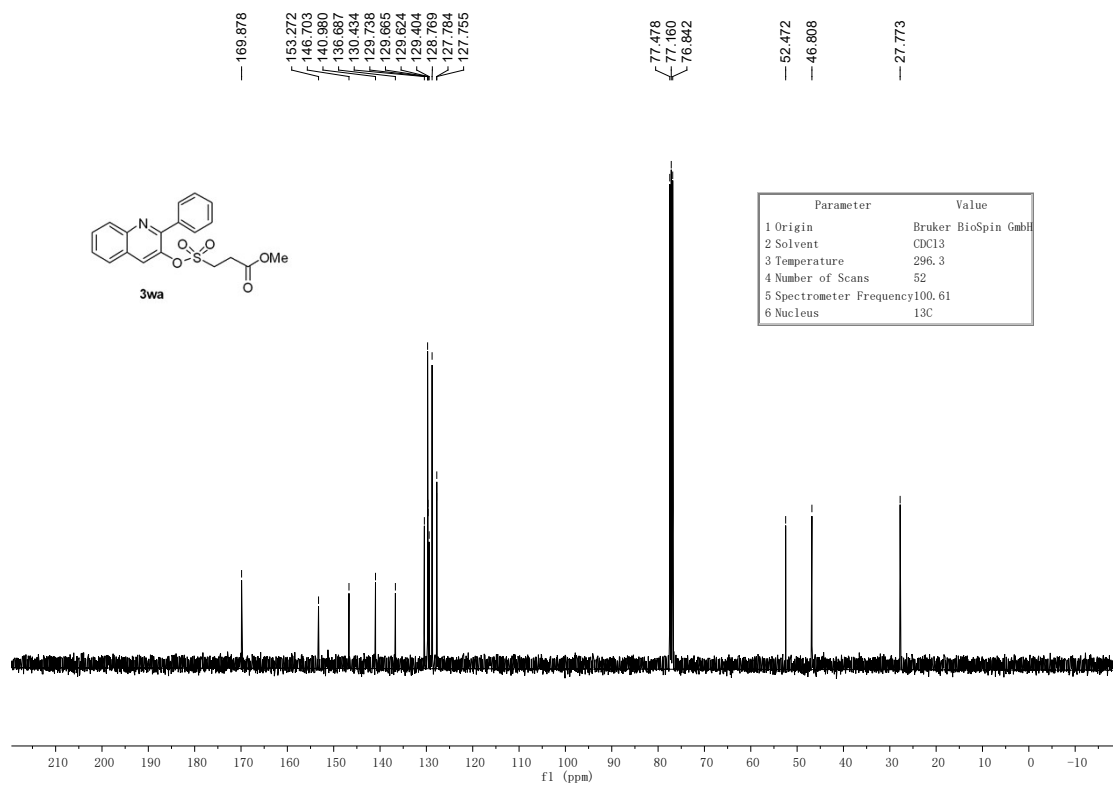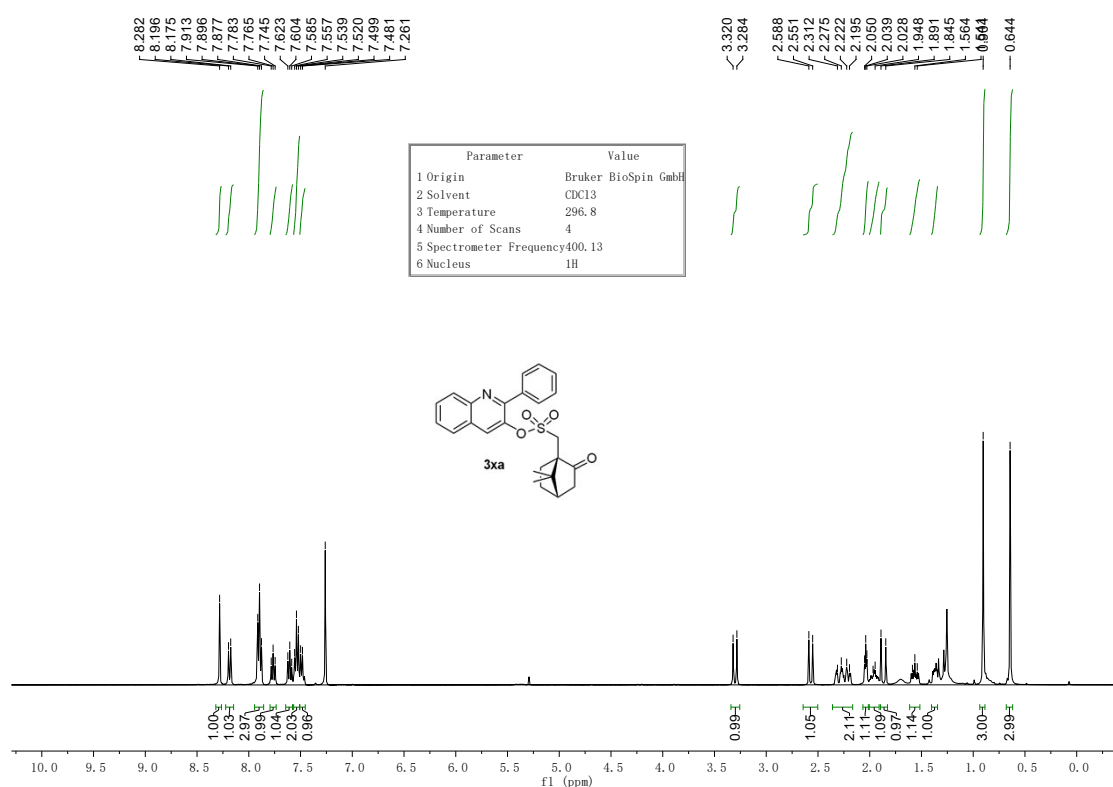

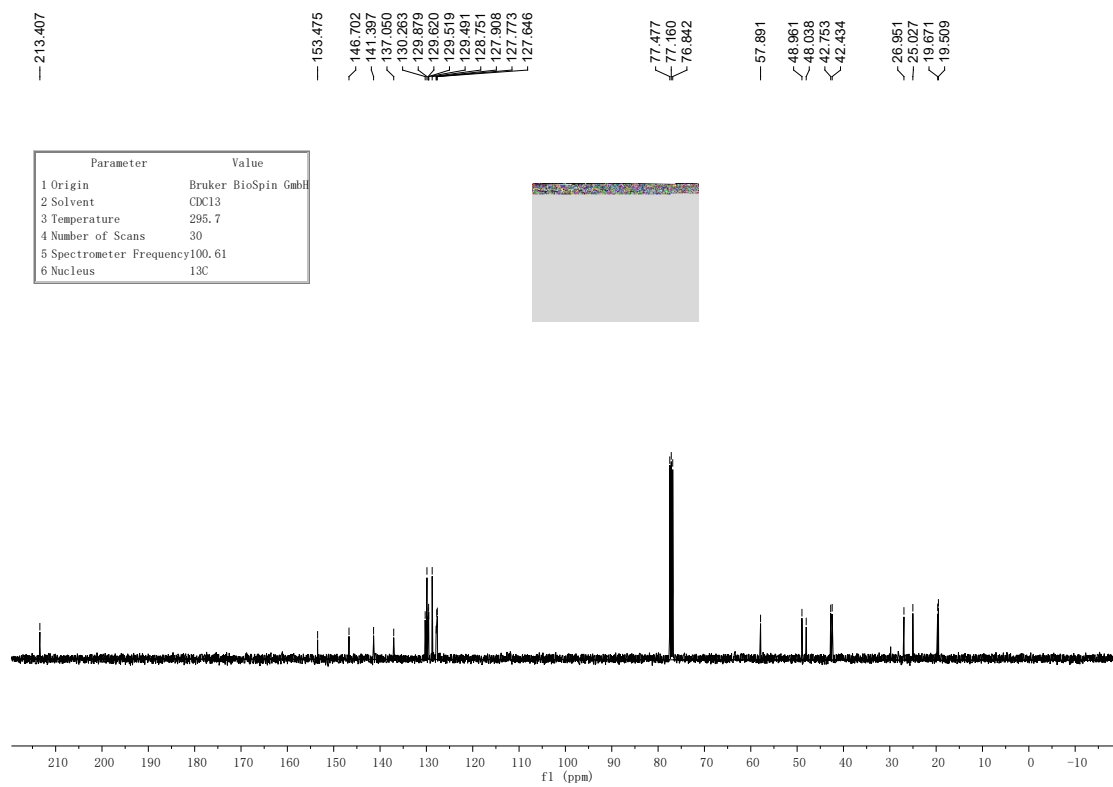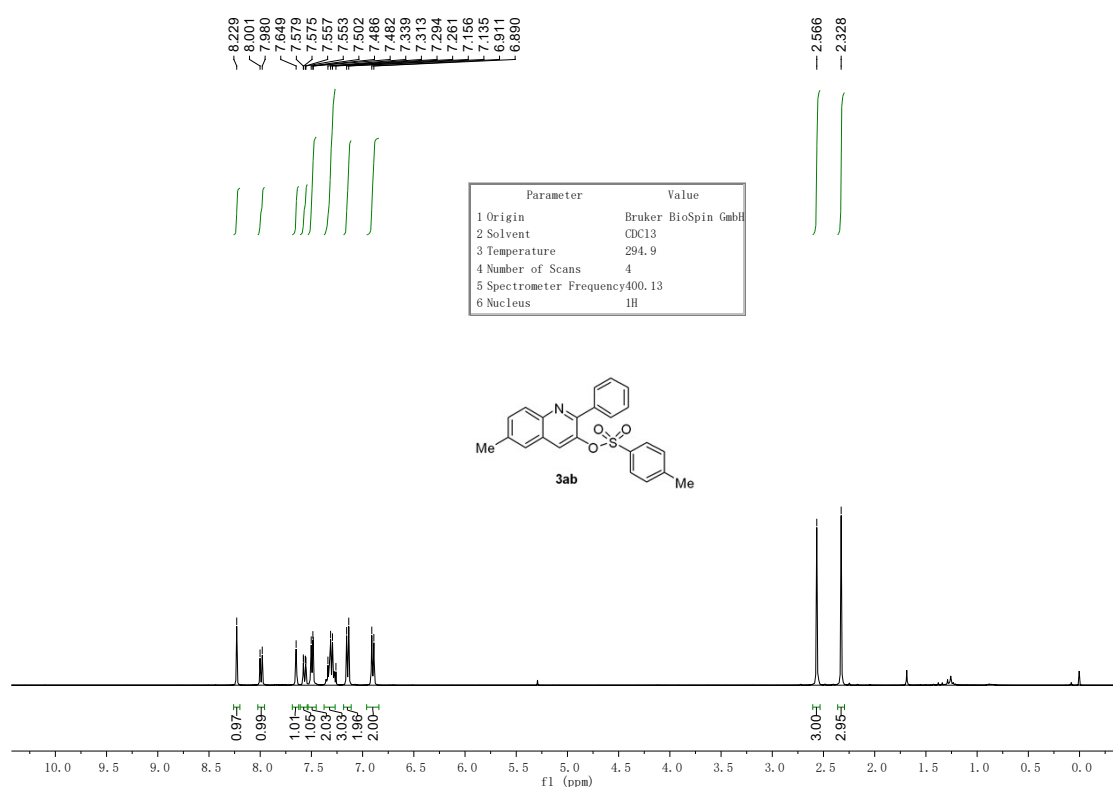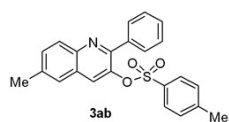



| Parameter                | Value               |
|--------------------------|---------------------|
| 1 Origin                 | Bruker BioSpin GmbH |
| 2 Solvent                | CDCl3               |
| 3 Temperature            | 295.3               |
| 4 Number of Scans        | 73                  |
| 5 Spectrometer Frequency | 100.61              |
| 6 Nucleus                | <sup>13</sup> C     |

152.573  
145.288  
145.231  
141.506  
137.593  
136.568  
131.482  
129.528  
129.480  
129.459  
129.206  
128.767  
128.131  
127.894  
127.796  
126.531

77.478  
77.160  
76.842

21.756  
21.726

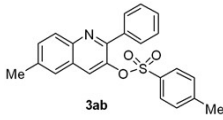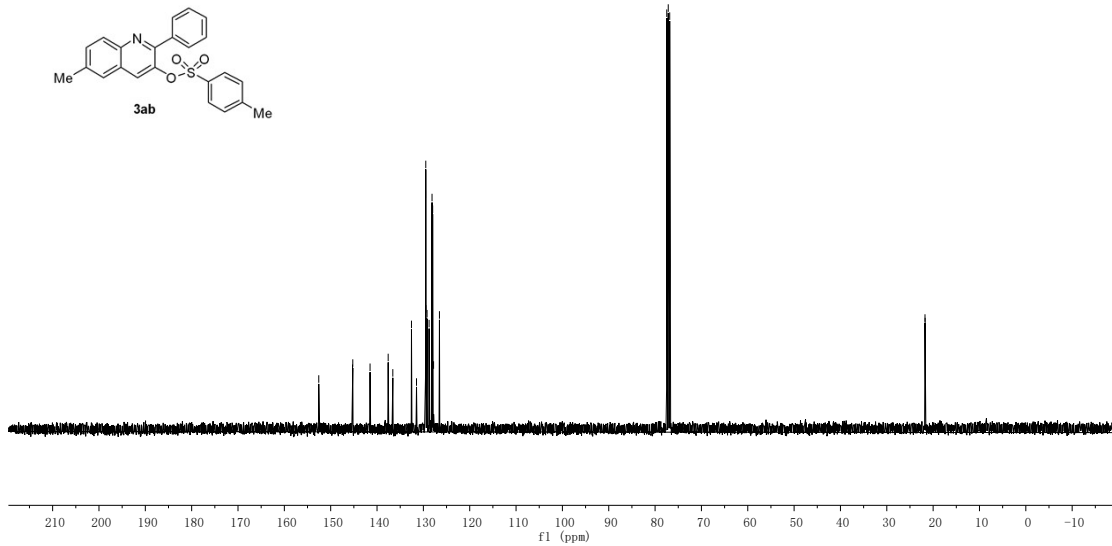

8.234  
7.992  
7.969  
7.474  
7.458  
7.453  
7.396  
7.389  
7.372  
7.366  
7.325  
7.301  
7.283  
7.261  
7.155  
7.143  
7.135  
6.911  
6.891

3.972

2.331

| Parameter                | Value               |
|--------------------------|---------------------|
| 1 Origin                 | Bruker BioSpin GmbH |
| 2 Solvent                | CDCl3               |
| 3 Temperature            | 295.3               |
| 4 Number of Scans        | 4                   |
| 5 Spectrometer Frequency | 400.13              |
| 6 Nucleus                | <sup>1</sup> H      |

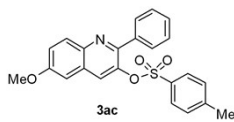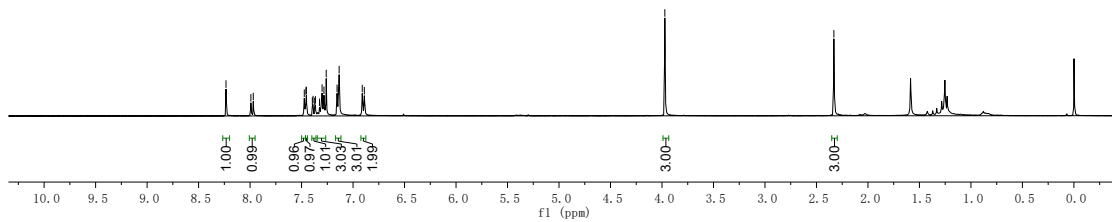

1.00

0.99

0.96

0.97

1.04

3.04

1.99

3.00

3.00

| Parameter                | Value               |
|--------------------------|---------------------|
| 1 Origin                 | Bruker BioSpin GmbH |
| 2 Solvent                | CDCl3               |
| 3 Temperature            | 294.7               |
| 4 Number of Scans        | 42                  |
| 5 Spectrometer Frequency | 100.62              |
| 6 Nucleus                | <sup>13</sup> C     |

154.059  
146.013  
145.030  
140.140  
139.528  
137.811  
132.486  
130.225  
129.715  
129.698  
129.492  
128.953  
128.433  
128.053  
127.439  
124.491

77.478  
77.160  
76.842

21.771  
13.962

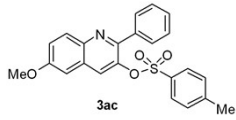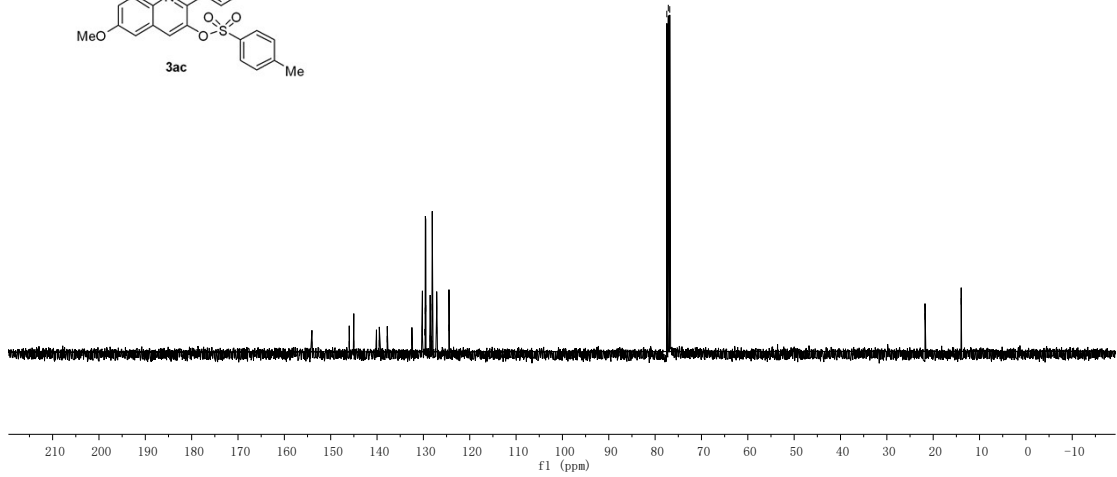

8.258  
8.113  
8.100  
8.088  
8.075  
7.521  
7.494  
7.491  
7.342  
7.327  
7.309  
7.292  
7.281  
7.183  
7.162  
6.939  
6.918

2.339

| Parameter                | Value               |
|--------------------------|---------------------|
| 1 Origin                 | Bruker BioSpin GmbH |
| 2 Solvent                | CDCl3               |
| 3 Temperature            | 295.1               |
| 4 Number of Scans        | 4                   |
| 5 Spectrometer Frequency | 400.13              |
| 6 Nucleus                | <sup>1</sup> H      |

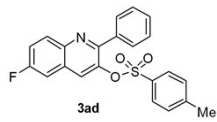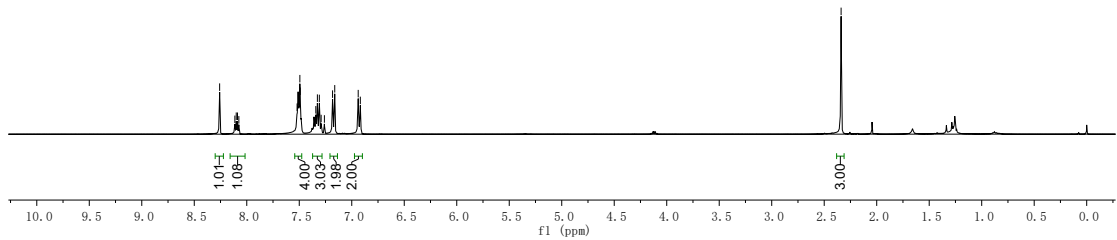

1.01

1.08

4.00

3.03

1.98

2.00

3.00

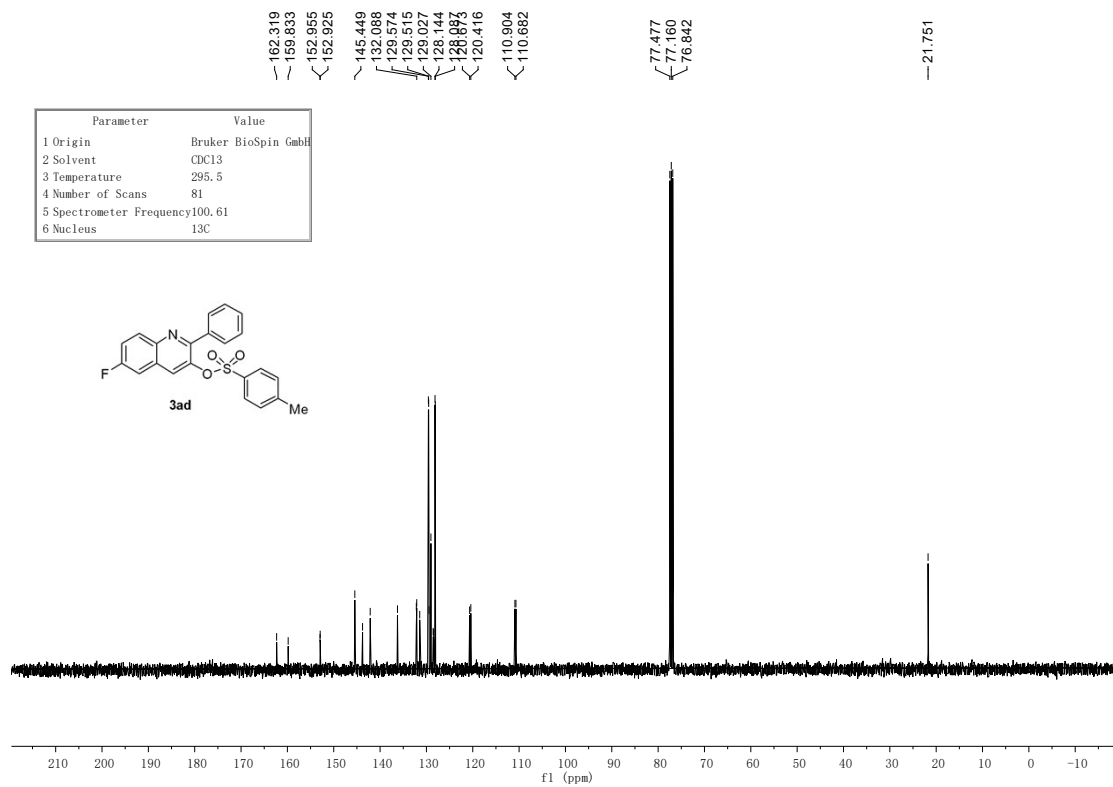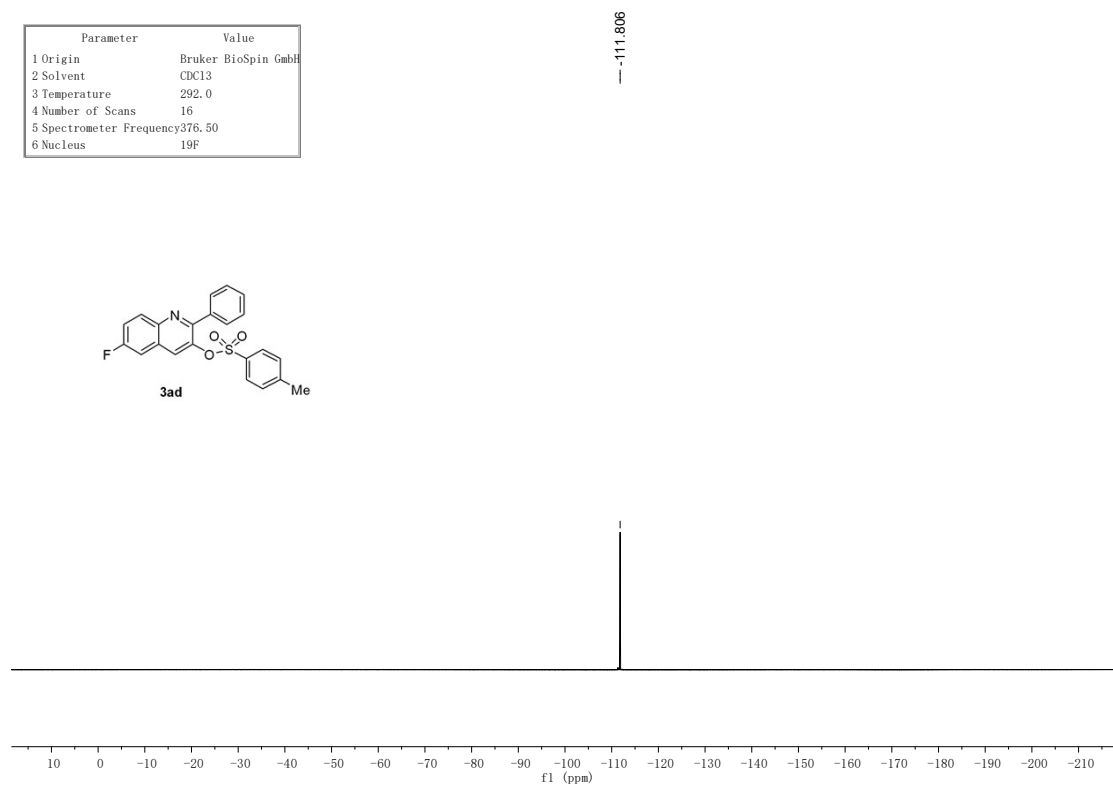

8.223  
8.043  
8.021  
7.874  
7.869  
7.681  
7.675  
7.658  
7.523  
7.505  
7.386  
7.368  
7.350  
7.332  
7.314  
7.297  
7.261  
7.181  
7.161  
6.941

| Parameter                | Value               |
|--------------------------|---------------------|
| 1 Origin                 | Bruker BioSpin GmbH |
| 2 Solvent                | CDCl3               |
| 3 Temperature            | 296.0               |
| 4 Number of Scans        | 4                   |
| 5 Spectrometer Frequency | 400.13              |
| 6 Nucleus                | 1H                  |

2.342

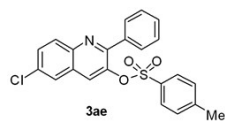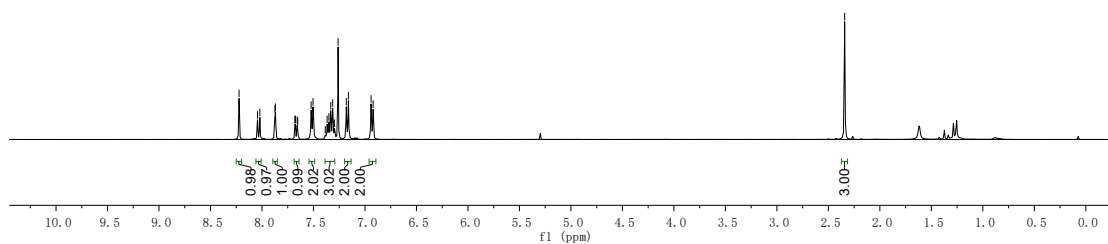

153.875  
145.494  
144.995  
142.118  
136.160  
133.414  
131.432  
131.193  
131.142  
129.599  
129.596  
129.178  
128.348  
128.161  
128.114  
126.316

77.477  
77.160  
76.842

21.767

| Parameter                | Value               |
|--------------------------|---------------------|
| 1 Origin                 | Bruker BioSpin GmbH |
| 2 Solvent                | CDCl3               |
| 3 Temperature            | 296.1               |
| 4 Number of Scans        | 105                 |
| 5 Spectrometer Frequency | 100.61              |
| 6 Nucleus                | 13C                 |

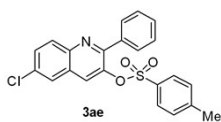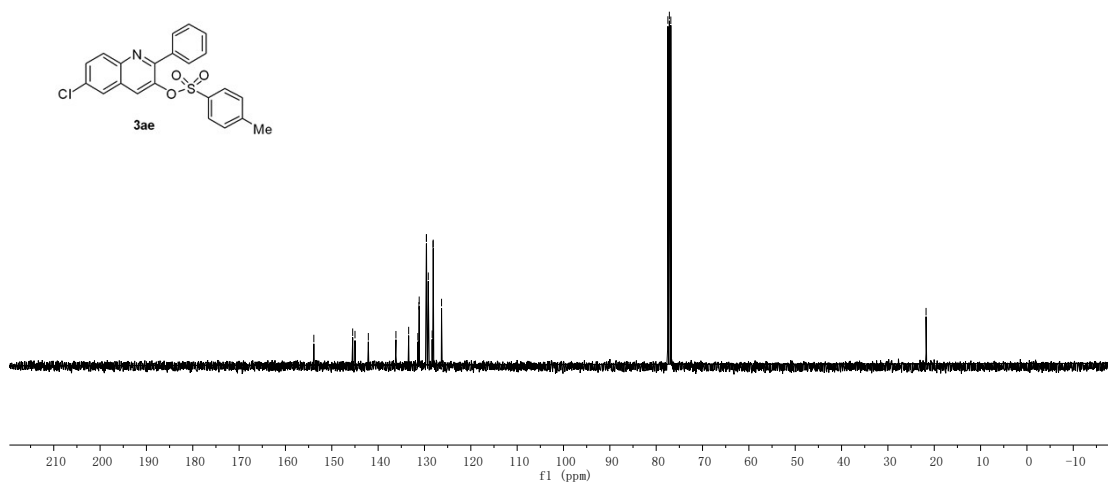

8.217  
8.054  
8.049  
7.972  
7.949  
7.810  
7.805  
7.788  
7.783  
7.523  
7.506  
7.503  
7.388  
7.370  
7.314  
7.297  
7.261  
7.178  
7.157  
6.939  
6.919

| Parameter                | Value               |
|--------------------------|---------------------|
| 1 Origin                 | Bruker BioSpin GmbH |
| 2 Solvent                | CDCl3               |
| 3 Temperature            | 295.0               |
| 4 Number of Scans        | 4                   |
| 5 Spectrometer Frequency | 400.13              |
| 6 Nucleus                | 1H                  |

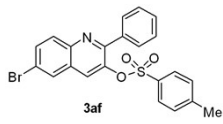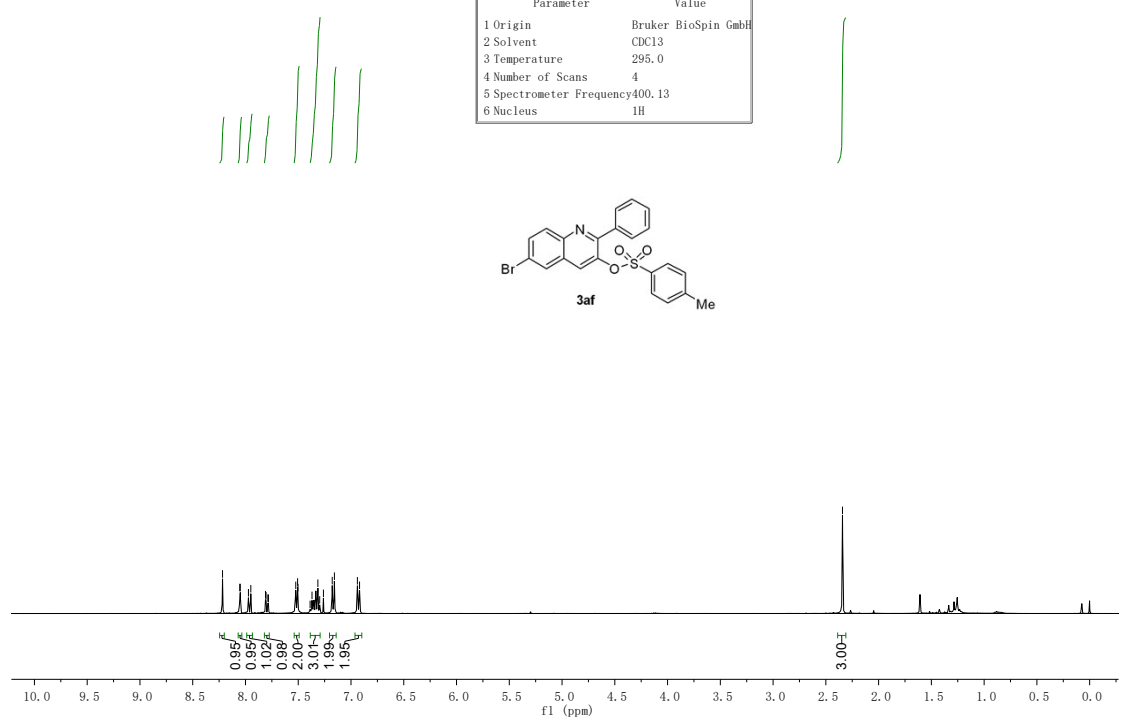

154.037  
145.496  
145.189  
142.034  
136.155  
133.726  
131.410  
131.227  
129.676  
128.898  
128.555  
128.202  
128.049  
128.677  
128.177  
126.177  
121.567

77.478  
77.160  
76.843

21.771

| Parameter                | Value               |
|--------------------------|---------------------|
| 1 Origin                 | Bruker BioSpin GmbH |
| 2 Solvent                | CDCl3               |
| 3 Temperature            | 295.3               |
| 4 Number of Scans        | 101                 |
| 5 Spectrometer Frequency | 100.61              |
| 6 Nucleus                | 13C                 |

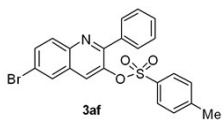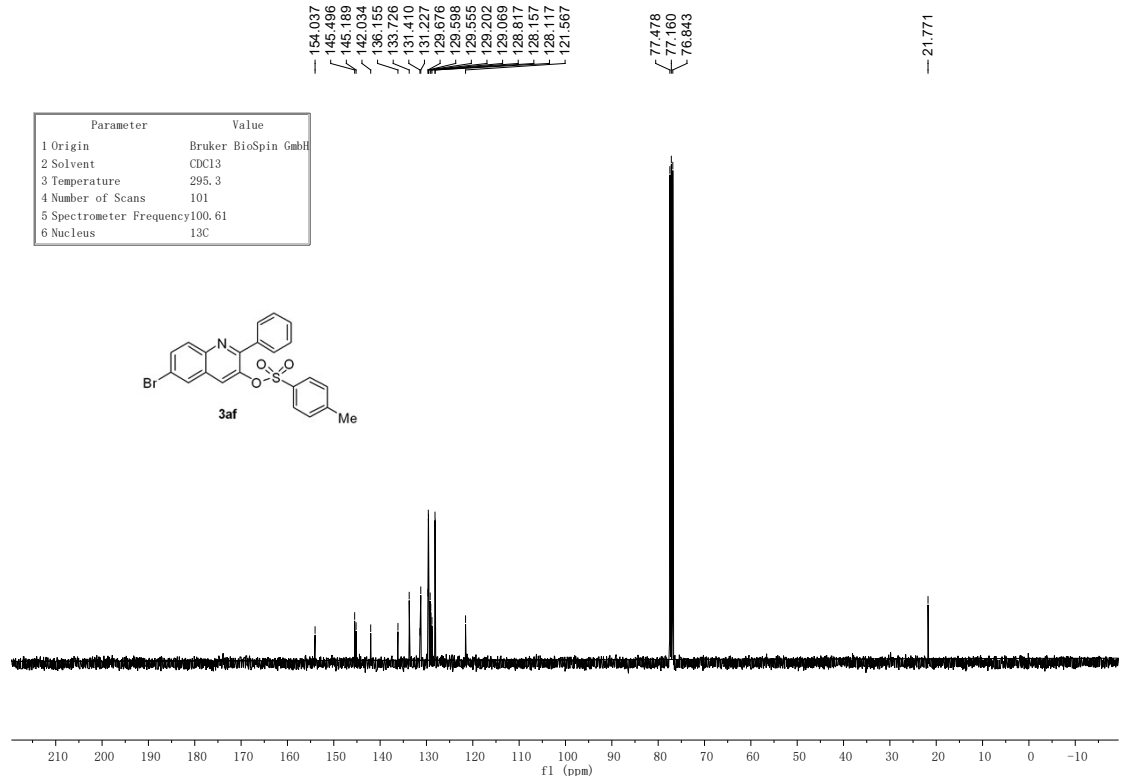

8.850  
8.844  
8.483  
8.477  
8.458  
8.235  
8.235  
8.235  
7.587  
7.583  
7.442  
7.442  
7.424  
7.406  
7.376  
7.357  
7.261  
7.223  
7.202  
6.877  
6.857

| Parameter                | Value               |
|--------------------------|---------------------|
| 1 Origin                 | Bruker BioSpin GmbH |
| 2 Solvent                | CDCl3               |
| 3 Temperature            | 295.0               |
| 4 Number of Scans        | 4                   |
| 5 Spectrometer Frequency | 400.13              |
| 6 Nucleus                | 1H                  |

2.360

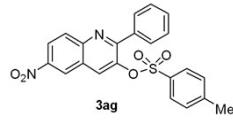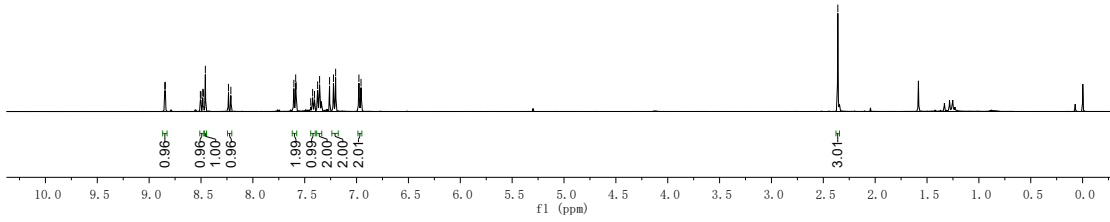

157.240  
148.389  
146.088  
145.523  
142.752  
135.670  
131.565  
131.379  
130.916  
129.748  
128.273  
128.184  
126.611  
124.677  
123.623

77.477  
77.160  
76.842

21.808

| Parameter                | Value               |
|--------------------------|---------------------|
| 1 Origin                 | Bruker BioSpin GmbH |
| 2 Solvent                | CDCl3               |
| 3 Temperature            | 295.2               |
| 4 Number of Scans        | 200                 |
| 5 Spectrometer Frequency | 100.61              |
| 6 Nucleus                | 13C                 |

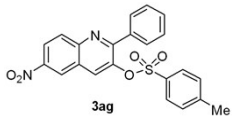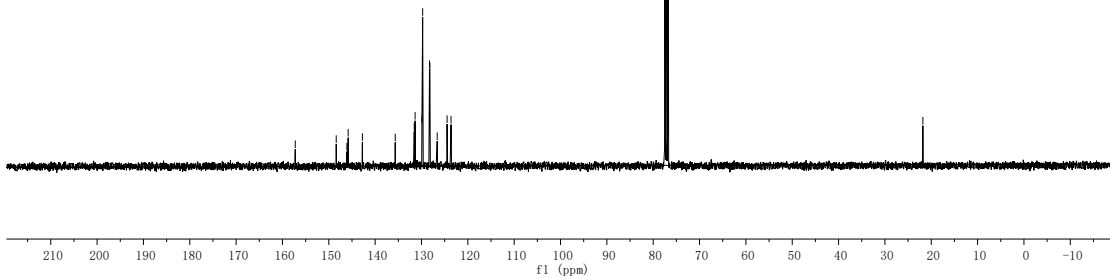

8.119  
8.098  
8.049  
8.028  
7.747  
7.744  
7.726  
7.709  
7.706  
7.630  
7.628  
7.610  
7.592  
7.590  
7.529  
7.512  
7.509  
7.260  
7.243  
7.207  
7.190  
6.960  
6.940

| Parameter                | Value               |
|--------------------------|---------------------|
| 1 Origin                 | Bruker BioSpin GmbH |
| 2 Solvent                | CDCl3               |
| 3 Temperature            | 296.0               |
| 4 Number of Scans        | 4                   |
| 5 Spectrometer Frequency | 400.13              |
| 6 Nucleus                | 1H                  |

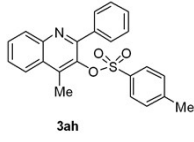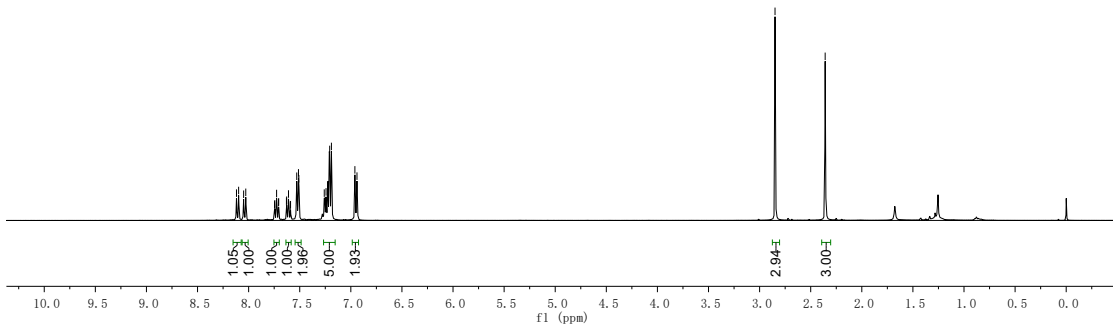

154.049  
146.003  
145.020  
140.130  
139.518  
137.801  
132.477  
130.216  
129.706  
129.588  
129.462  
128.544  
128.224  
128.084  
127.044  
127.130  
124.482

| Parameter                | Value               |
|--------------------------|---------------------|
| 1 Origin                 | Bruker BioSpin GmbH |
| 2 Solvent                | CDCl3               |
| 3 Temperature            | 294.7               |
| 4 Number of Scans        | 42                  |
| 5 Spectrometer Frequency | 100.61              |
| 6 Nucleus                | 13C                 |

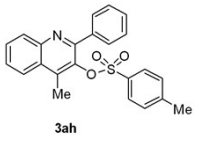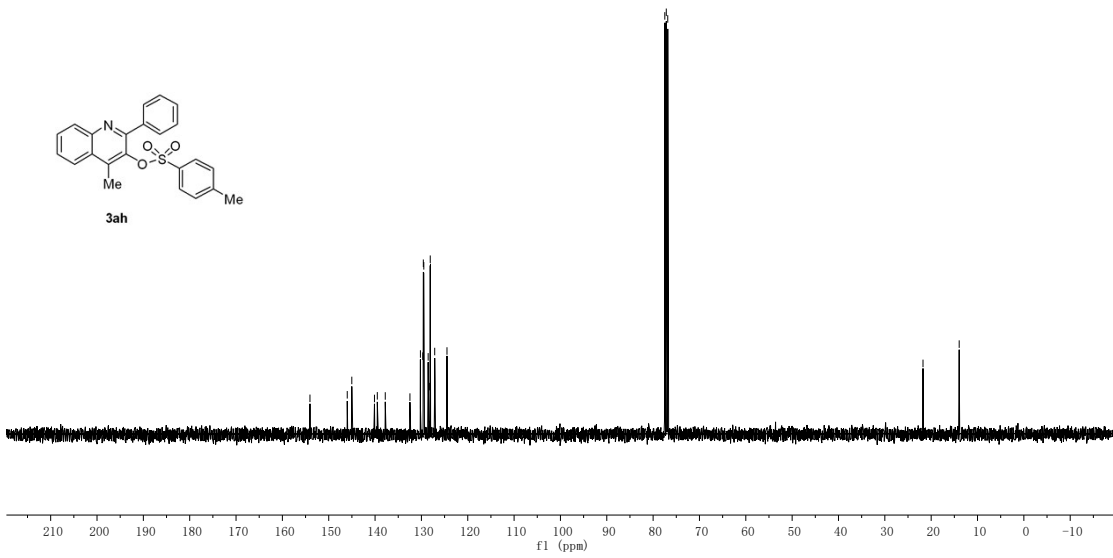

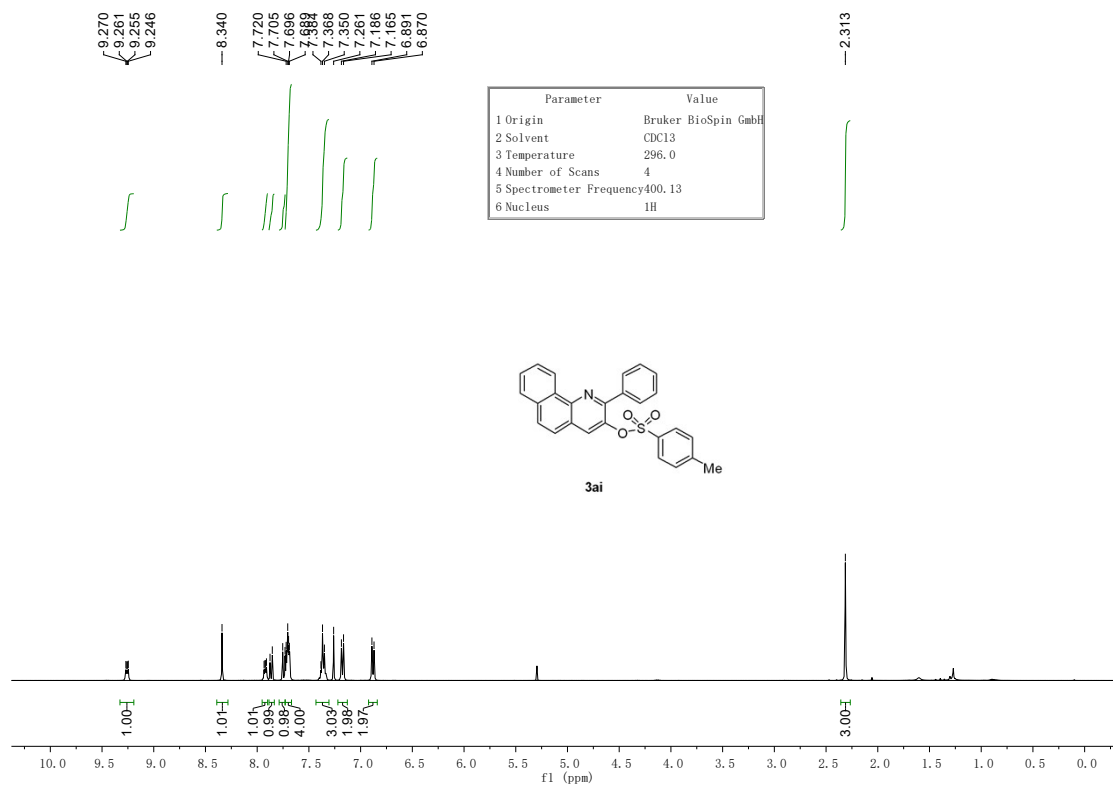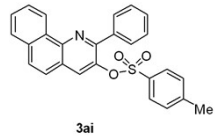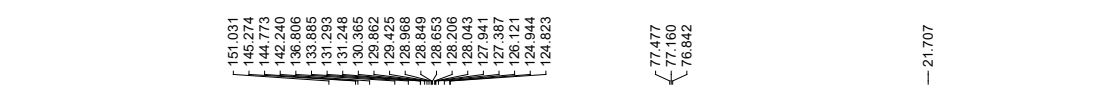

| Parameter                | Value               |
|--------------------------|---------------------|
| 1 Origin                 | Bruker BioSpin GmbH |
| 2 Solvent                | CDCl3               |
| 3 Temperature            | 296.5               |
| 4 Number of Scans        | 41                  |
| 5 Spectrometer Frequency | 100.61              |
| 6 Nucleus                | 13C                 |

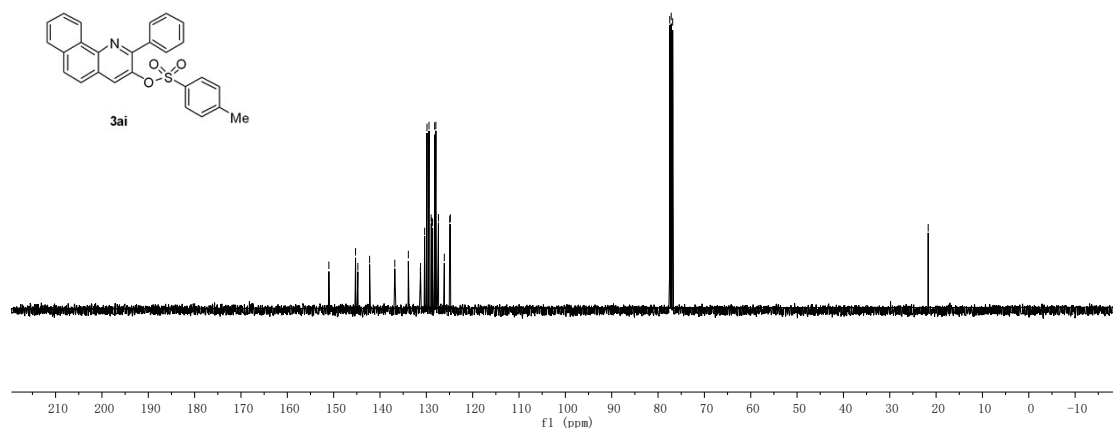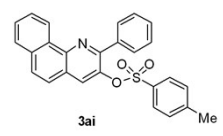



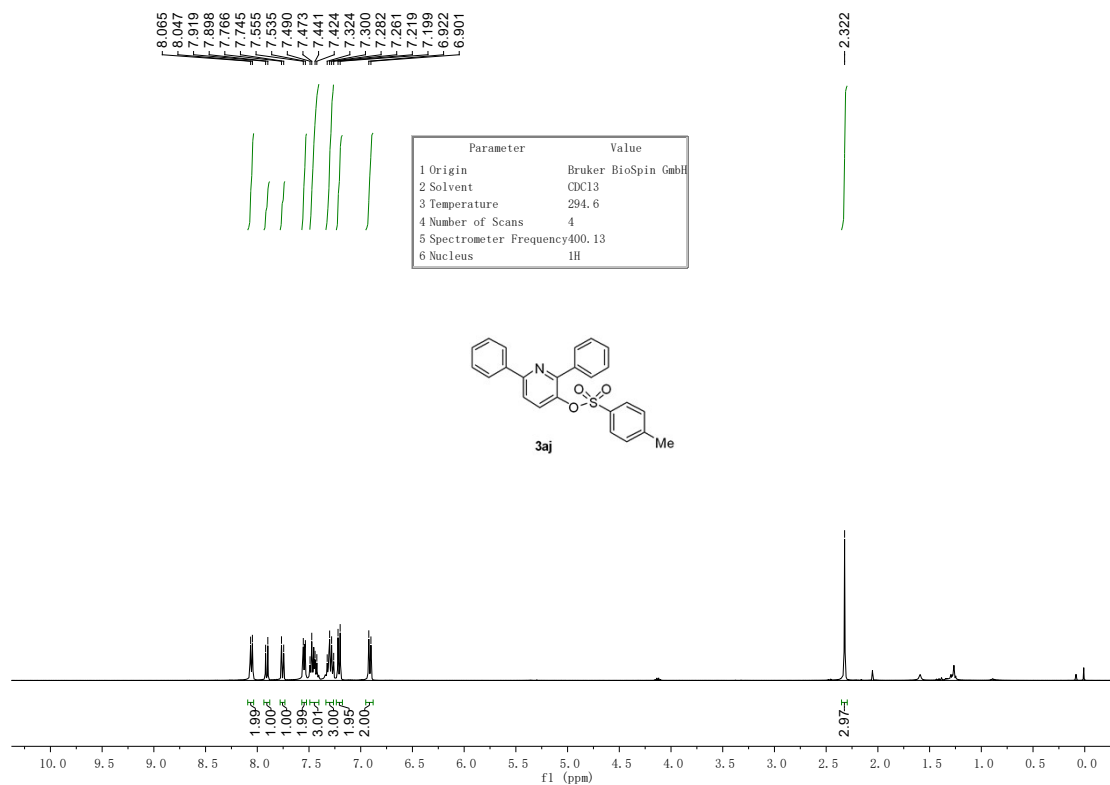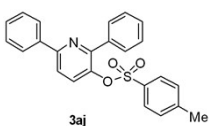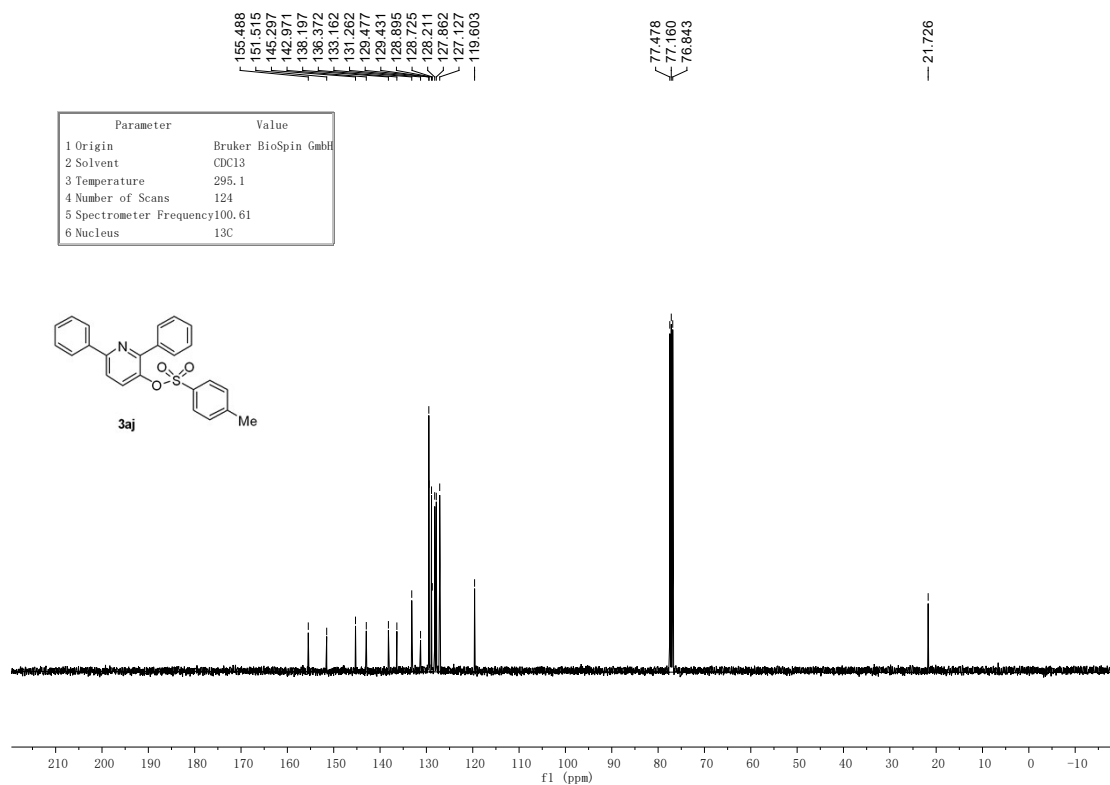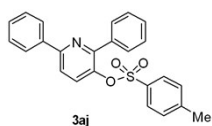

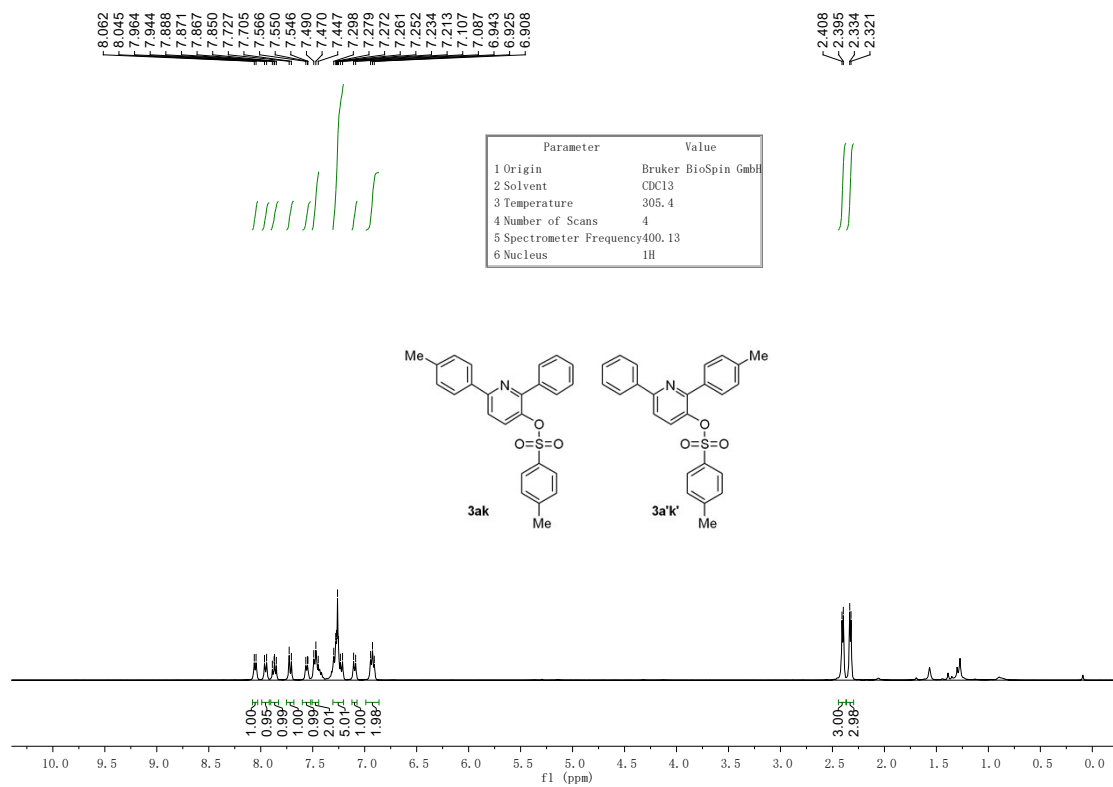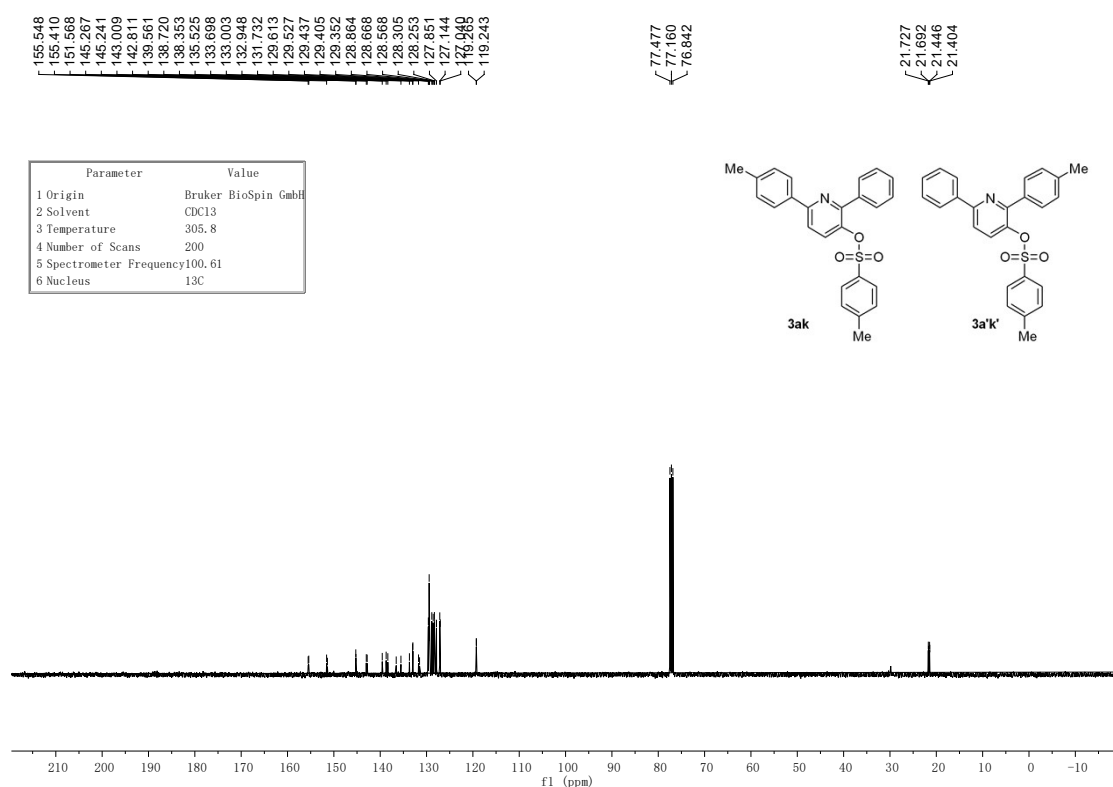

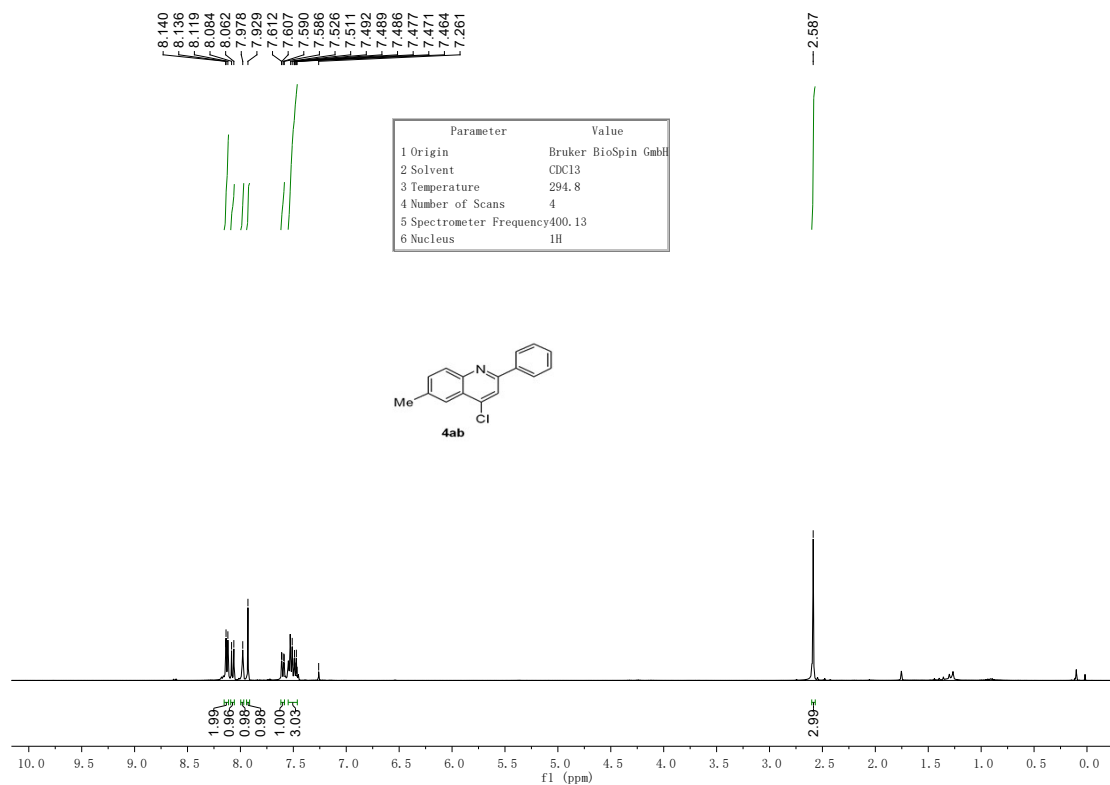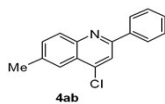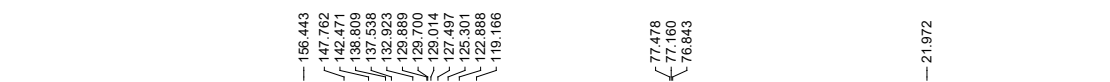

| Parameter                | Value               |
|--------------------------|---------------------|
| 1 Origin                 | Bruker BioSpin GmbH |
| 2 Solvent                | CDCl3               |
| 3 Temperature            | 295.2               |
| 4 Number of Scans        | 21                  |
| 5 Spectrometer Frequency | 100.61              |
| 6 Nucleus                | 13C                 |

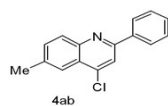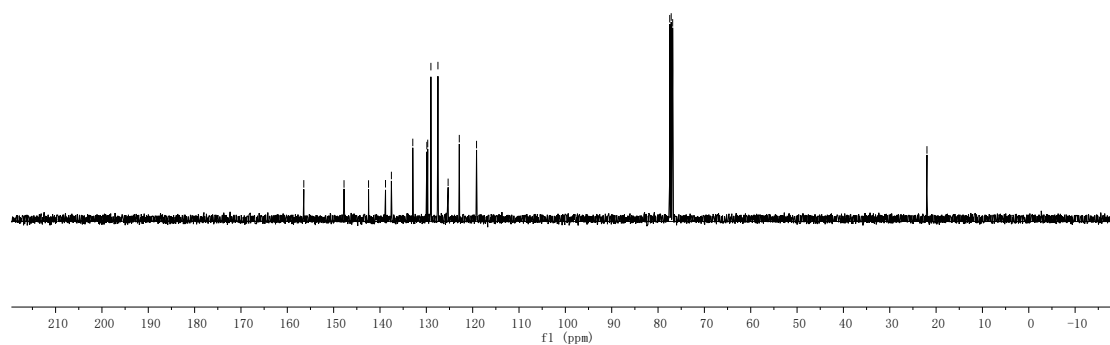

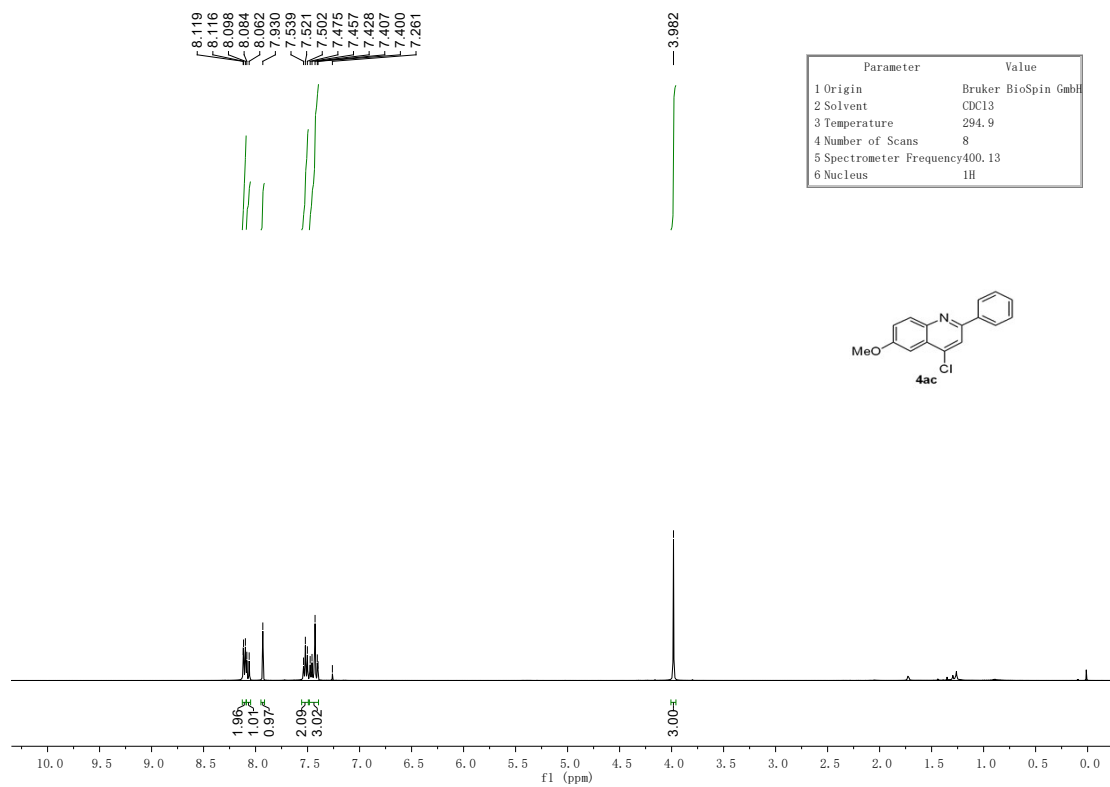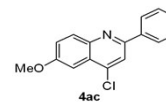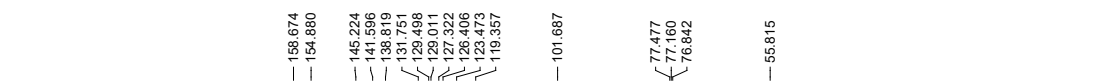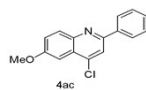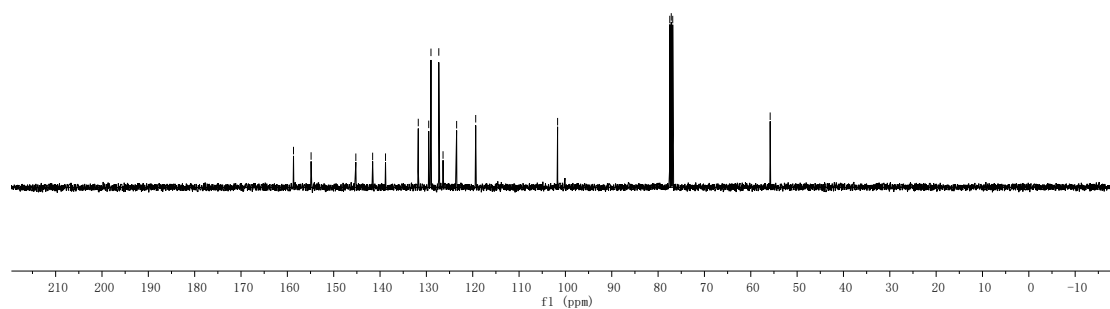

8.197  
8.163  
8.174  
8.160  
8.153  
8.149  
8.142  
7.890  
7.847  
7.831  
7.824  
7.566  
7.538  
7.520  
7.488  
7.473  
7.261

| Parameter                | Value               |
|--------------------------|---------------------|
| 1 Origin                 | Bruker BioSpin GmbH |
| 2 Solvent                | CDCl3               |
| 3 Temperature            | 295.1               |
| 4 Number of Scans        | 4                   |
| 5 Spectrometer Frequency | 400.13              |
| 6 Nucleus                | 1H                  |

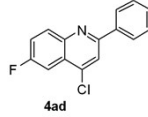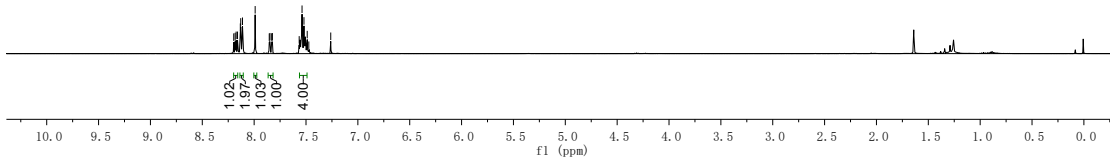

162.410  
159.831  
156.806  
156.777  
146.244  
142.438  
138.417  
132.874  
132.783  
130.008  
129.120  
127.513  
126.378  
121.082  
120.826  
118.894  
107.809

77.477  
77.160  
76.842

| Parameter                | Value               |
|--------------------------|---------------------|
| 1 Origin                 | Bruker BioSpin GmbH |
| 2 Solvent                | CDCl3               |
| 3 Temperature            | 295.1               |
| 4 Number of Scans        | 41                  |
| 5 Spectrometer Frequency | 100.61              |
| 6 Nucleus                | 13C                 |

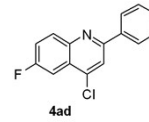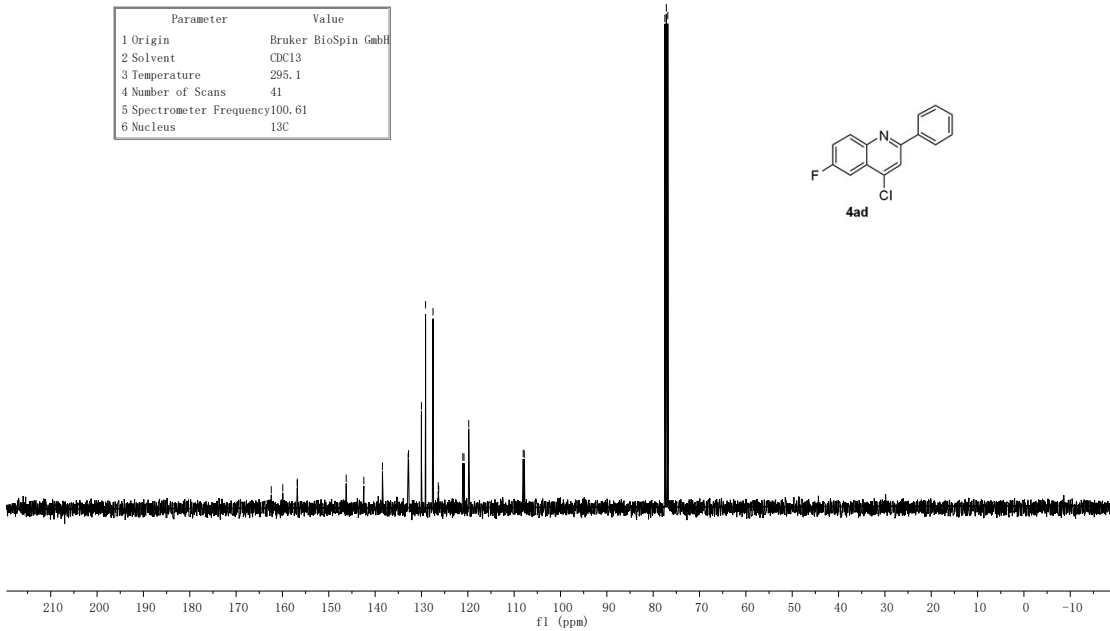

| Parameter                | Value               |
|--------------------------|---------------------|
| 1 Origin                 | Bruker BioSpin GmbH |
| 2 Solvent                | CDCl3               |
| 3 Temperature            | 292.0               |
| 4 Number of Scans        | 16                  |
| 5 Spectrometer Frequency | 376.50              |
| 6 Nucleus                | <sup>19</sup> F     |

-111.239

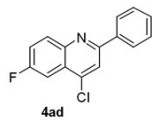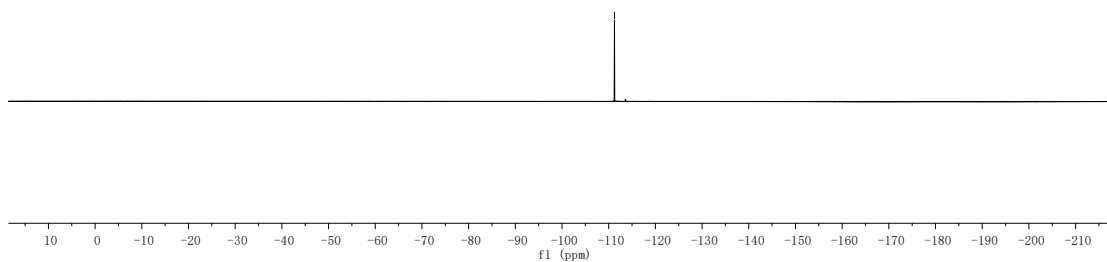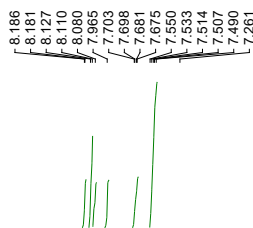

| Parameter                | Value               |
|--------------------------|---------------------|
| 1 Origin                 | Bruker BioSpin GmbH |
| 2 Solvent                | CDCl3               |
| 3 Temperature            | 296.0               |
| 4 Number of Scans        | 4                   |
| 5 Spectrometer Frequency | 400.13              |
| 6 Nucleus                | <sup>1</sup> H      |

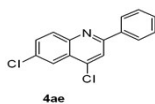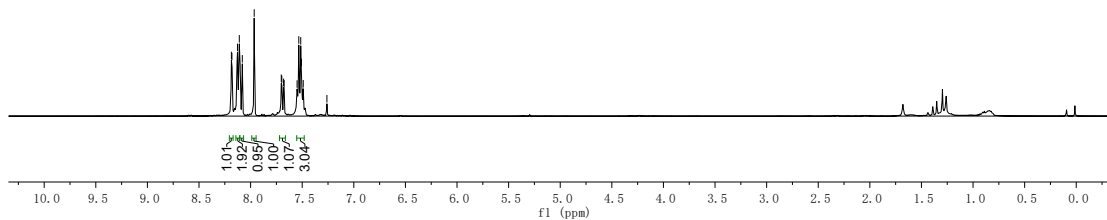

157.532  
 147.521  
 142.169  
 138.232  
 133.371  
 131.781  
 131.626  
 130.160  
 129.110  
 127.558  
 126.084  
 123.081  
 119.859  
 77.479  
 77.160  
 76.844

| Parameter                | Value               |
|--------------------------|---------------------|
| 1 Origin                 | Bruker BioSpin GmbH |
| 2 Solvent                | CDCl3               |
| 3 Temperature            | 296.2               |
| 4 Number of Scans        | 30                  |
| 5 Spectrometer Frequency | 100.61              |
| 6 Nucleus                | 13C                 |

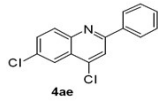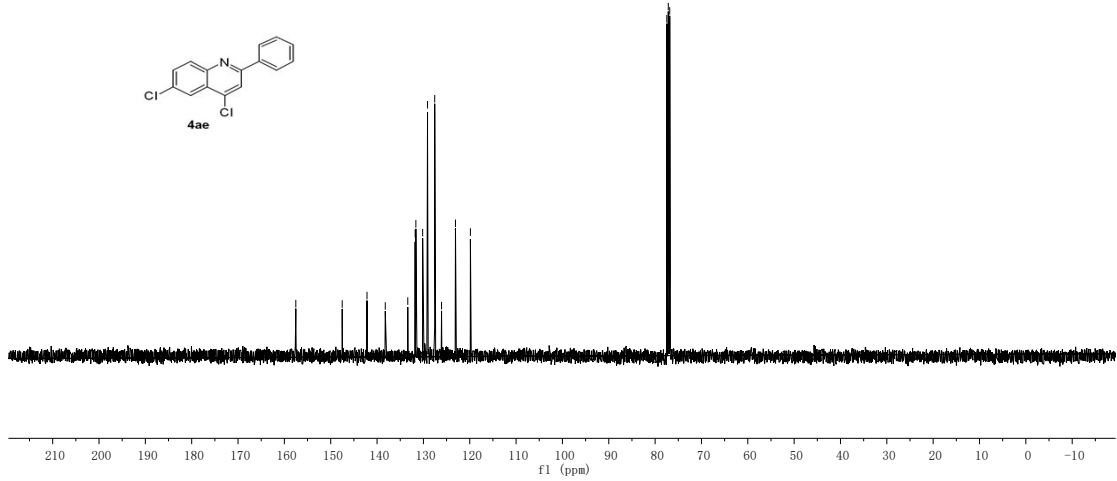

8.363  
 8.335  
 8.123  
 8.112  
 8.109  
 8.030  
 8.007  
 7.962  
 7.835  
 7.830  
 7.813  
 7.807  
 7.549  
 7.534  
 7.493  
 7.474  
 7.261

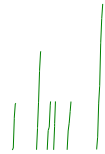

| Parameter                | Value               |
|--------------------------|---------------------|
| 1 Origin                 | Bruker BioSpin GmbH |
| 2 Solvent                | CDCl3               |
| 3 Temperature            | 295.0               |
| 4 Number of Scans        | 4                   |
| 5 Spectrometer Frequency | 400.13              |
| 6 Nucleus                | 1H                  |

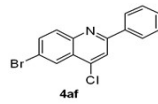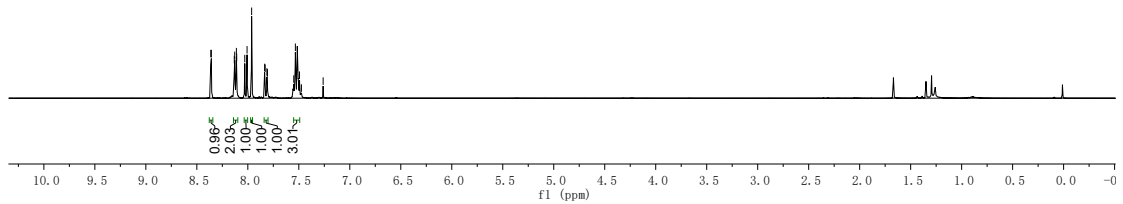

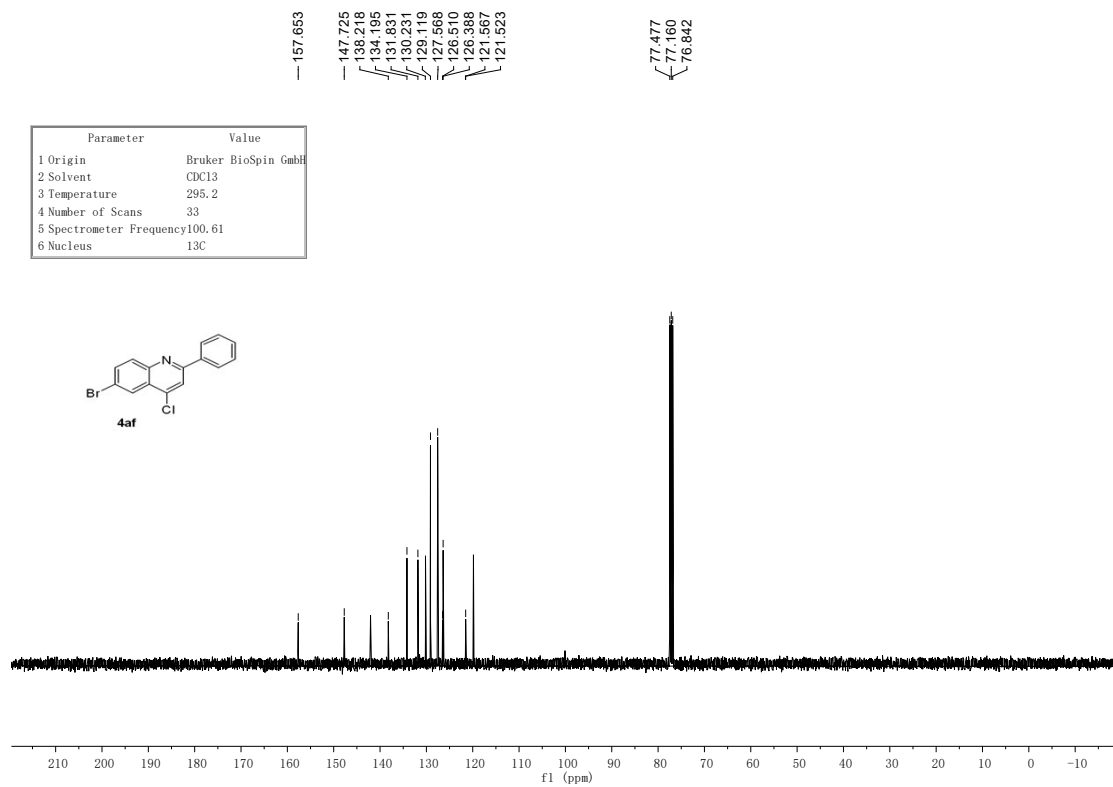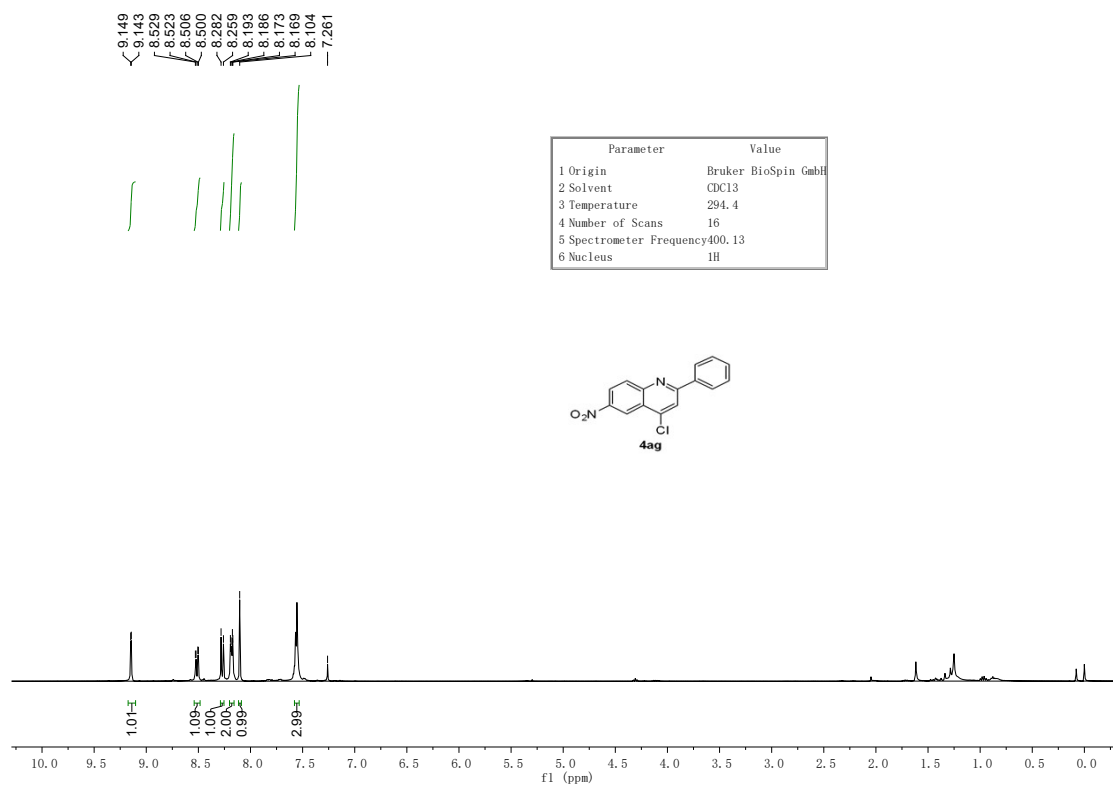



160.640  
 151.193  
 145.926  
 145.019  
 137.503  
 132.000  
 131.095  
 129.291  
 127.893  
 124.686  
 124.193  
 121.344  
 120.686  
 77.477  
 77.160  
 76.842

| Parameter                | Value               |
|--------------------------|---------------------|
| 1 Origin                 | Bruker BioSpin GmbH |
| 2 Solvent                | CDCl3               |
| 3 Temperature            | 295.0               |
| 4 Number of Scans        | 40                  |
| 5 Spectrometer Frequency | 100.61              |
| 6 Nucleus                | 13C                 |

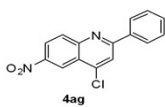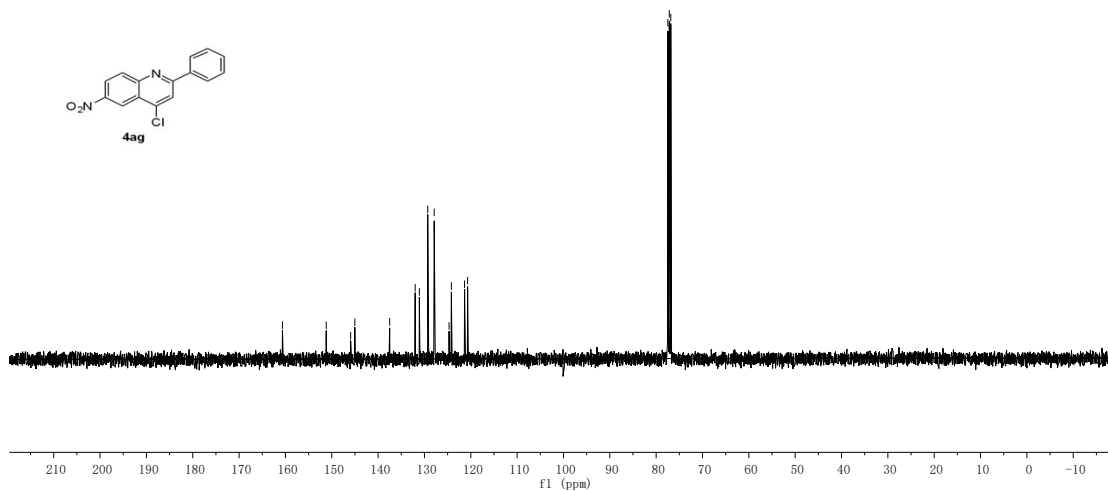

9.492  
 8.325  
 8.306  
 8.141  
 8.118  
 8.092  
 7.945  
 7.925  
 7.900  
 7.877  
 7.793  
 7.778  
 7.754  
 7.721  
 7.594  
 7.576  
 7.557  
 7.524  
 7.506  
 7.488  
 7.261

| Parameter                | Value               |
|--------------------------|---------------------|
| 1 Origin                 | Bruker BioSpin GmbH |
| 2 Solvent                | CDCl3               |
| 3 Temperature            | 296.5               |
| 4 Number of Scans        | 4                   |
| 5 Spectrometer Frequency | 400.13              |
| 6 Nucleus                | 1H                  |

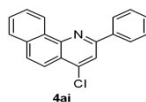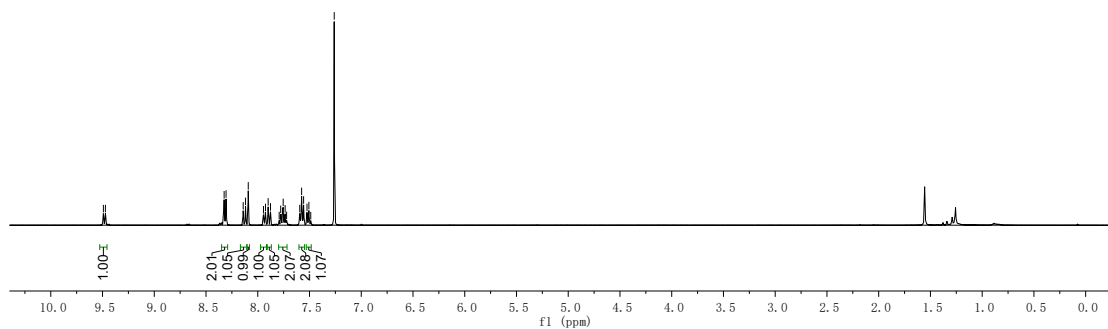

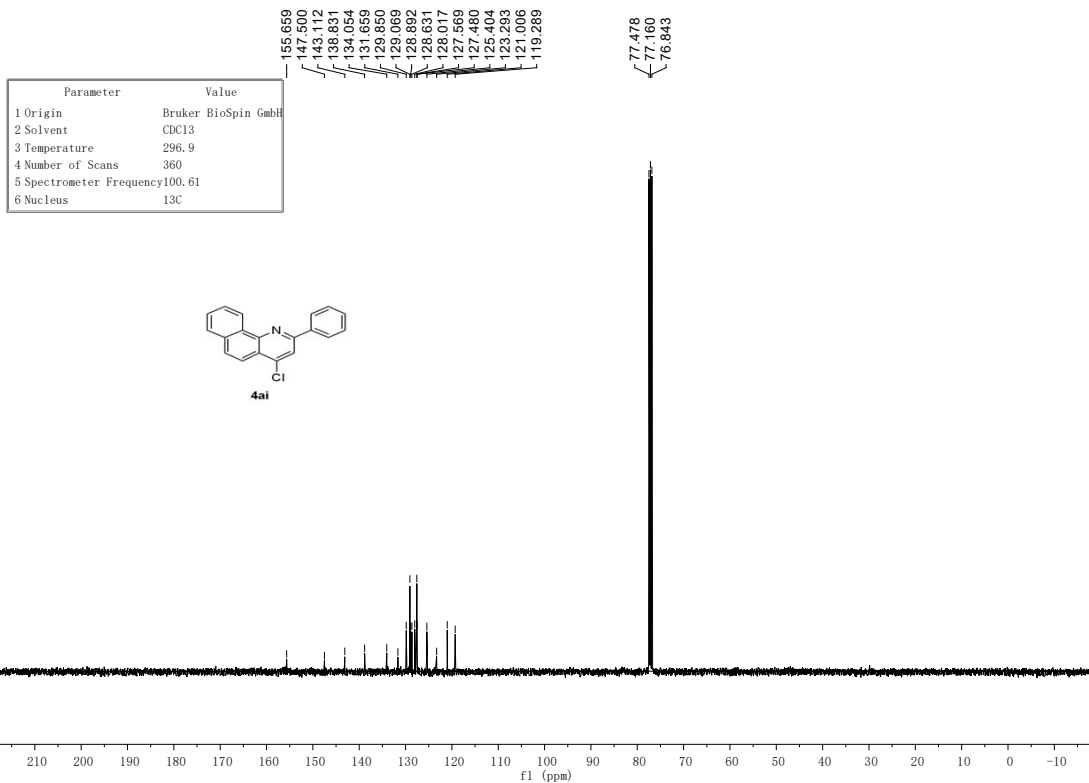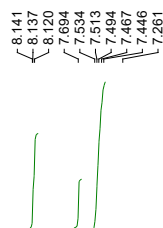

| Parameter                | Value               |
|--------------------------|---------------------|
| 1 Origin                 | Bruker BioSpin GmbH |
| 2 Solvent                | CDCl3               |
| 3 Temperature            | 295.2               |
| 4 Number of Scans        | 4                   |
| 5 Spectrometer Frequency | 400.13              |
| 6 Nucleus                | 1H                  |

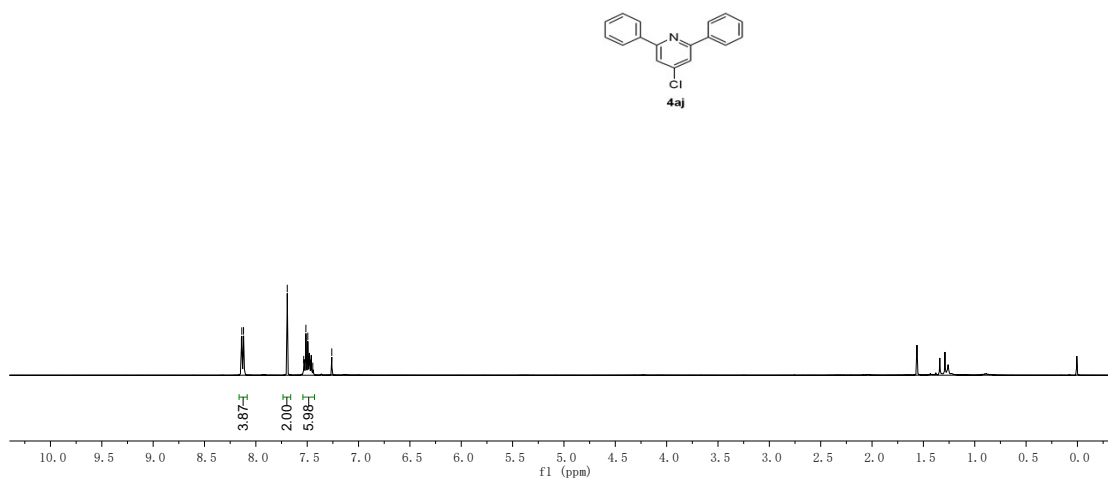

158.409  
 145.455  
 138.447  
 129.750  
 128.942  
 127.216  
 118.896  
 77.477  
 77.160  
 76.843

| Parameter                | Value               |
|--------------------------|---------------------|
| 1 Origin                 | Bruker BioSpin GmbH |
| 2 Solvent                | CDCl3               |
| 3 Temperature            | 295.3               |
| 4 Number of Scans        | 52                  |
| 5 Spectrometer Frequency | 100.61              |
| 6 Nucleus                | 13C                 |

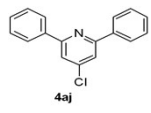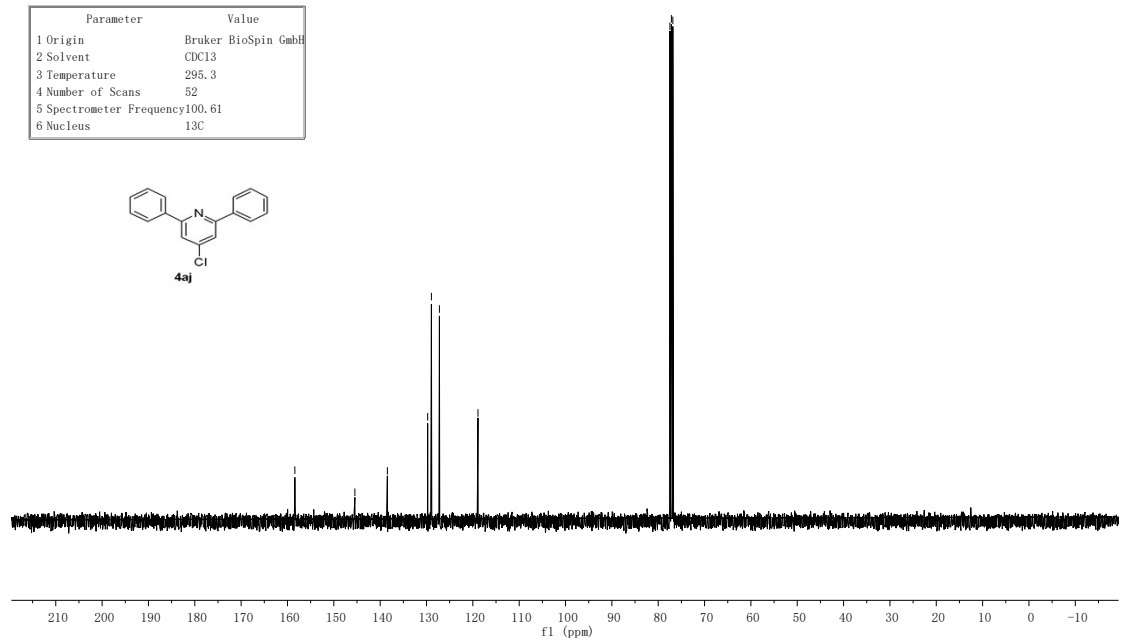

8.131  
 8.114  
 8.039  
 8.018  
 7.662  
 7.508  
 7.489  
 7.472  
 7.455  
 7.320  
 7.300  
 7.261

| Parameter                | Value               |
|--------------------------|---------------------|
| 1 Origin                 | Bruker BioSpin GmbH |
| 2 Solvent                | CDCl3               |
| 3 Temperature            | 301.0               |
| 4 Number of Scans        | 4                   |
| 5 Spectrometer Frequency | 400.13              |
| 6 Nucleus                | 1H                  |

2.433

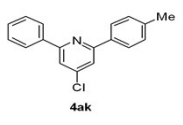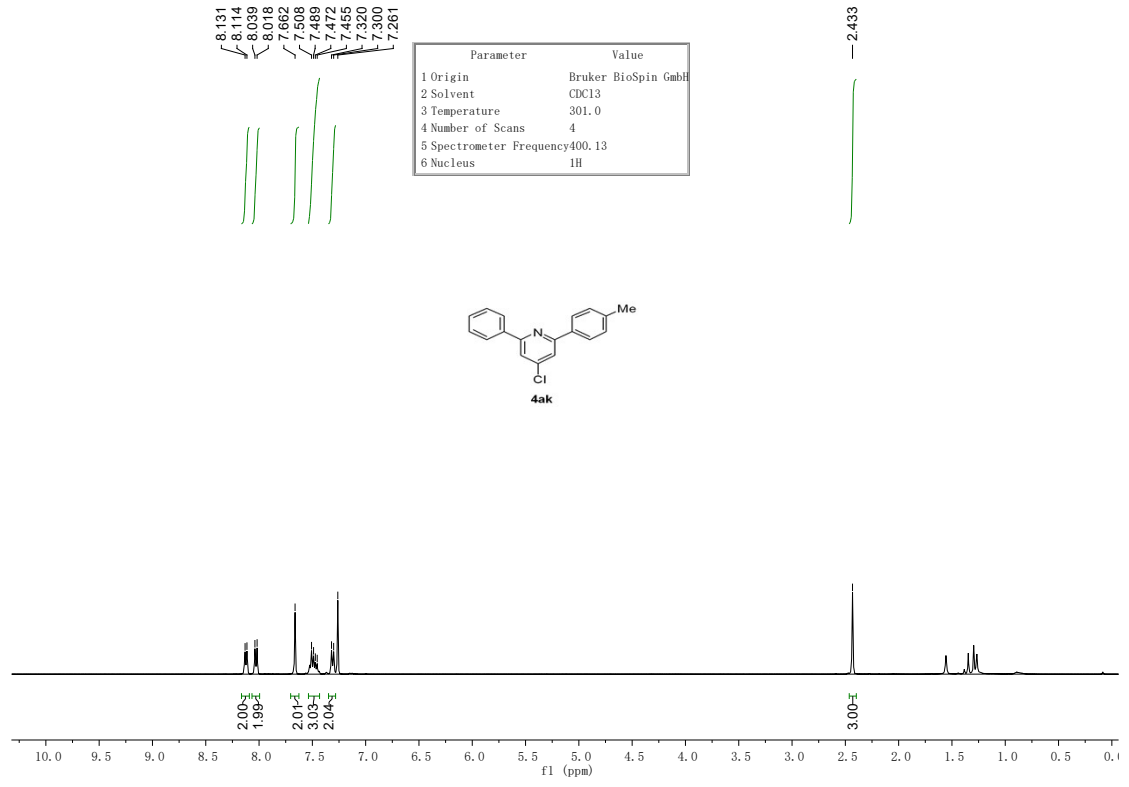

158.443  
 158.335  
 145.967  
 139.866  
 138.579  
 135.706  
 130.662  
 128.912  
 127.221  
 127.102  
 118.680  
 118.524  
 77.477  
 77.160  
 76.842

21.477

| Parameter                | Value               |
|--------------------------|---------------------|
| 1 Origin                 | Bruker BioSpin GmbH |
| 2 Solvent                | CDCl3               |
| 3 Temperature            | 301.3               |
| 4 Number of Scans        | 60                  |
| 5 Spectrometer Frequency | 100.61              |
| 6 Nucleus                | 13C                 |

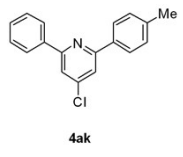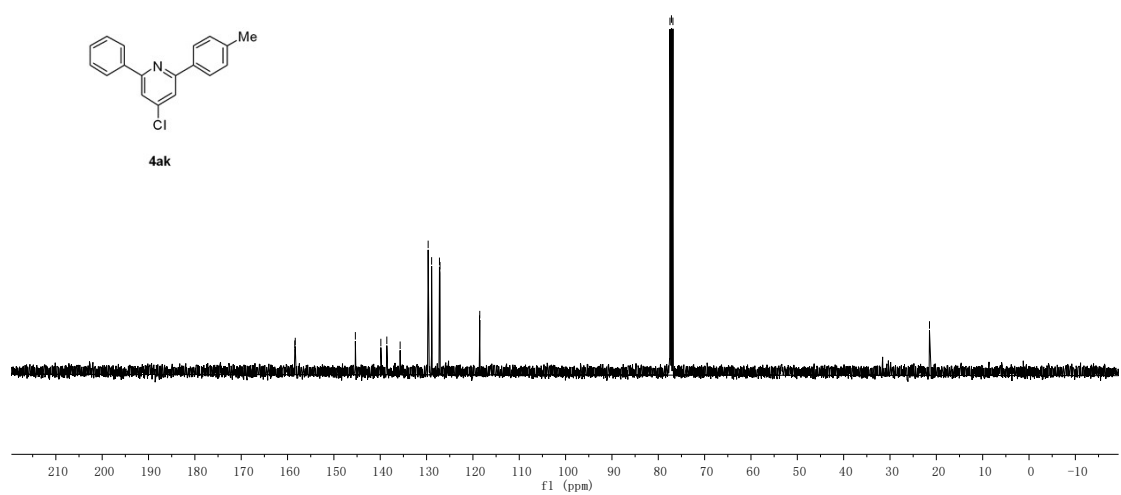

8.009  
 8.005  
 7.988  
 7.724  
 7.705  
 7.686  
 7.660  
 7.641  
 7.498  
 7.476  
 7.457  
 7.449  
 7.432  
 7.272  
 7.261  
 7.253

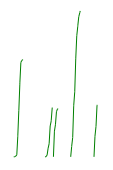

| Parameter                | Value               |
|--------------------------|---------------------|
| 1 Origin                 | Bruker BioSpin GmbH |
| 2 Solvent                | CDCl3               |
| 3 Temperature            | 294.5               |
| 4 Number of Scans        | 4                   |
| 5 Spectrometer Frequency | 400.13              |
| 6 Nucleus                | 1H                  |

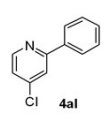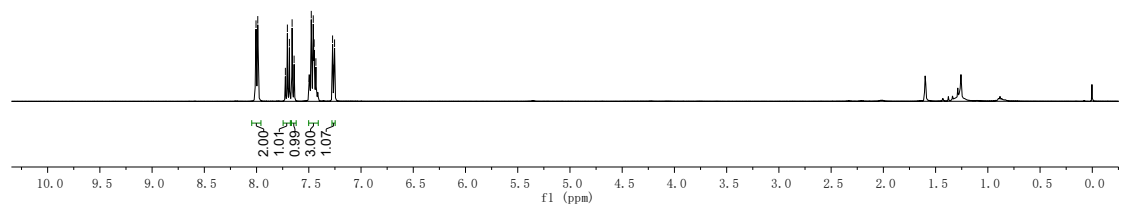

158.242  
151.495  
139.428  
137.845  
129.735  
128.944  
127.122  
122.857  
118.805  
77.477  
77.160  
76.842

| Parameter                | Value               |
|--------------------------|---------------------|
| 1 Origin                 | Bruker BioSpin GmbH |
| 2 Solvent                | CDCl3               |
| 3 Temperature            | 294.9               |
| 4 Number of Scans        | 32                  |
| 5 Spectrometer Frequency | 100.61              |
| 6 Nucleus                | 13C                 |

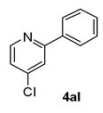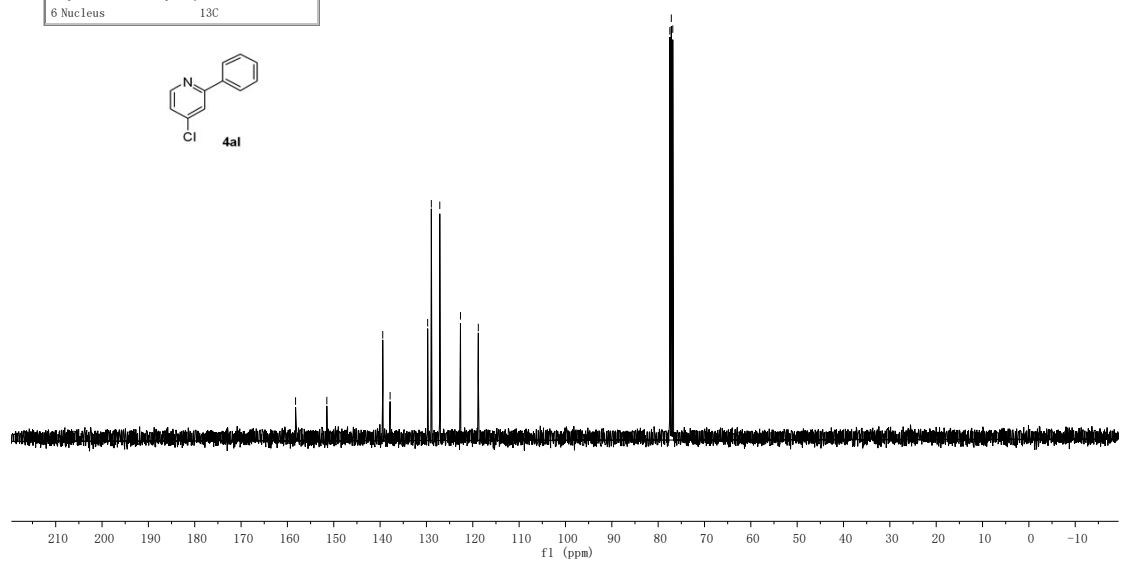

Supplement: d2qo01621d1.pdf [file d2qo01621d1.pdf]
